# Supplementary material for: Organocatalytic synthesis of enantiopure spiro acenaphthyl-pyrrolizidine/pyrrolidines: justifying the regioselectivity based on a distortion/interaction model
Source: Royal Society of Chemistry journal article supplement (doi:10.1039/c9ob01197h), 2019-01-01
Supplement: c9ob01197h1.pdf [file c9ob01197h1.pdf]

## Supplementary Material

### Organocatalytic Synthesis of Enantiopure Spiro Acenaphthyl-pyrrolizidine/pyrrolidines: Justifying the Regioselectivity based on Distortion/interaction Model

Naeimeh Shahrestani, <sup>[a]</sup> Hormoz Khosravi, <sup>[a]</sup> Khosrow Jadidi, <sup>\*[a]</sup> Behrouz Notash, <sup>[a]</sup> Soheila Naderi <sup>[a]</sup>

[a] Faculty of Chemistry and Petroleum Sciences, Shahid Beheshti University, G.C., Tehran 1983963113, Iran. Tel./fax: +98 021 22431661.  
E-mail:k-jadidi@sbu.ac.ir

#### Table of Contents

|                                                           |     |
|-----------------------------------------------------------|-----|
| General Information.....                                  | S1  |
| Computational details .....                               | S1  |
| Tables, scheme and figures .....                          | S2  |
| <sup>1</sup> H, <sup>13</sup> C NMR and HRMS spectra..... | S5  |
| Z-Matrix data .....                                       | S36 |

#### General Information

Optical rotations were measured with a Perkin–Elmer 341 polarimeter at 589 nm. <sup>1</sup>H and <sup>13</sup>C NMR spectra were recorded BRUKER DRX-300 AVANCE spectrometer (at 300.13 MHz for Protons and 75.47 MHz for Carbon-13) and BRUKER DRX-400 AVANCE spectrometer (at 400.4 MHz for protons and 100.7 MHz for Carbon-13). IR spectra were recorded on a Bomen FT-IR-MB-series instrument. Enantiomeric excess (ee) of compound 7b and 9 were determined by HPLC analysis using a Daicel Chiralpak AD-H column. All reagents and starting materials were purchased from Aldrich, Merck, and Fluka. All solvents were reagent grade and were dried and distilled immediately before use as follows: methanol and ethanol from mg/I<sub>2</sub>, methylene chloride from calcium hydride. Column chromatography was performed using silica gel 60 (230–400 mesh) eluting with ethyl acetate/n-hexane. TLC was performed using silica gel 60 F256 plates with visualization by UV.

#### Computational details

In this work, all geometries of the reactant (Re), transition states (TS) and products (Pr) have been fully optimized using B3LYP/6-31G(d,p) in gas phase at 298.15 K. Geometries of transition states have been verified to be correct structures by observation of a single imaginary frequency and intrinsic reaction coordinate (IRC) calculations. The electronic structures and Frontier orbital contributions are calculated by the natural bond orbital (NBO) method. Non-covalent interactions (NCI) have been plotted with using Multiwfn (version 3.3.8). All of the other calculations were carried out using the Gaussian 09 program. The optimized structures were shown using the CYLView software. Electronic chemical potential  $\mu$ , chemical hardness  $\eta$ , global nucleophilicity  $N$ , global electrophilicity  $\omega$ , softness  $S$ , Synchronicity  $S_y$  and Local Fukui functions were calculated based on the following formulas:

$$1) \quad \mu = (\epsilon_{\text{HOMO}} + \epsilon_{\text{LUMO}})/2$$

$$2) \quad \eta = \epsilon_{\text{LUMO}} - \epsilon_{\text{HOMO}}$$

$$3) \quad N = \epsilon_{\text{HOMO}} - \epsilon_{\text{HOMO(TCE)}}$$

$$4) \quad \omega = (\mu^2/2\eta)$$

$$5) \quad S = 1/(2\eta)$$

$$6) \quad S_y = 1 - (2n - 2)^{-1} \sum_{i=1}^n \frac{|\delta B_i - \delta B_{av}|}{\delta B_{av}}, \quad \delta B_i = \frac{B_i^{TS} - B_i^R}{B_i^P - B_i^R}, \quad \delta B_{av} = n^{-1} \sum_{i=1}^n \delta B_i$$

Here,  $n$  and  $\delta B_k$  correspond to the number of bonds directly involved in the reaction and the relative variation of the Wiberg bond indices.

$$7) \quad f_k^+ = q_k^N - q_k^{N+1}$$

$$8) \quad f_k^- = q_k^{N-1} - q_k^N$$

Where  $k$ ,  $N$  and  $q$ , correspond to the index of the atom, the number of electrons and the net charge, respectively.

## Tables, scheme and figures

**S1.** The analysis of global properties.

|                | $E_{\text{Homo}}$ | $E_{\text{Lumo}}$ | $\mu$ | $\eta$ | $\omega$ | $s$  | $N$  |
|----------------|-------------------|-------------------|-------|--------|----------|------|------|
| Dipolaro-Phile | -6.75             | -1.37             | -4.06 | 5.39   | 1.53     | 0.09 | 2.37 |
| Dipolar        | -4.55             | -1.38             | -2.96 | 3.16   | 1.39     | 0.16 | 4.58 |

All data were reported in eV.

**Table S2.** Local properties analysis.

|    | f+    | f-    | $\omega_k$ | s+       | s-       |
|----|-------|-------|------------|----------|----------|
| C1 | 0.020 | 0.026 | 0.030584   | 0.001857 | 0.002414 |
| C2 | 0.070 | 0.032 | 0.107046   | 0.006499 | 0.002971 |
| C3 | 0.012 | 0.114 | 0.016669   | 0.001897 | 0.018021 |
| C5 | 0.069 | 0.091 | 0.095849   | 0.010907 | 0.014385 |

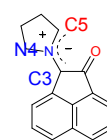

Dipolar 1

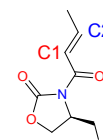

Dipolarophile 2

All data were reported in eV.

**Table S3.** Wiberg bond indices for reactants, transition structures and products

| Structure's Name | B(1,2) | B(2,3) | B(3,4) | B(4,5) | B(1,5) | B(1,3) | B(2,5) |
|------------------|--------|--------|--------|--------|--------|--------|--------|
| Dipolarophile 2  | 1.8284 |        |        |        |        |        |        |
| Dipolar 1        |        |        | 1.1267 | 1.4299 |        |        |        |
| TS-endo-regioA-2 | 1.4489 |        | 1.2191 | 1.2109 |        | 0.1121 | 0.4113 |
| TS-exo-regioA-1  | 1.424  |        | 1.0041 | 0.9929 |        | 0.1352 | 0.4458 |
| TS-exo-regioB-2  | 1.3698 | 0.3784 | 1.0933 | 1.2747 | 0.3391 |        |        |
| TS-endo-regioB-1 | 1.3547 | 0.4648 | 1.0477 | 1.3755 | 0.2096 |        |        |
| TS-endo-regioB-2 | 1.3523 | 0.4718 | 1.0487 | 1.3768 | 0.2058 |        |        |
| TS-exo-regioB-1  | 1.378  | 0.3797 | 1.0879 | 1.2819 | 0.3279 |        |        |
| TS-endo-regioA-1 | 1.4546 |        | 1.2067 | 1.2155 |        | 0.1236 | 0.4106 |
| TS-exo-regioA-2  | 1.4277 |        | 1.1976 | 1.1879 |        | 0.1306 | 0.4419 |
| Pr-endo-regioA-2 | 0.959  |        | 0.9779 | 0.948  |        | 0.9067 | 0.9736 |
| Pr-exo-regioA-1  | 0.9582 |        | 0.972  | 0.9112 |        | 0.9183 | 0.9857 |
| Pr-exo-regioB-2  | 0.9587 | 0.9288 | 0.9407 | 0.9418 | 0.946  |        |        |
| Pr-endo-regioB-1 | 0.9687 | 0.9357 | 0.9687 | 0.9484 | 0.9573 |        |        |
| Pr-endo-regioB-2 | 0.9599 | 0.9502 | 0.9414 | 0.9859 | 0.9187 |        |        |
| Pr-exo-regioB-1  | 0.9595 | 0.9207 | 0.9794 | 0.918  | 0.9793 |        |        |
| Pr-endo-regioA-1 | 0.9654 |        | 0.9681 | 0.9382 |        | 0.9256 | 0.9762 |
| Pr-exo-regioA-2  | 0.9655 |        | 0.9444 | 0.9683 |        | 0.9465 | 0.9615 |

**Table S4.** Synchronicity of bond formation in 1,3-DC reaction

| Structure's Name | Syn.     |
|------------------|----------|
| endo-regioA-2    | -0.26177 |
| exo-regioA-1     | 0.742837 |
| exo-regioB-2     | 0.847305 |
| endo-regioB-1    | 0.720736 |
| endo-regioB-2    | 0.737395 |
| exo-regioB-1     | 0.86008  |
| endo-regioA-1    | -0.00451 |
| exo-regioA-2     | 0.238014 |

**Table S5.** Thermodynamic and Kinetic data (All data were reported in kcal mol<sup>-1</sup>).

| Structure's Name | E <sub>a</sub> | ΔH    | ΔG   |
|------------------|----------------|-------|------|
| endo-regioA-1    | 5.3            | -21.1 | -5.9 |
| endo-regioA-2    | 6.0            | -20.1 | -4.2 |
| endo-regioB-1    | 9.8            | -20.4 | -5.7 |
| endo-regioB-2    | 9.4            | -22.0 | -6.4 |
| exo-regioA-1     | 11.6           | -17.0 | -2.1 |
| exo-regioA-2     | 11.4           | -19.1 | -4.2 |
| exo-regioB-1     | 12.8           | -20.9 | -6.6 |
| exo-regioB-2     | 13.1           | -20.9 | -6.2 |

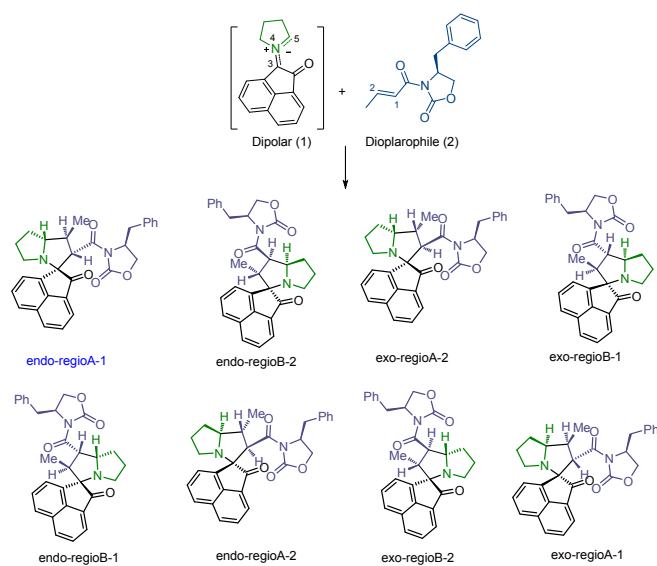

**Scheme S1.** The possible Products of the 1,3-DC reaction.

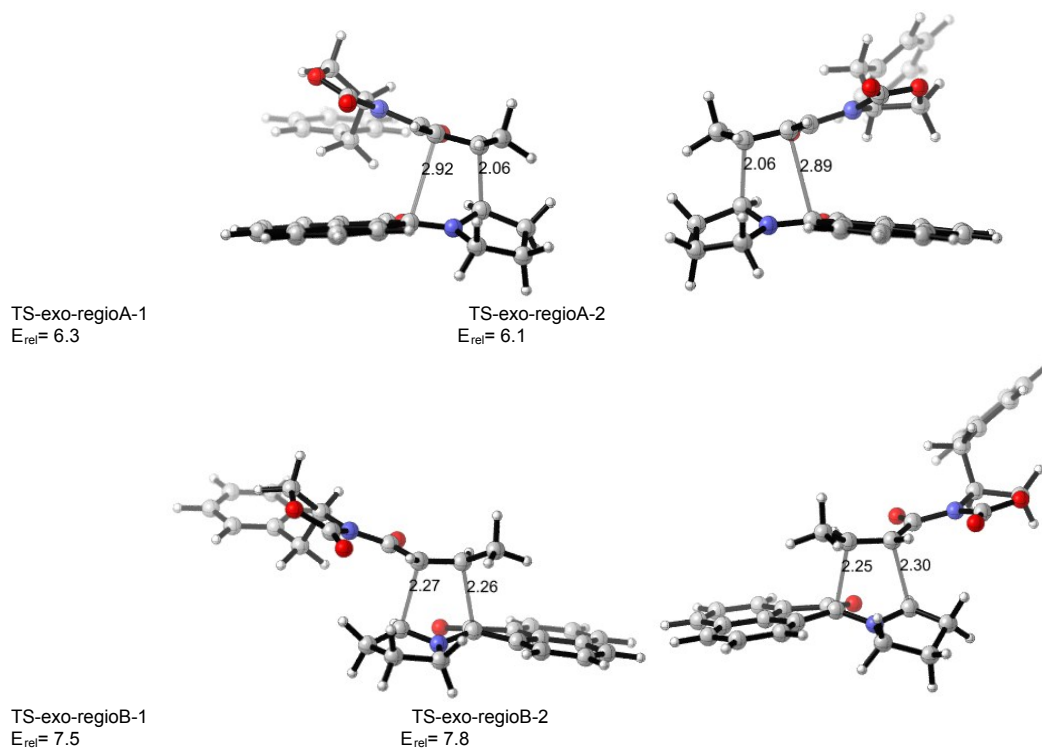

**Figure S1.** The transition state structures of endo products and relative electronic energies of these structures (in kcal mol<sup>-1</sup>, Calculated with B3LYP/6-31G(d,p)).

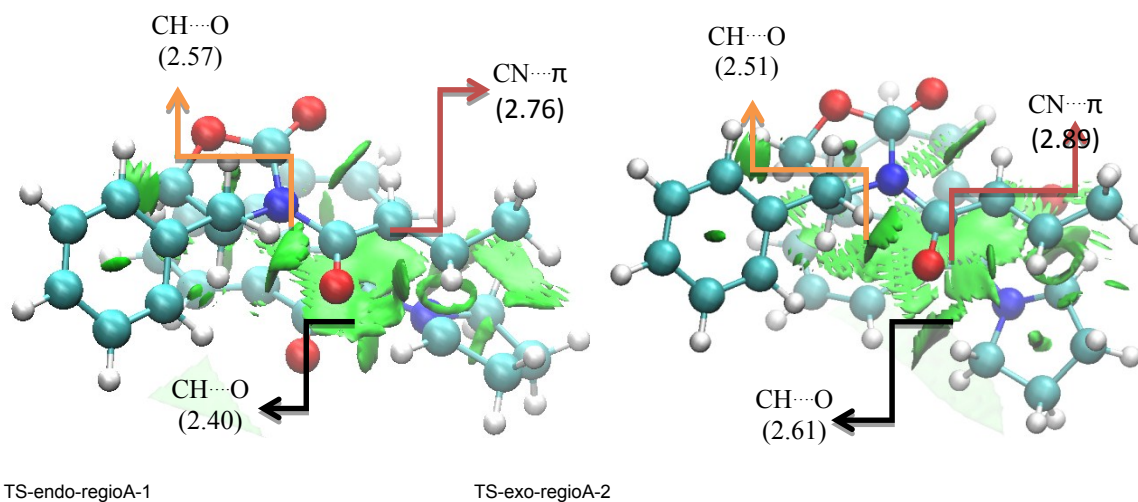

**Figure S2.** The NCI plots for the transition states TS-endo-regioA-1 and TS-exo-regioA-1 (Distances are given in parentheses (units in Å)).

**Table S6.** single-point energy calculations using B3LYP/6-31+G(d,p) PCM (CH<sub>2</sub>Cl<sub>2</sub>) (All data were reported in kcal mol<sup>-1</sup>).

| Structure's Name | $\Delta\Delta E^\ddagger$ | Structure's Name | $\Delta\Delta E^\ddagger$ |
|------------------|---------------------------|------------------|---------------------------|
| endo-regioA-1    | 0.0                       | exo-regioA-1     | 3.8                       |
| endo-regioA-2    | 0.8                       | exo-regioA-2     | 4.2                       |
| endo-regioB-1    | 4.3                       | exo-regioB-1     | 6.9                       |
| endo-regioB-2    | 3.7                       | exo-regioB-1     | 7.2                       |

# <sup>1</sup>H, <sup>13</sup>C NMR and HRMS spectra

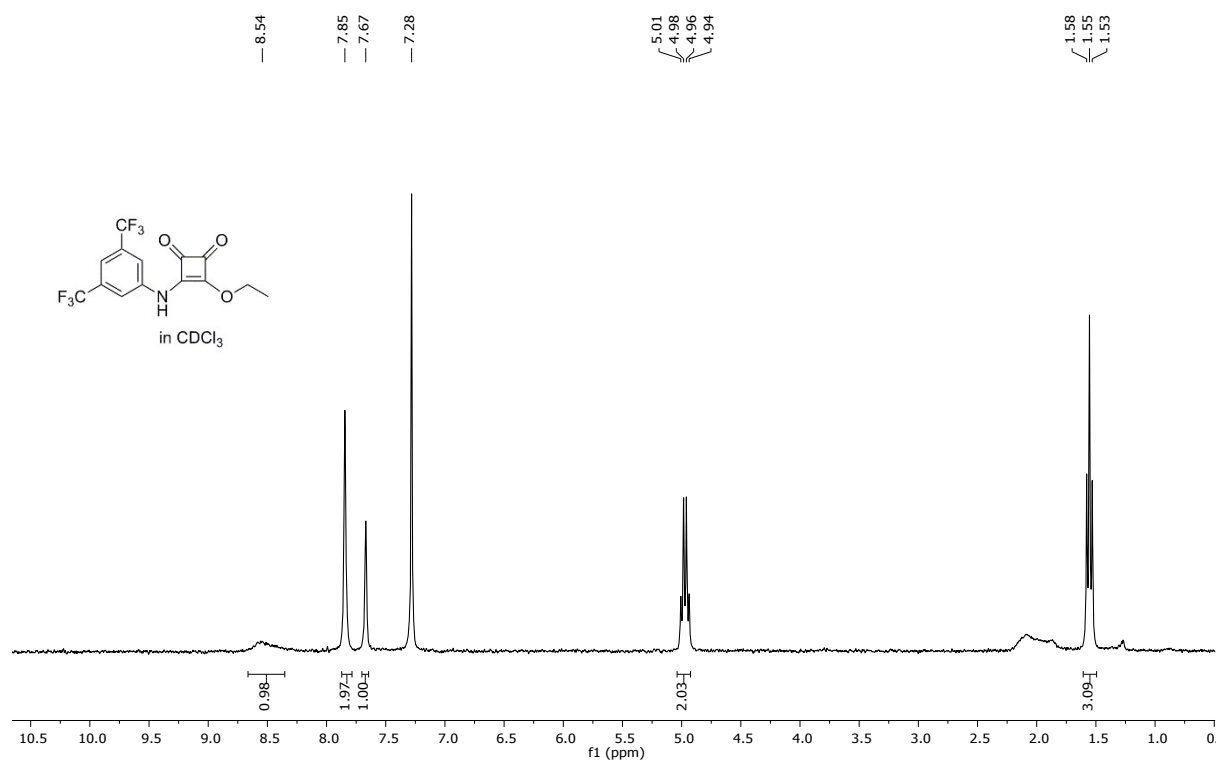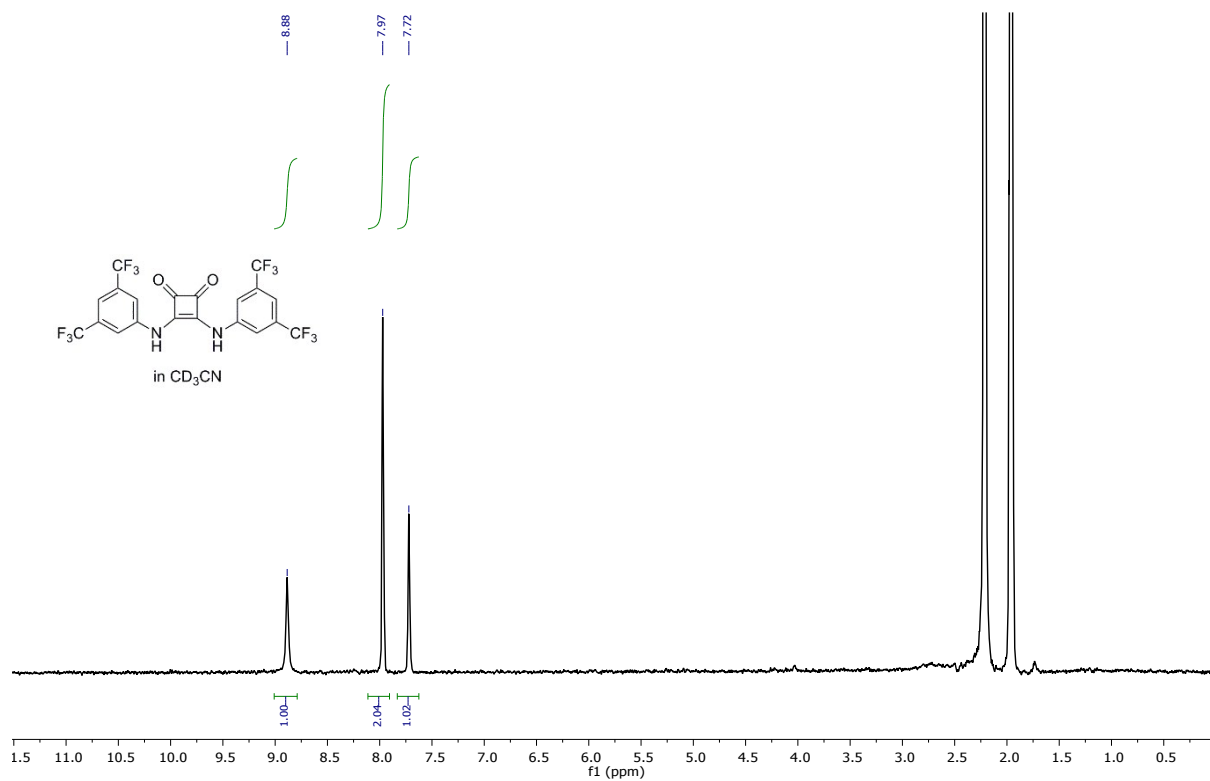

Shahrestani.fid  
Thio-cyclo6

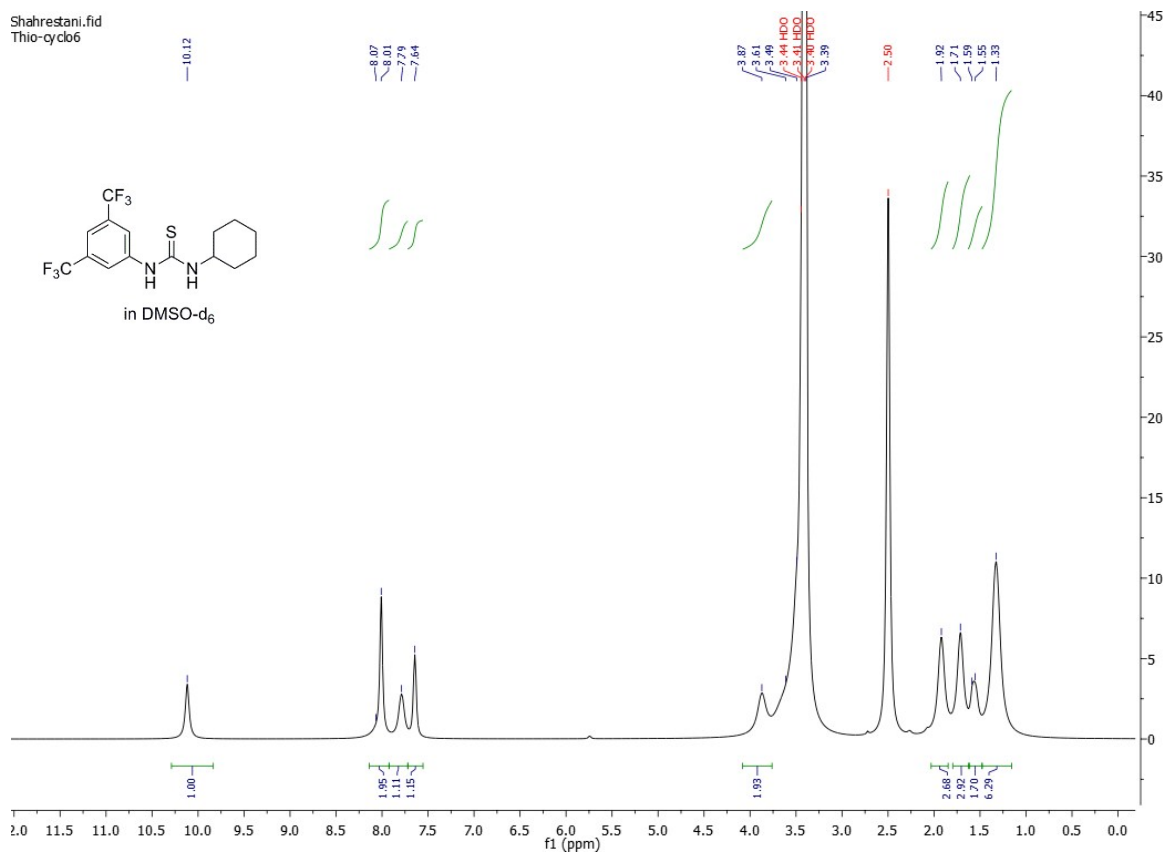

Shahrestani/15  
ThioCF3  
1H NMR

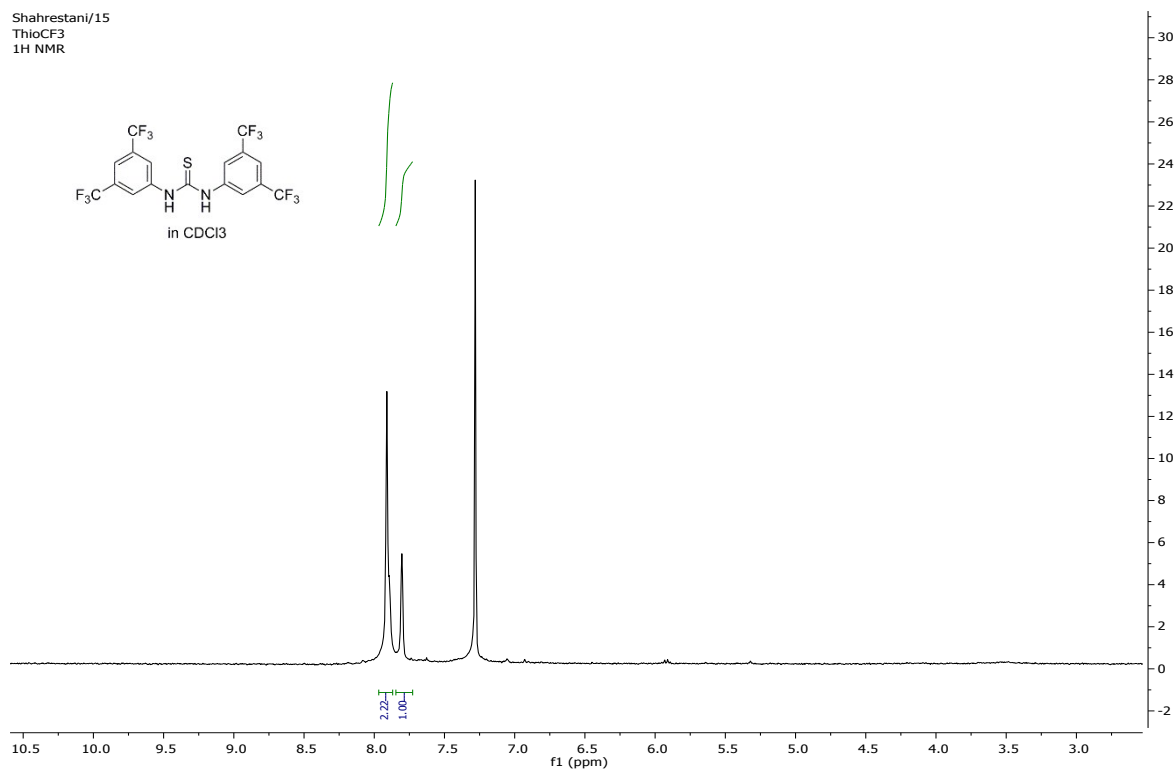

Shahrestani.fid  
Pr-CrO-OB  
1H NMR

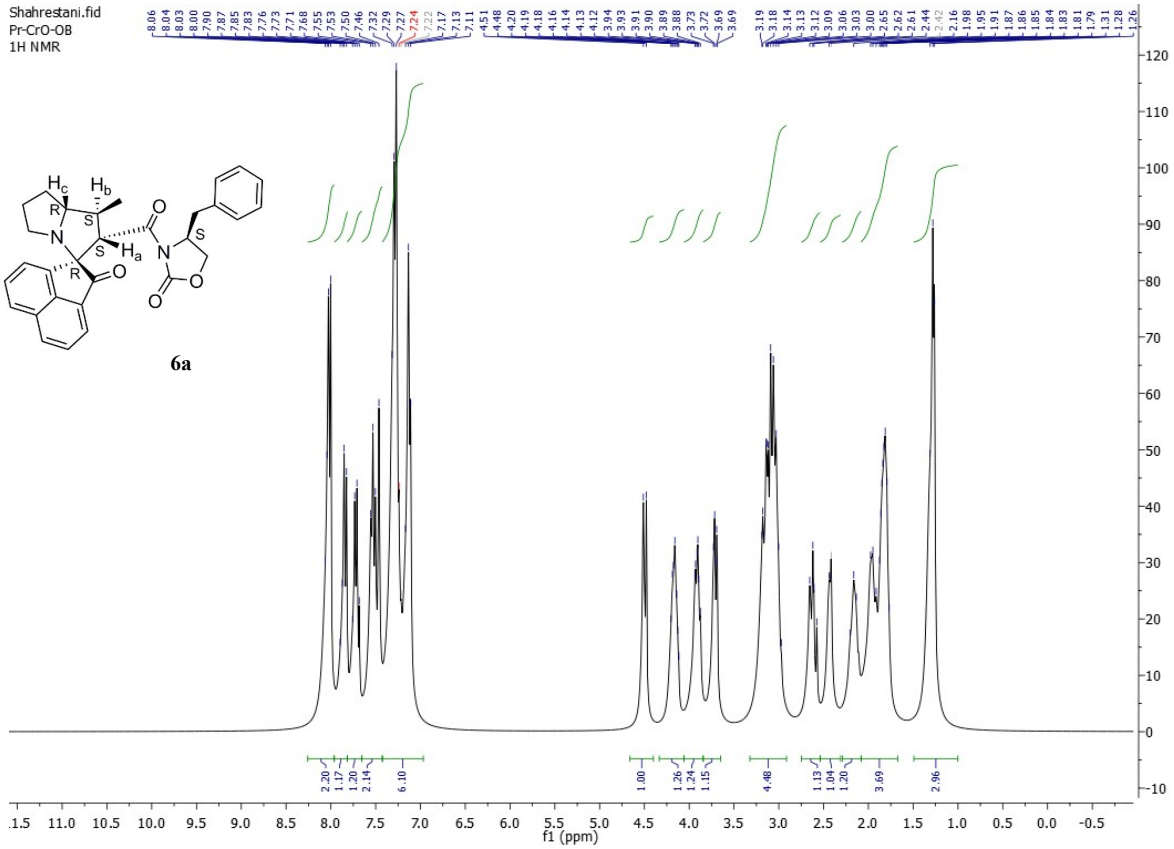

File : C:\MSDCHEM\4\DATA\Snapshot\64014861.D  
 Operator :  
 Acquired : 24 May 2014 8:00 using AcqMethod AZMUNSS  
 Instrument : Instrumen  
 Sample Name: E  
 Misc Info :  
 Vial Number: 1

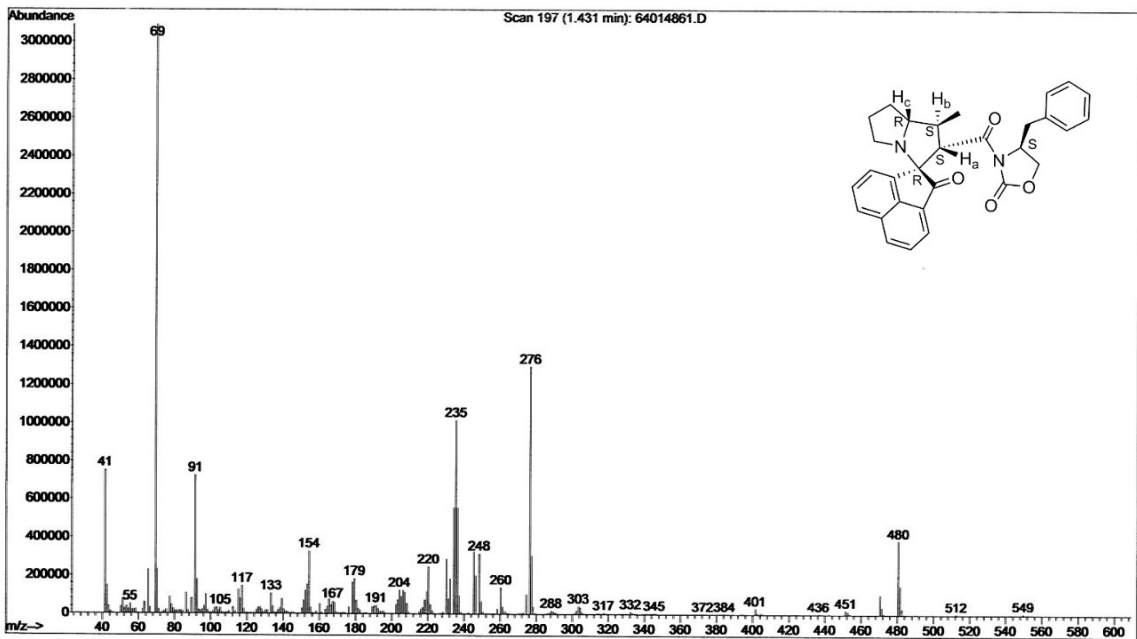

A-Pro-Crot-OXB  
<sup>13</sup>C{<sup>1</sup>H} NMR

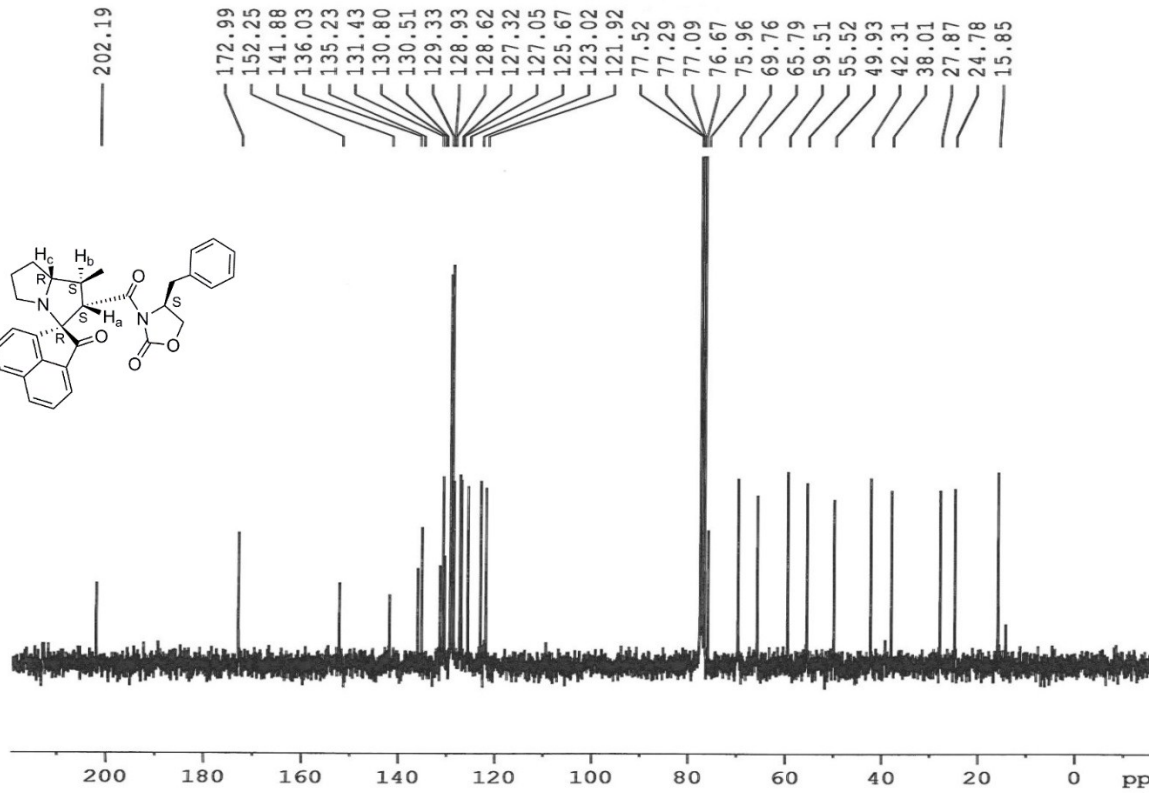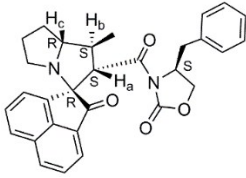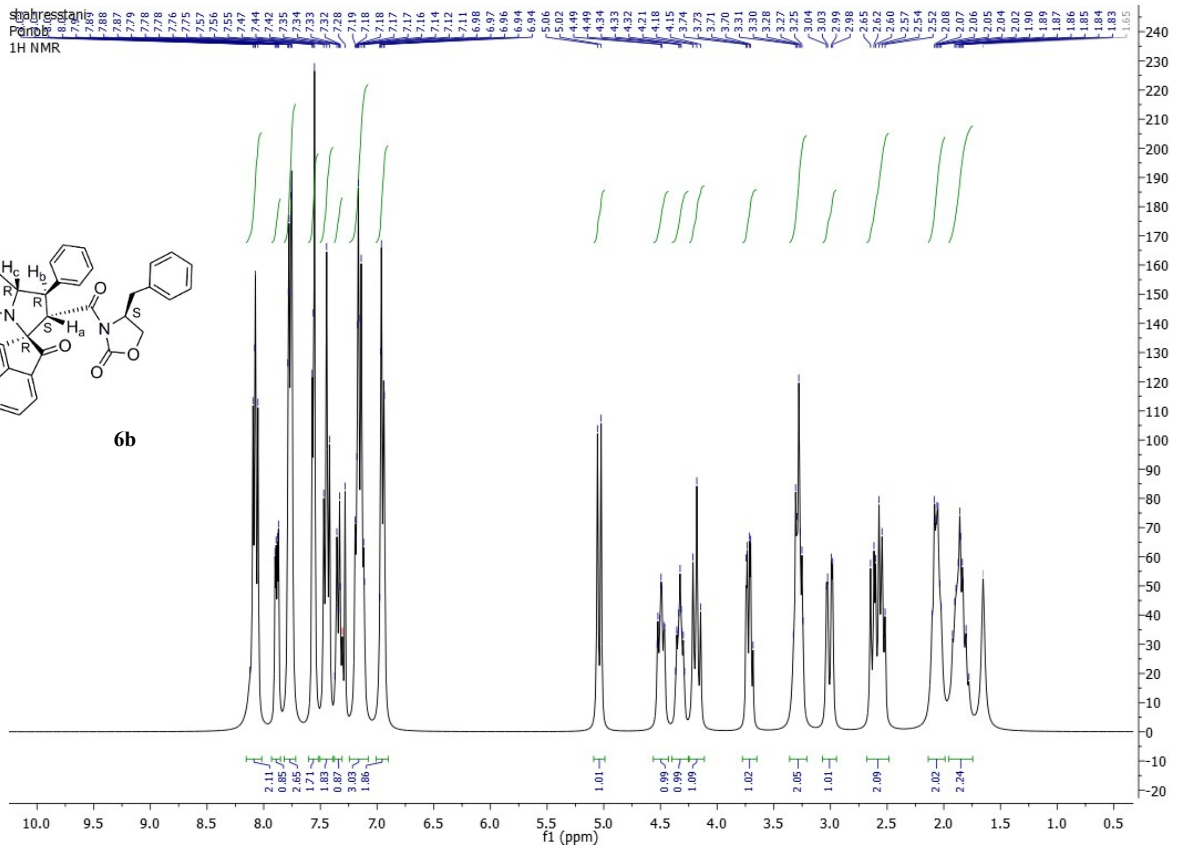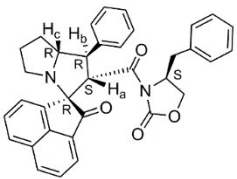

6b



File : C:\MSDCHEM\4\DATA\64014857.D  
 Operator :  
 Acquired : 24 May 2014 7:41 using AcqMethod AZMUNSS  
 Instrument : Instrumen  
 Sample Name : A  
 Misc Info :  
 Vial Number : 1

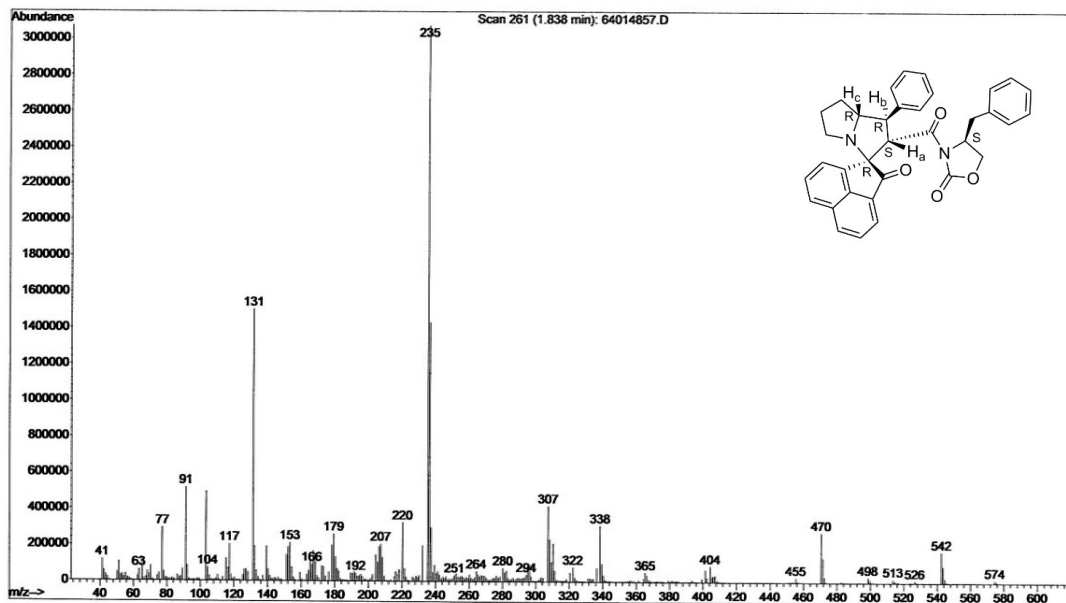

A-Pro-Cin-OXBn  
 1H NMR

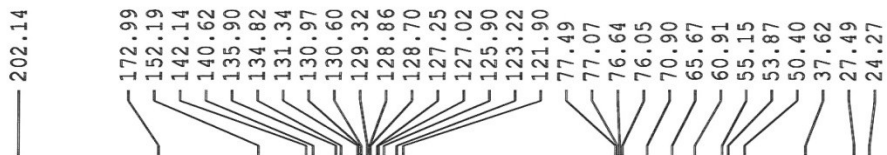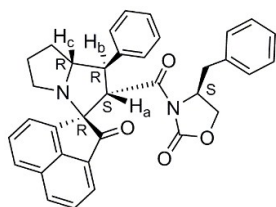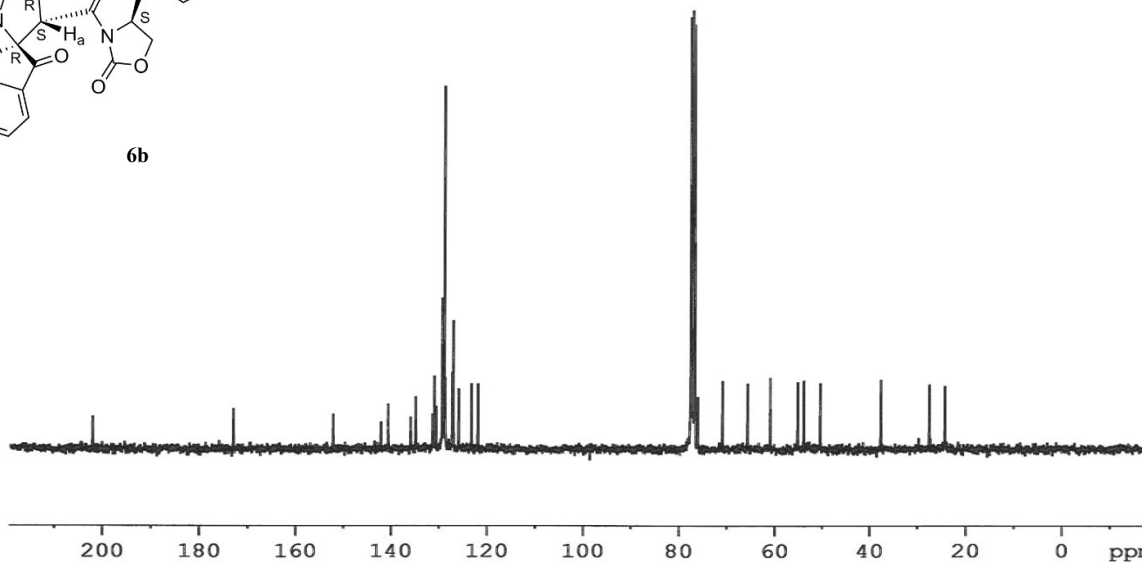

Shahrestani.fid  
Pro-ClcIn-OB  
1H NMR

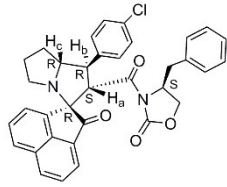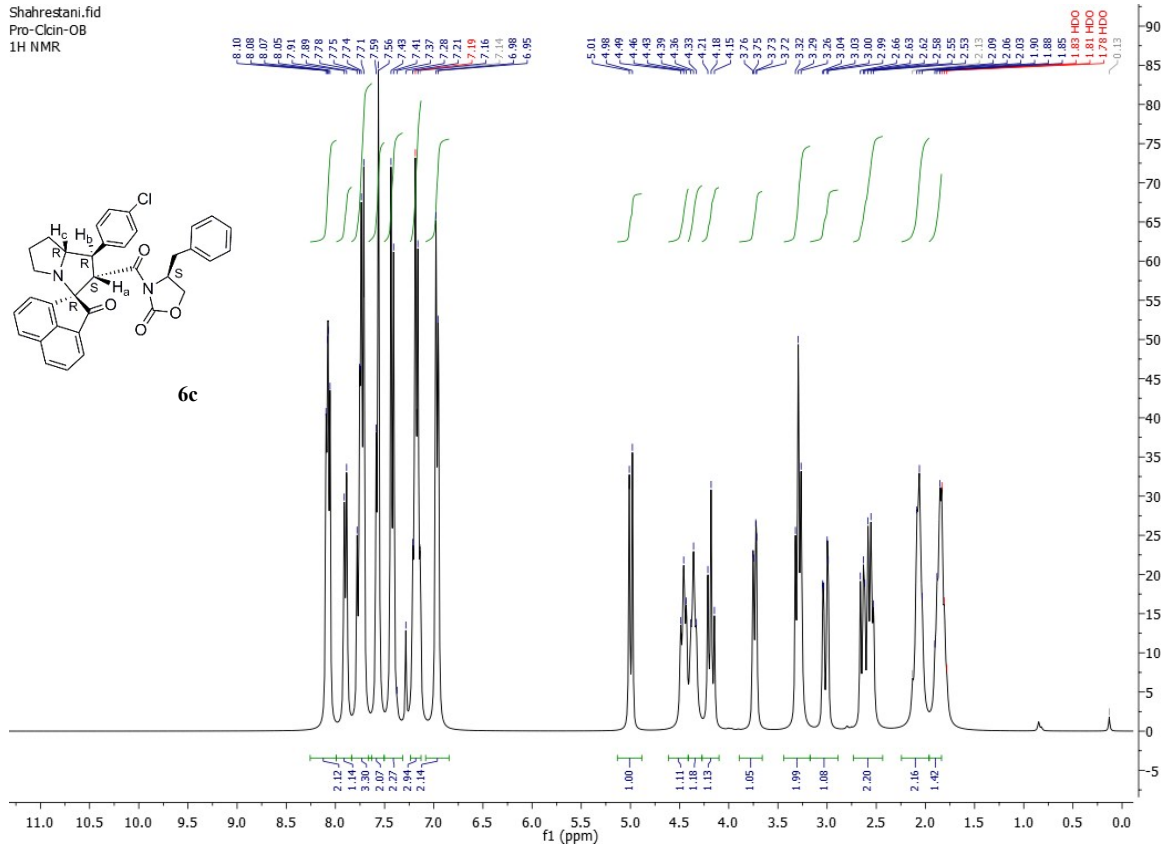

Shahrestani.80.fid  
Pro-ClcIn-OB  
13C(1H) NMR

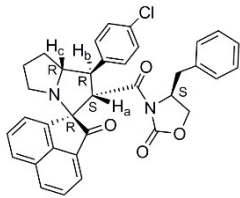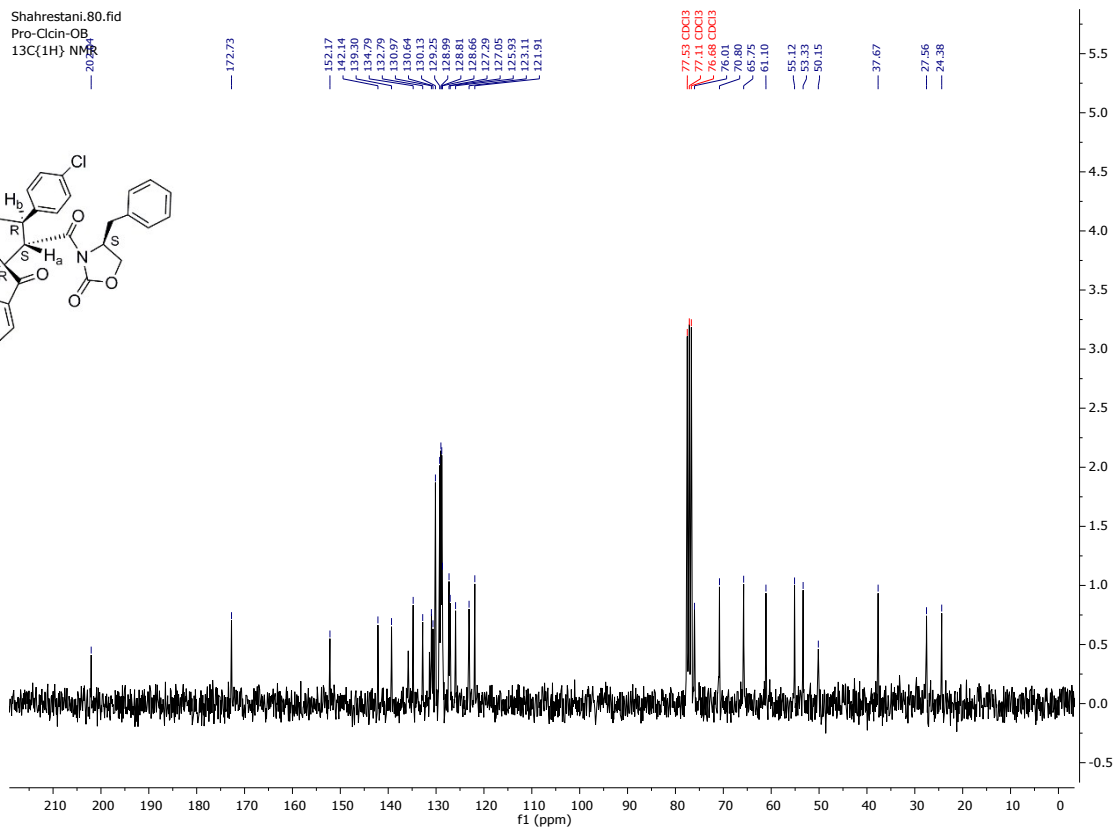

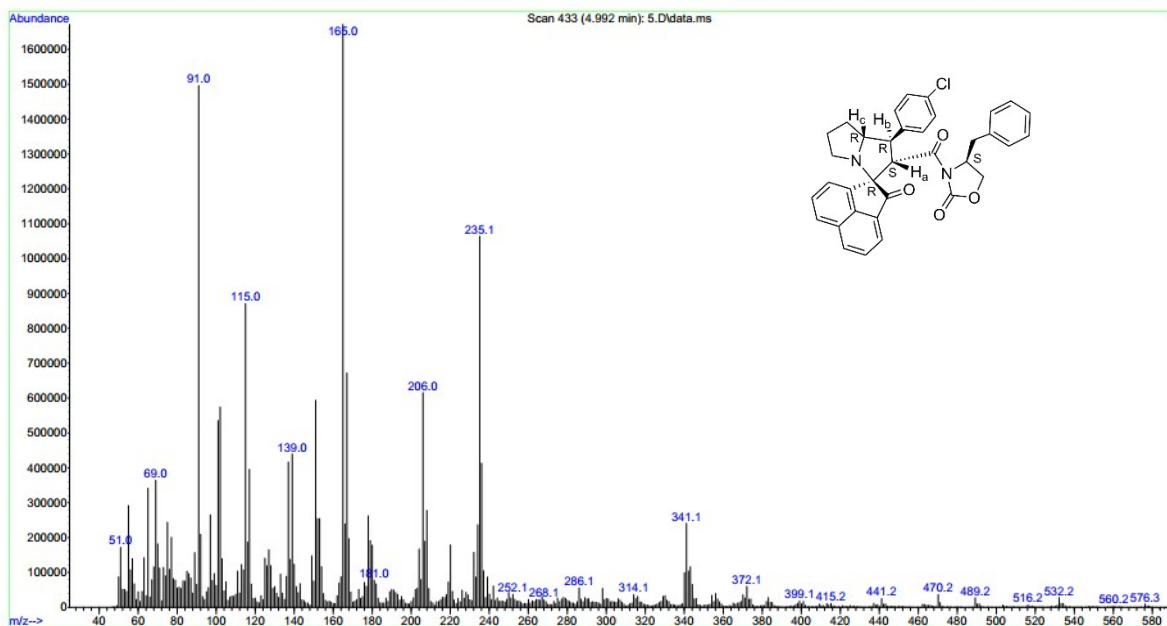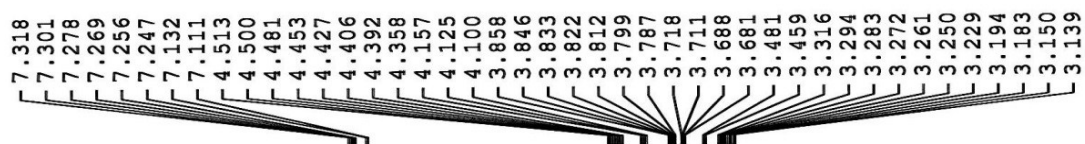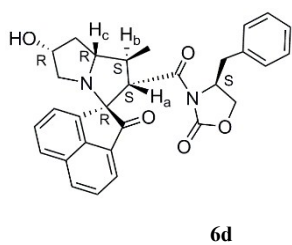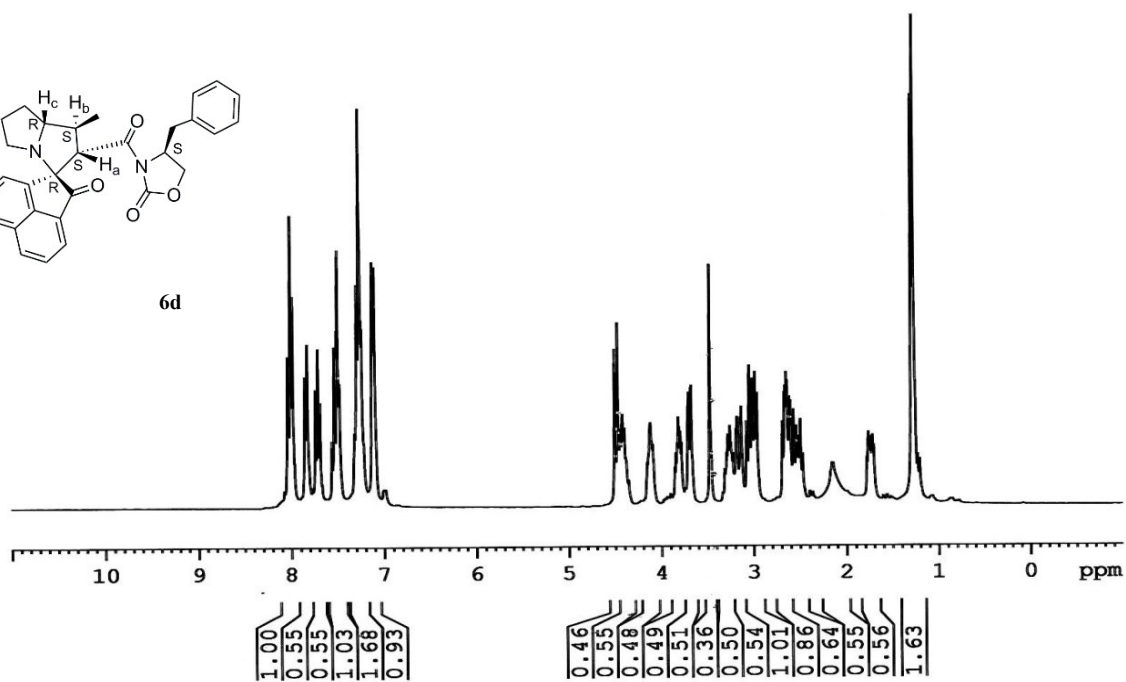

File : C:\MSDCHEM\4\DATA\Snapshot\64014862.D  
 Operator :  
 Acquired : 24 May 2014 8:04 using AcqMethod AZMUNSS  
 Instrument : Instrumen  
 Sample Name: G  
 Misc Info :  
 Vial Number: 1

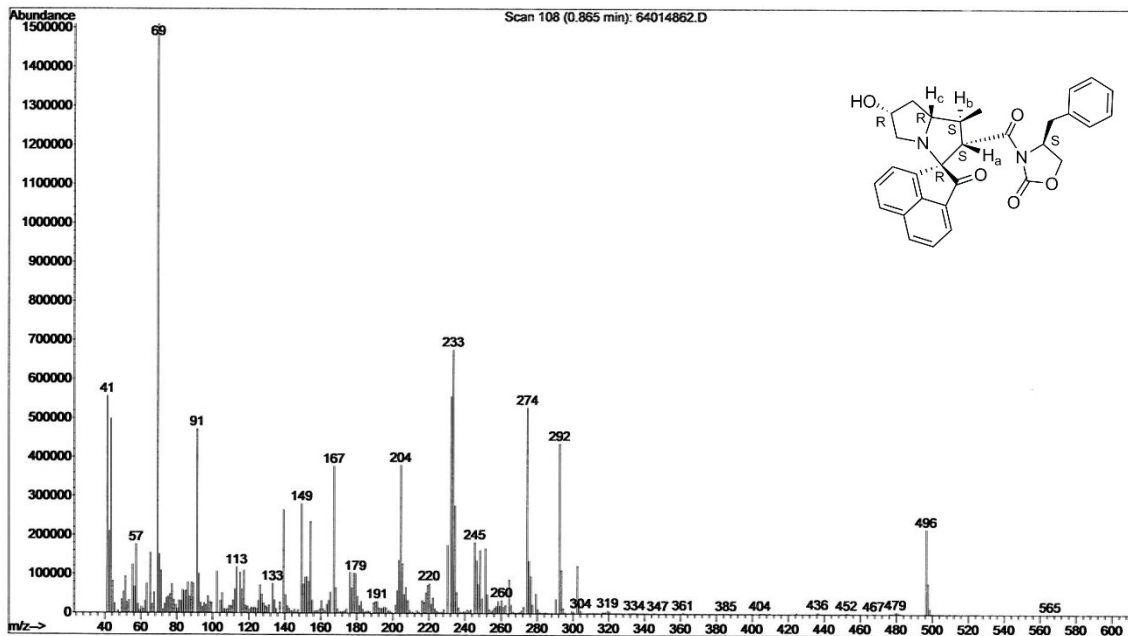

ProH-Cr-OXBn  
 1H NMR

202.52  
 172.57  
 152.28  
 141.81  
 135.65  
 135.17  
 131.31  
 130.89  
 130.46  
 129.34  
 128.93  
 128.67  
 127.34  
 127.25  
 125.73  
 122.92  
 122.16  
 88.59  
 77.49  
 77.07  
 76.65  
 75.29  
 72.77  
 69.13  
 65.79  
 59.77  
 56.93  
 55.52  
 43.02  
 38.11  
 37.93  
 15.83

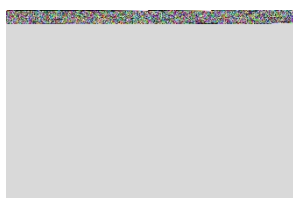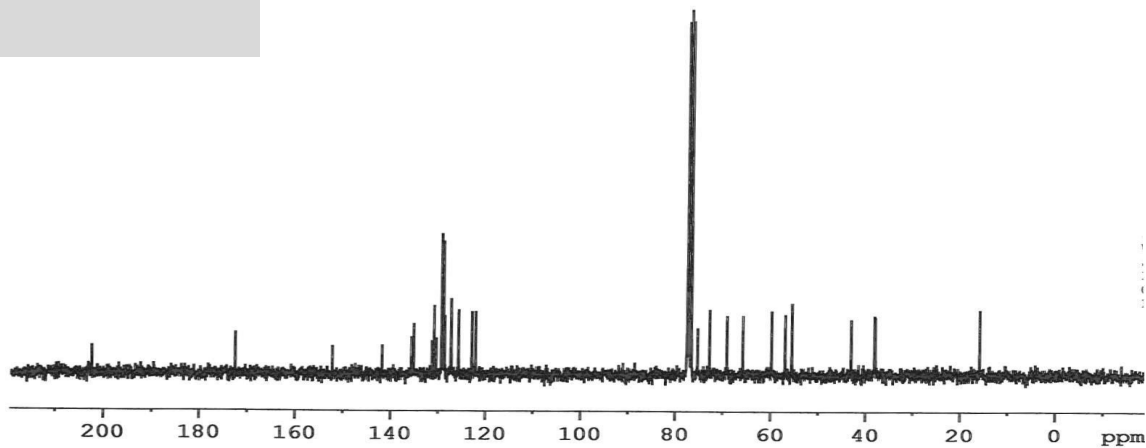

7.438  
7.413  
7.355  
7.330  
7.306  
7.281  
7.184  
7.174  
7.161  
7.153  
7.128  
7.113  
7.107  
7.100  
6.942  
6.920  
5.311  
5.058  
5.027  
4.503  
4.468  
4.438  
4.420  
4.410  
4.396  
4.386  
4.311  
4.282  
4.266  
4.254  
3.725  
3.716  
3.695  
3.686  
3.259  
3.231  
3.205  
3.182  
3.018  
3.008  
2.973  
2.963  
2.814

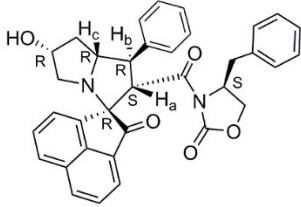

6e

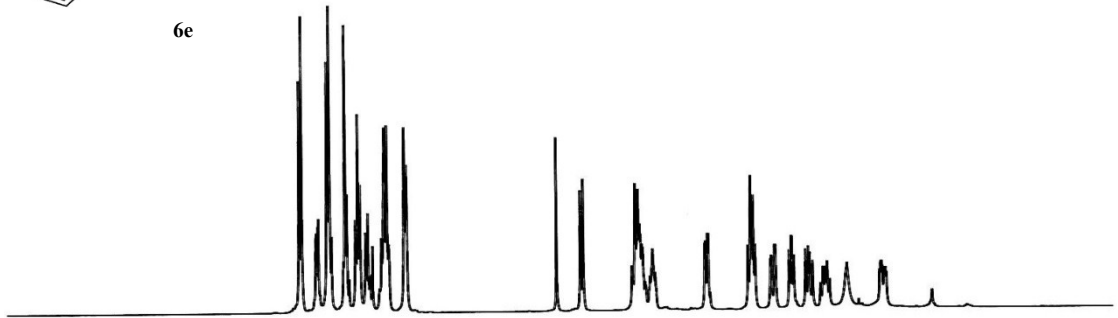

11 10 9 8 7 6 5 4 3 2 1 0 ppm

1.00  
0.53  
1.53  
1.04  
0.61  
1.48  
0.97  
0.24  
0.48  
1.50  
0.49  
0.51  
0.98  
0.50  
0.51  
0.52  
0.53  
0.46  
0.57

File : C:\MSDCHEM\4\DATA\64013992.D  
Operator :  
Acquired : 27 Dec 2013 9:51 using AcqMethod TEST ARI  
Instrument : Instrumen  
Sample Name: A  
Misc Info :  
Vial Number: 1

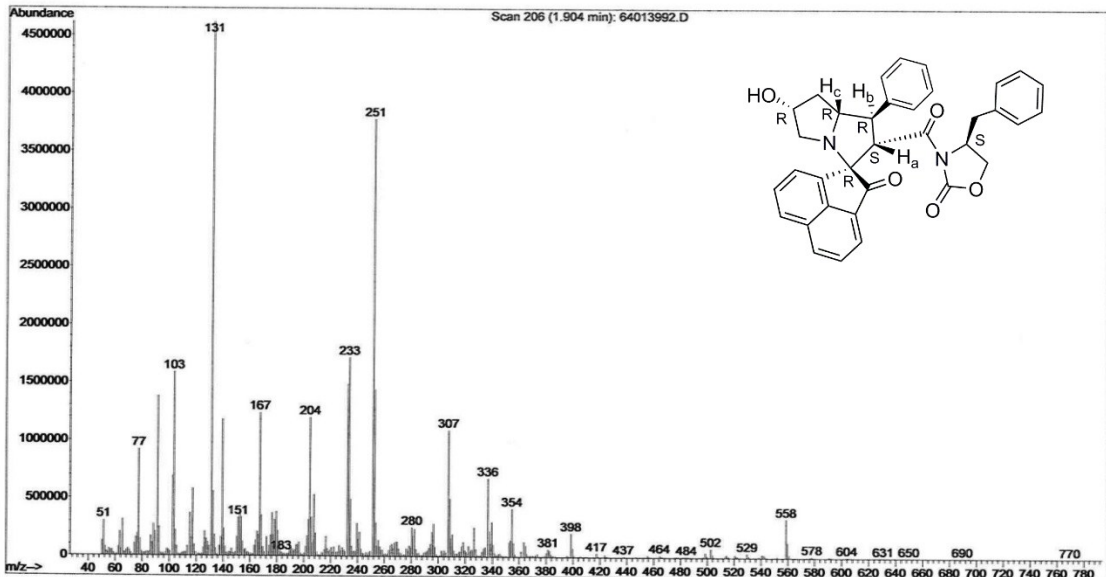

A-ProH-Cin-OXB  
1H NMR

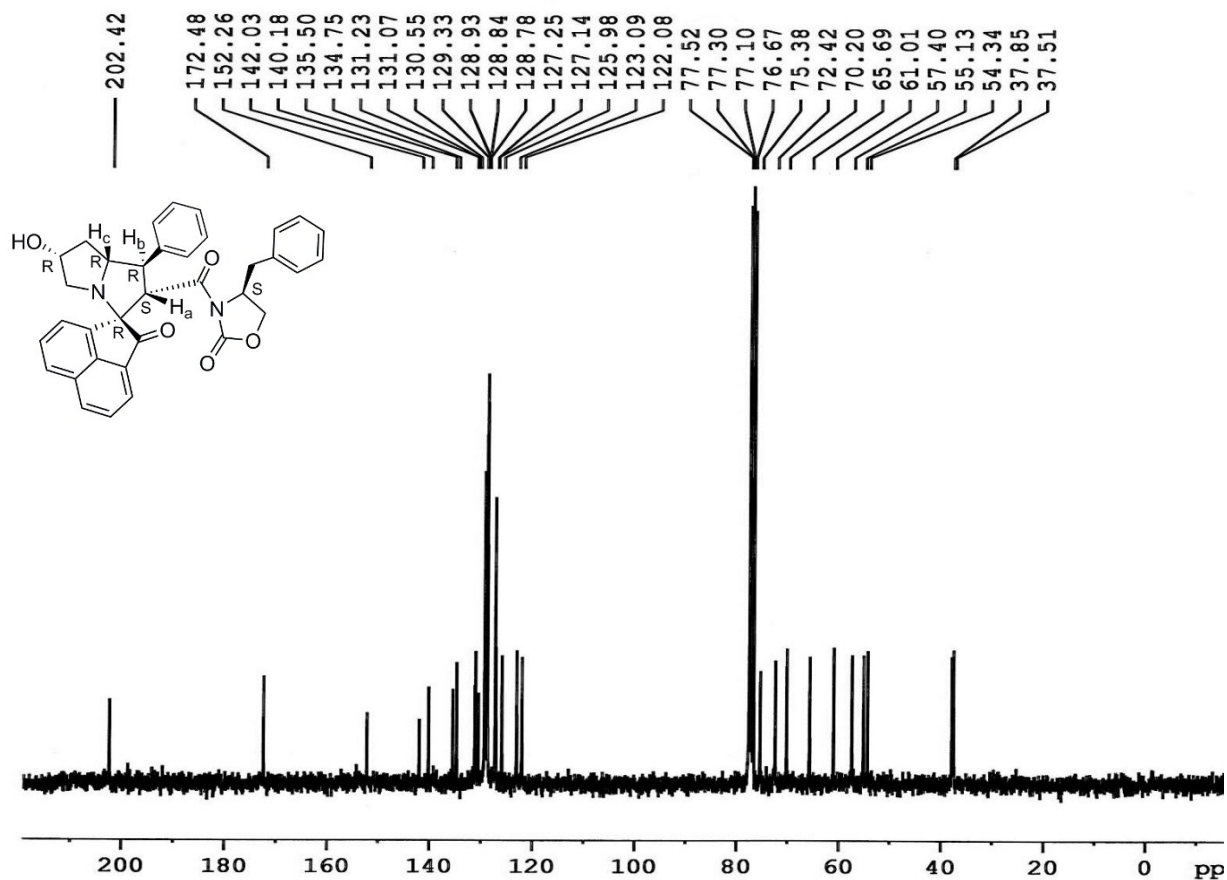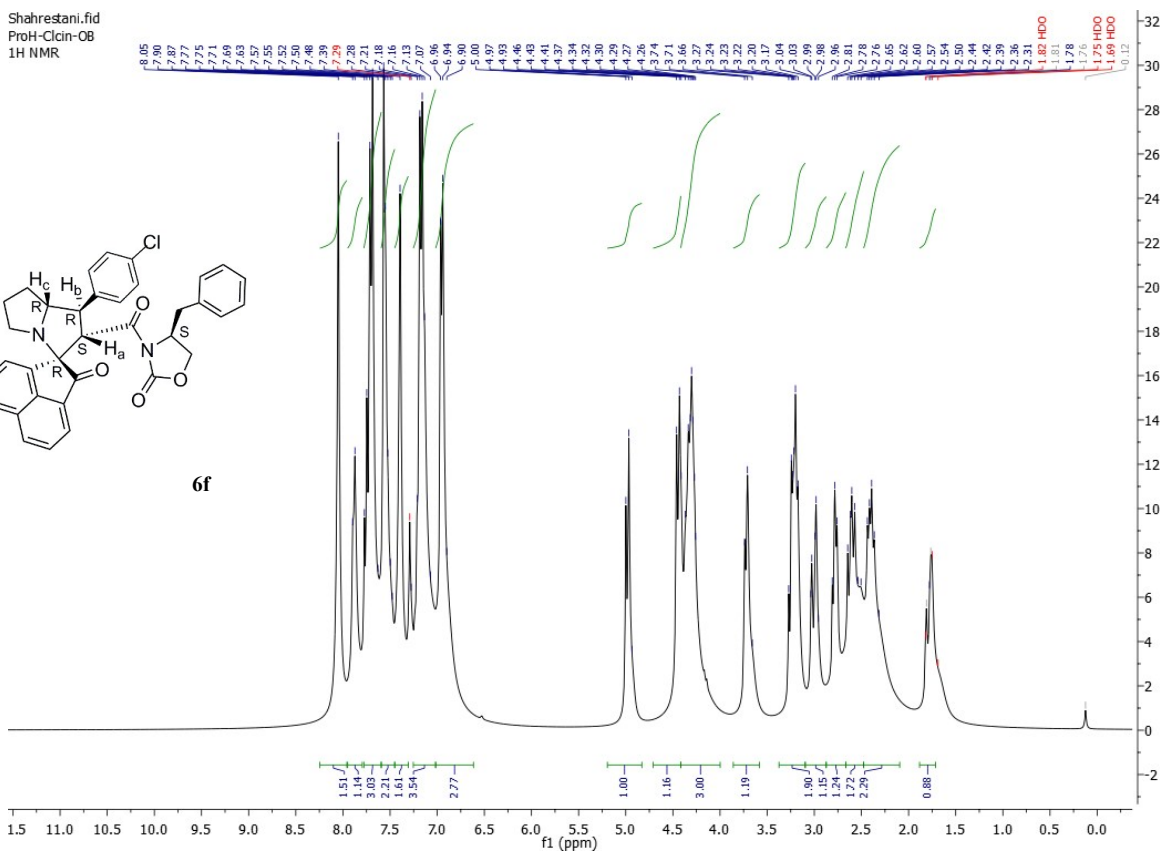



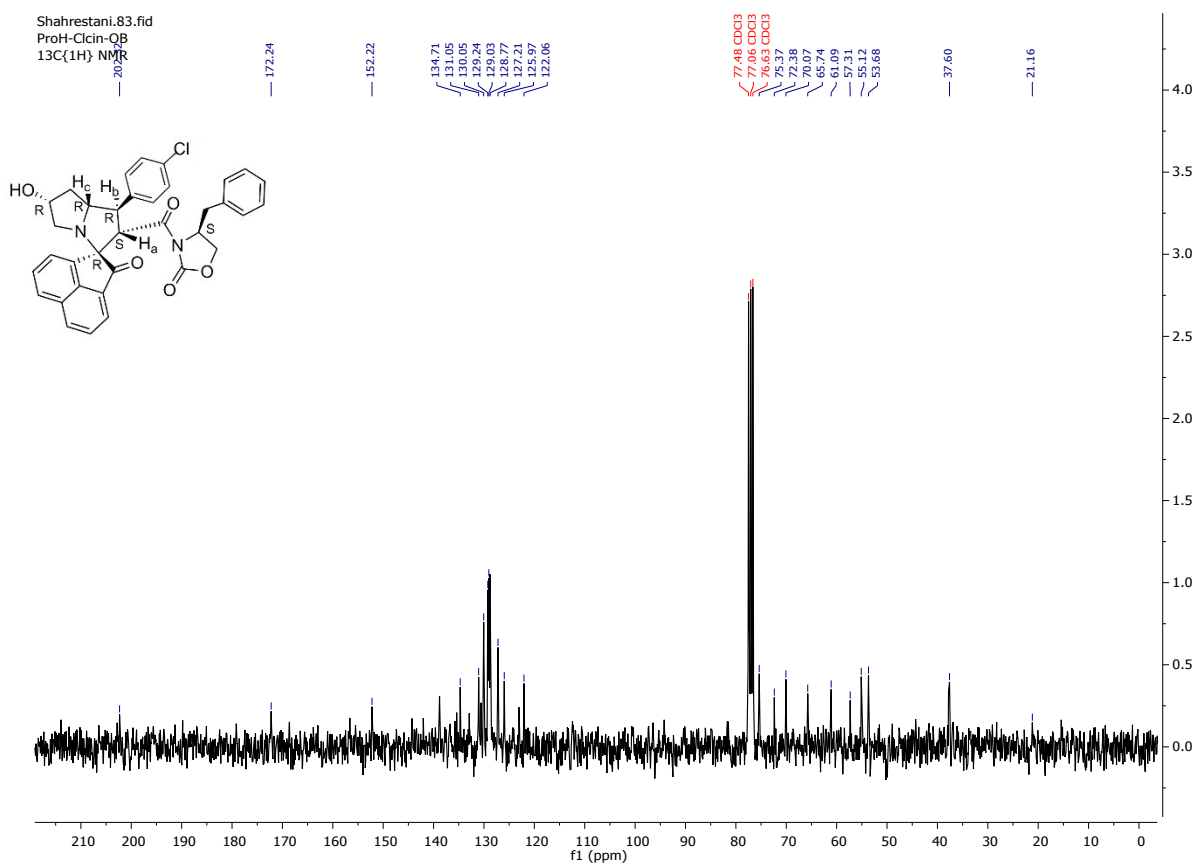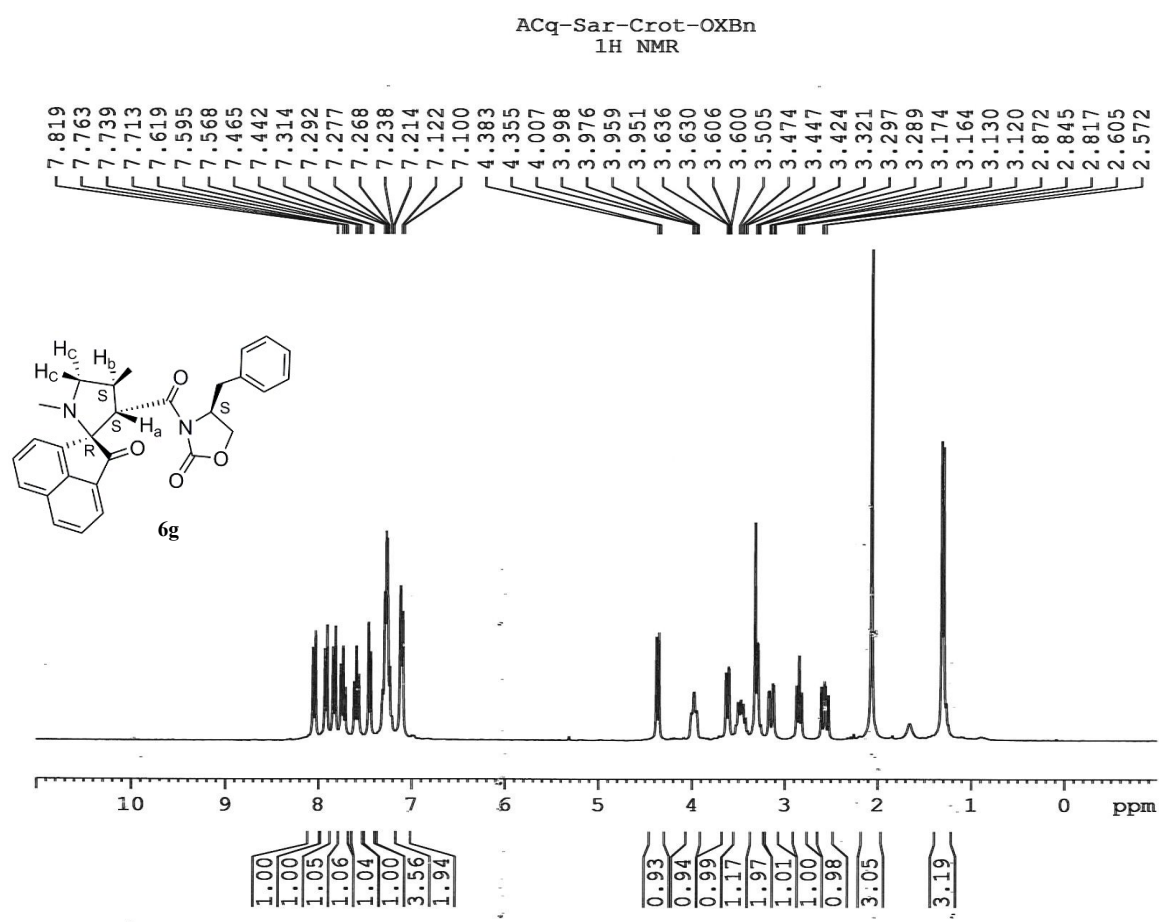

File : C:\MSDCHEM\4\DATA\Snapsho\64014863.D  
 Operator :  
 Acquired : 24 May 2014 8:07 using AcqMethod AZMUNSS  
 Instrument : Instrumen  
 Sample Name: F  
 Misc Info :  
 Vial Number: 1

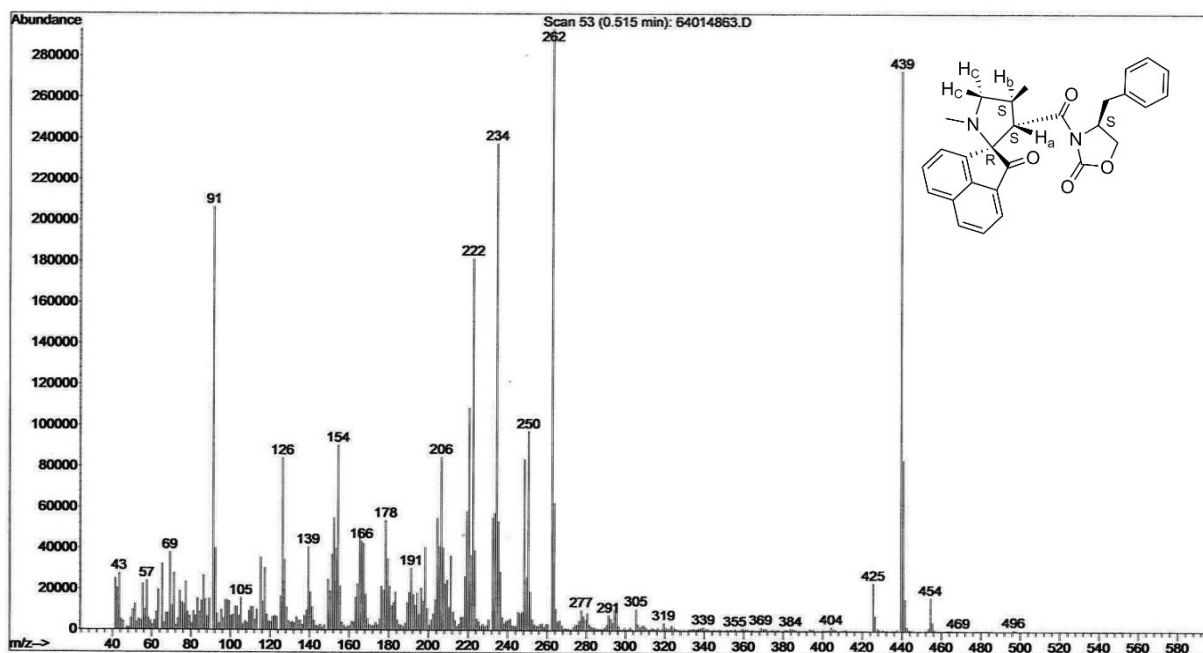

A-Sar-cROT-OXB  
<sup>13</sup>C{<sup>1</sup>H} NMR

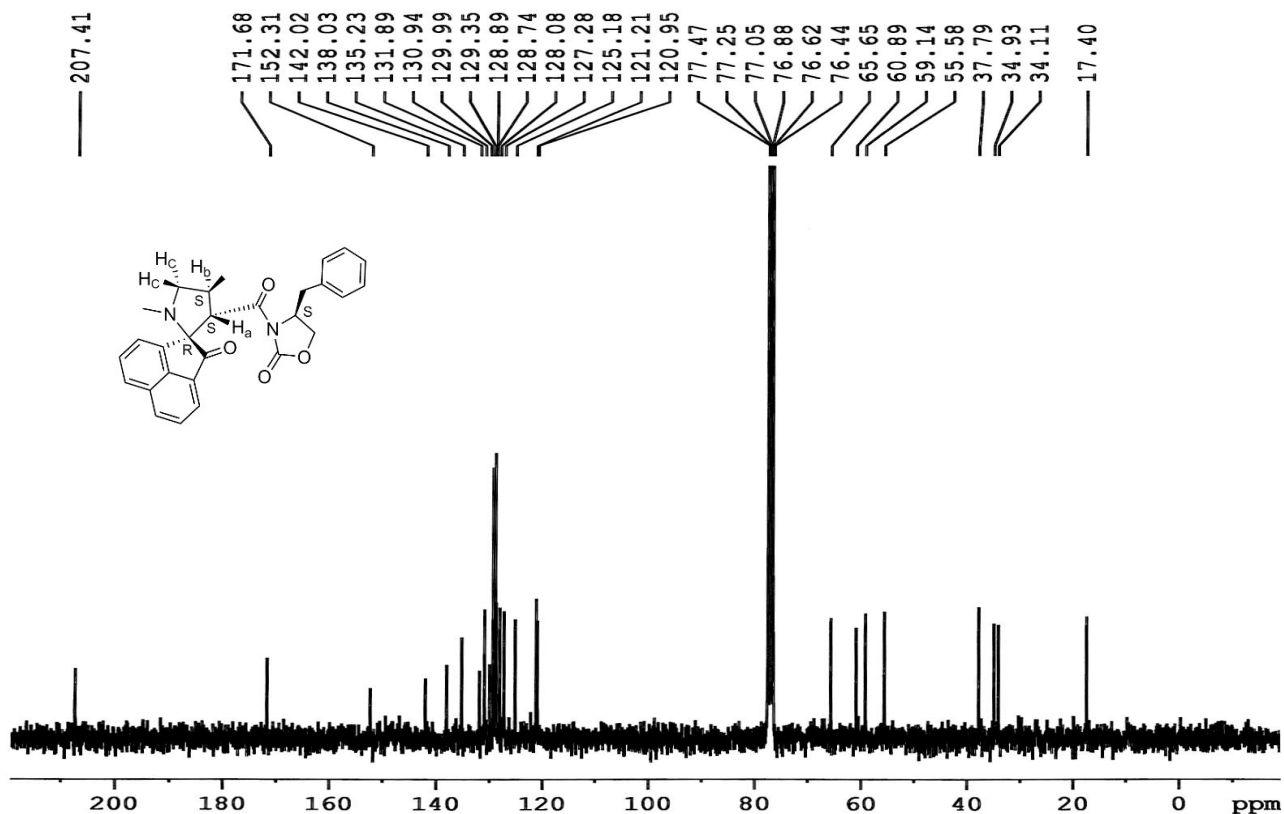



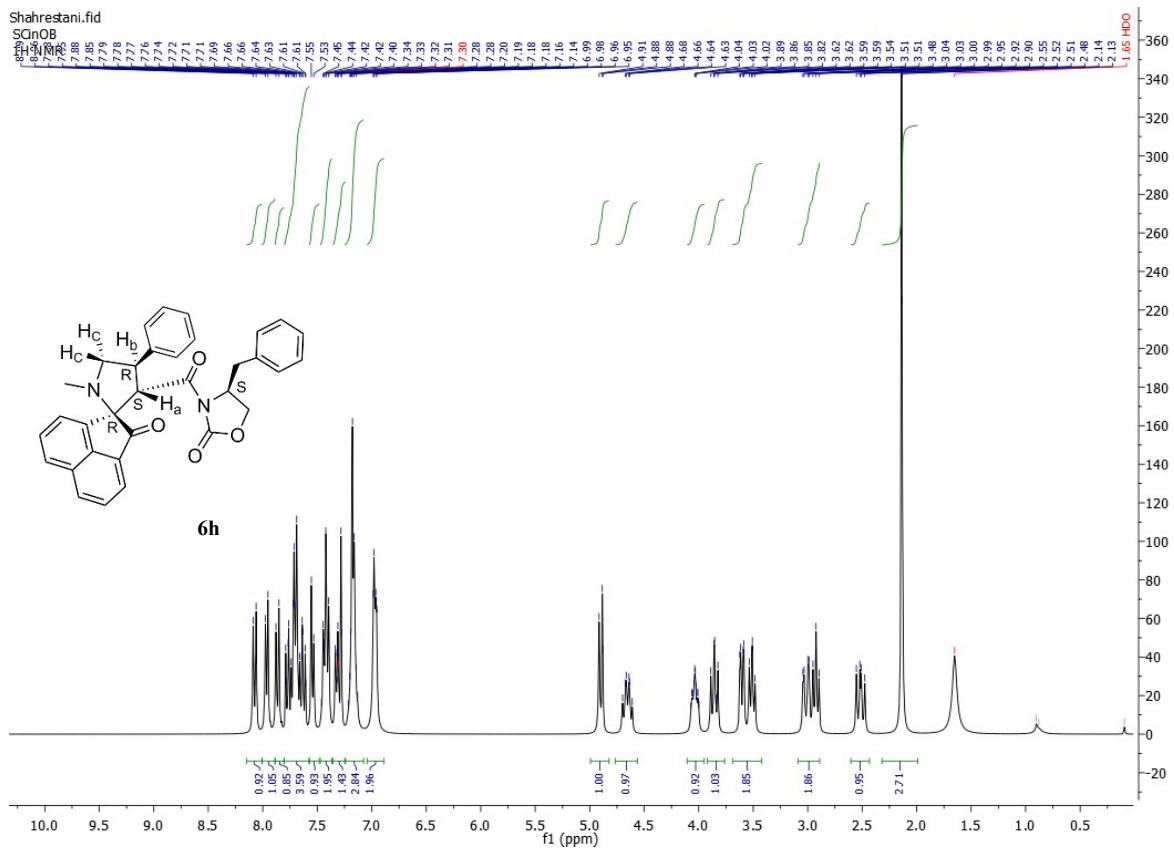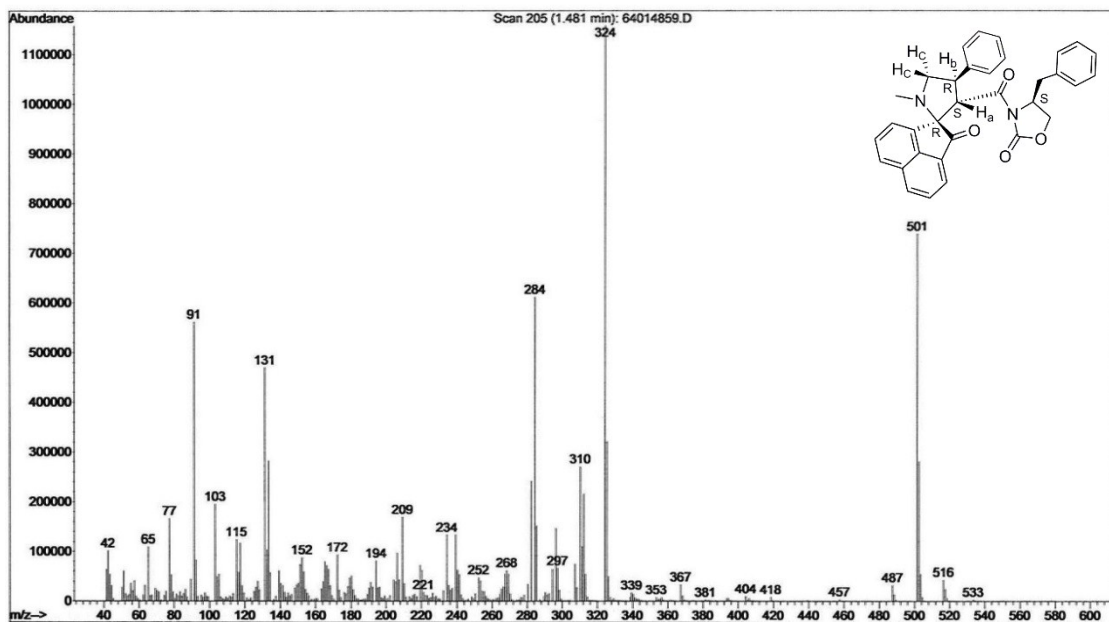

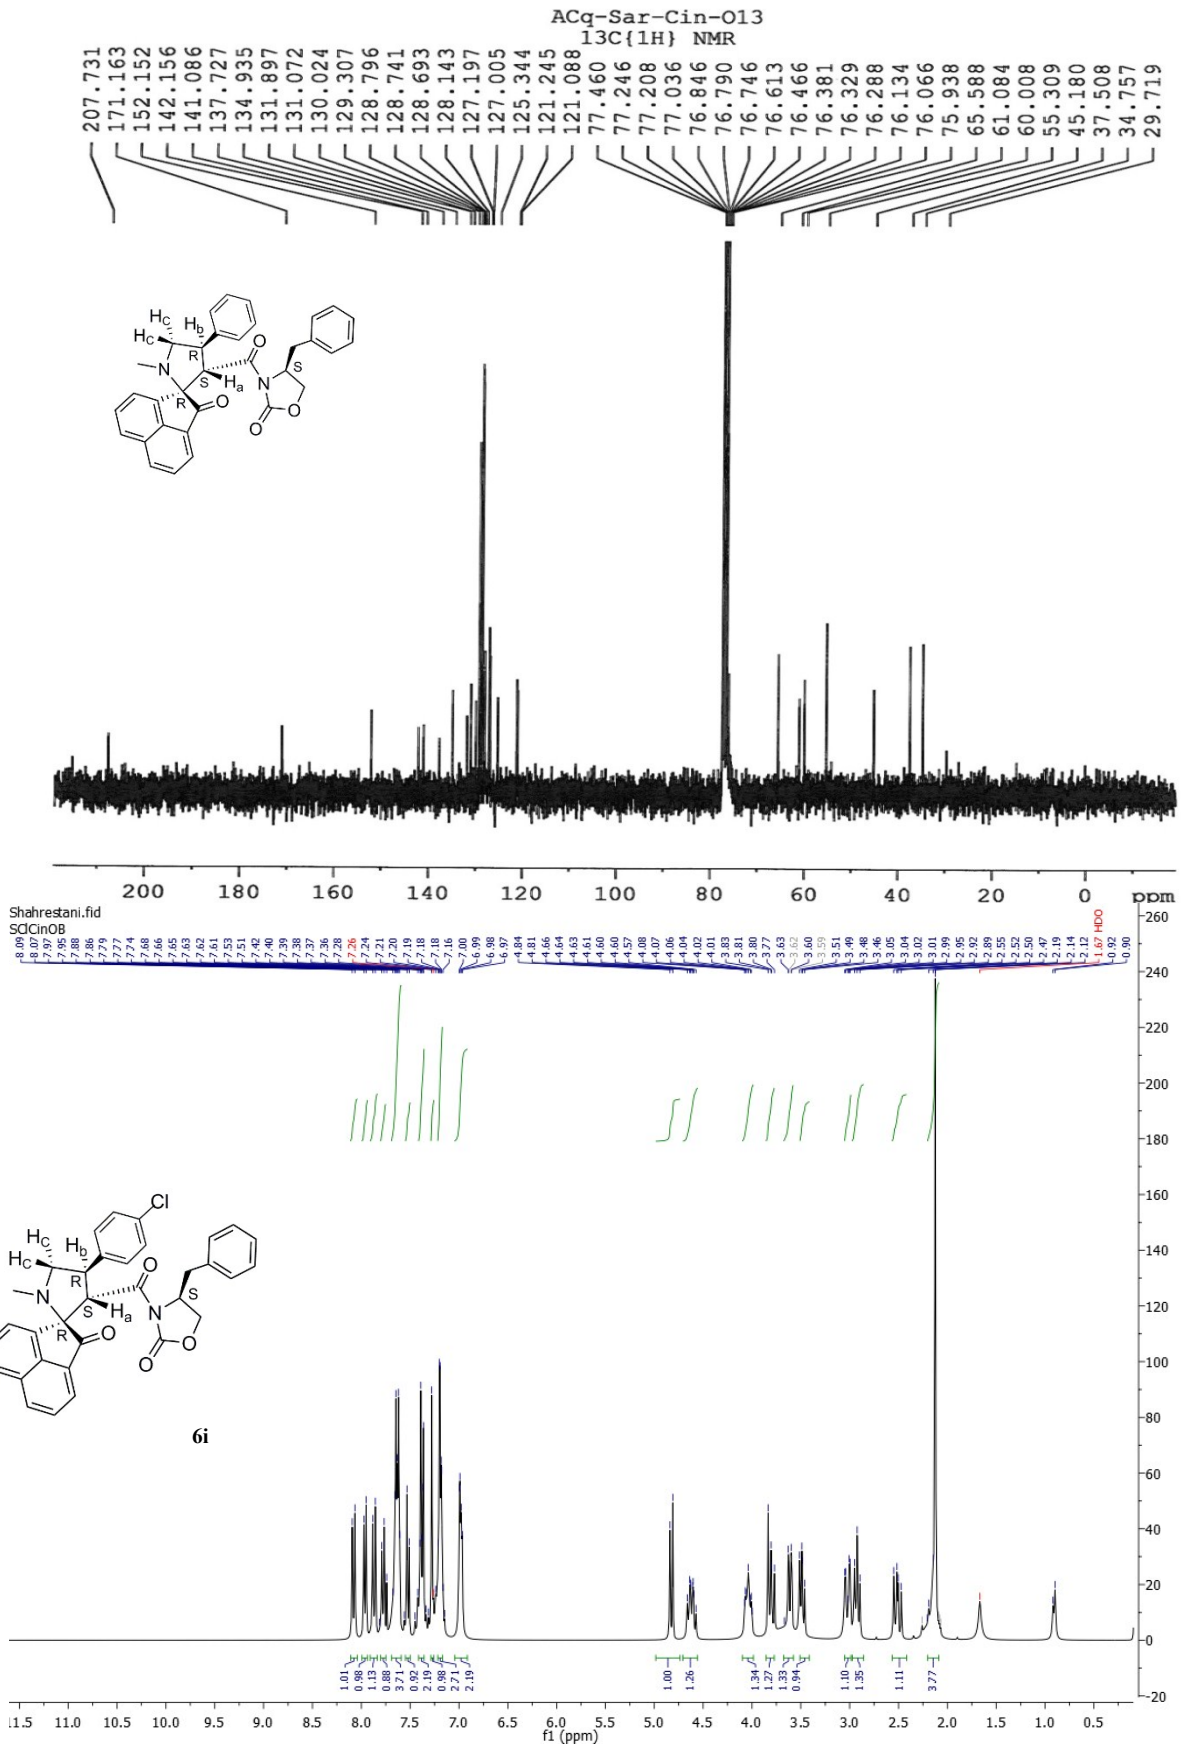

Shahrestani.94.fid  
S-clcin-OB  
13C{1H} NMR

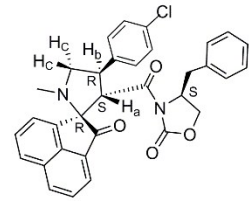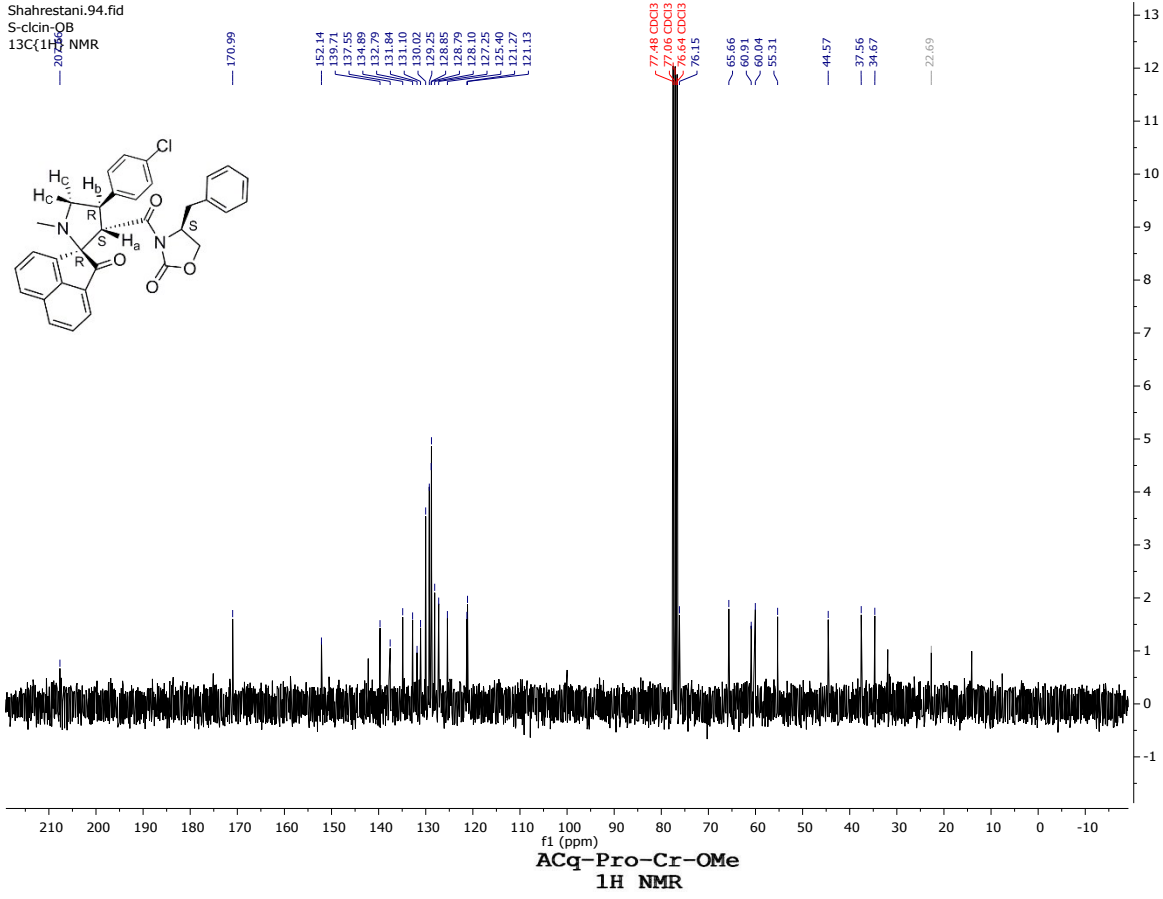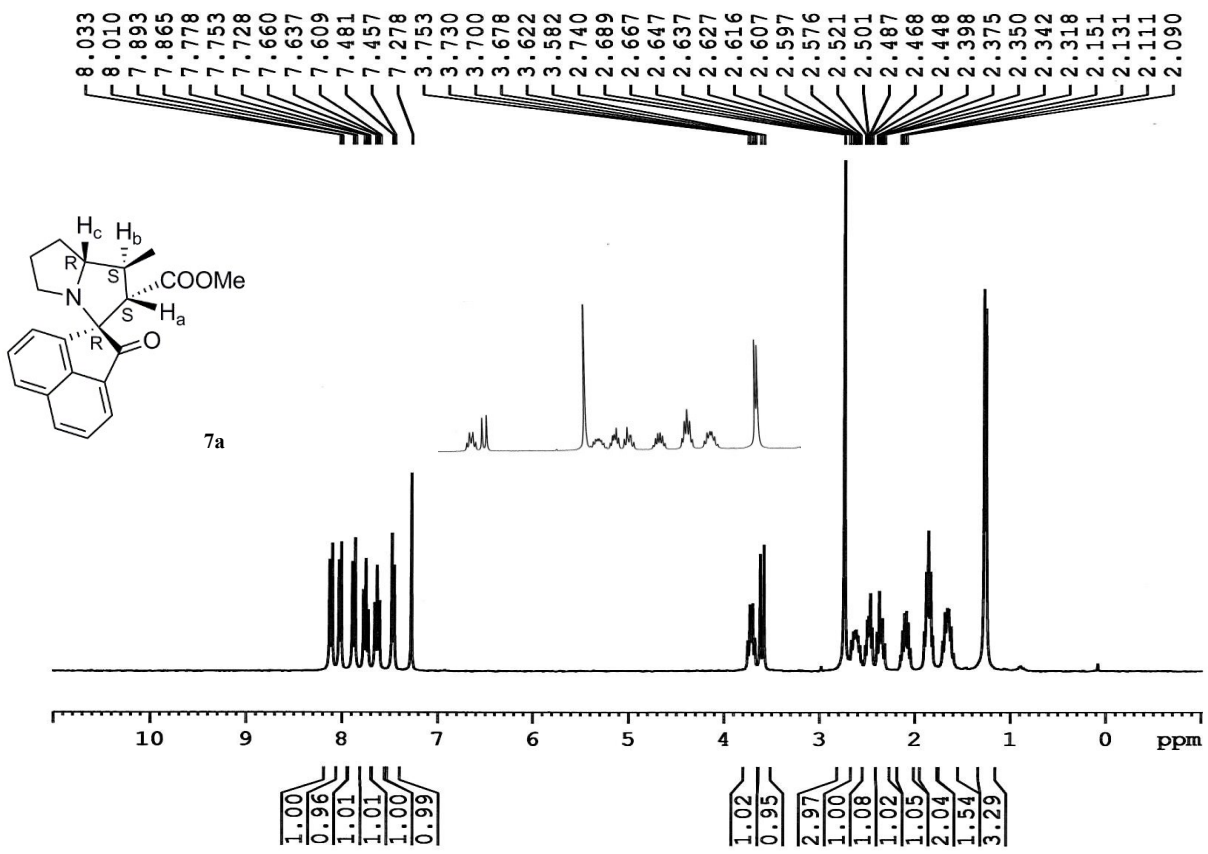

Shahrestani\_99.fid  
 Pr-Crot-OM  
 13C{1H} NMR

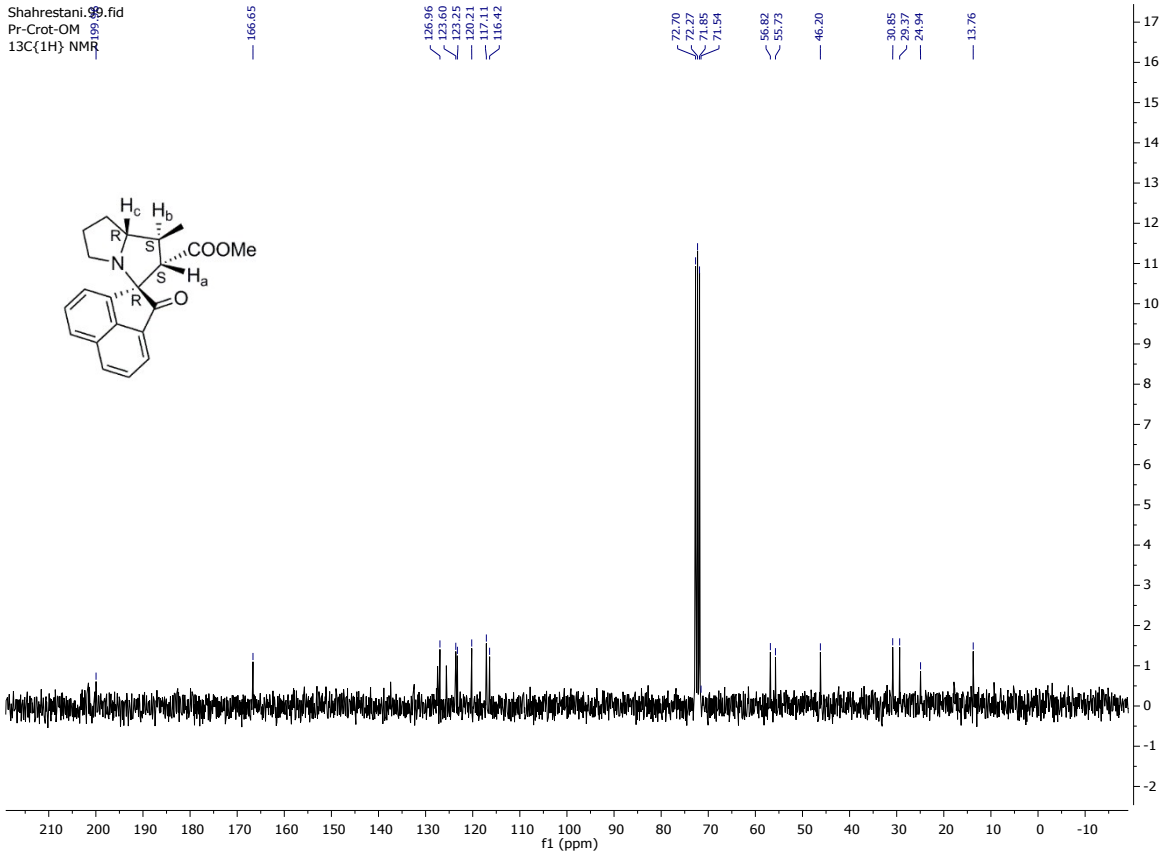

File :C:\MSDCHEM\3\DATA\30000314.D  
 Operator :  
 Acquired : 27 Nov 2014 8:22 using AcqMethod NORMAL  
 Instrument : Instrumen  
 Sample Name: A  
 Misc Info :  
 Vial Number: 1

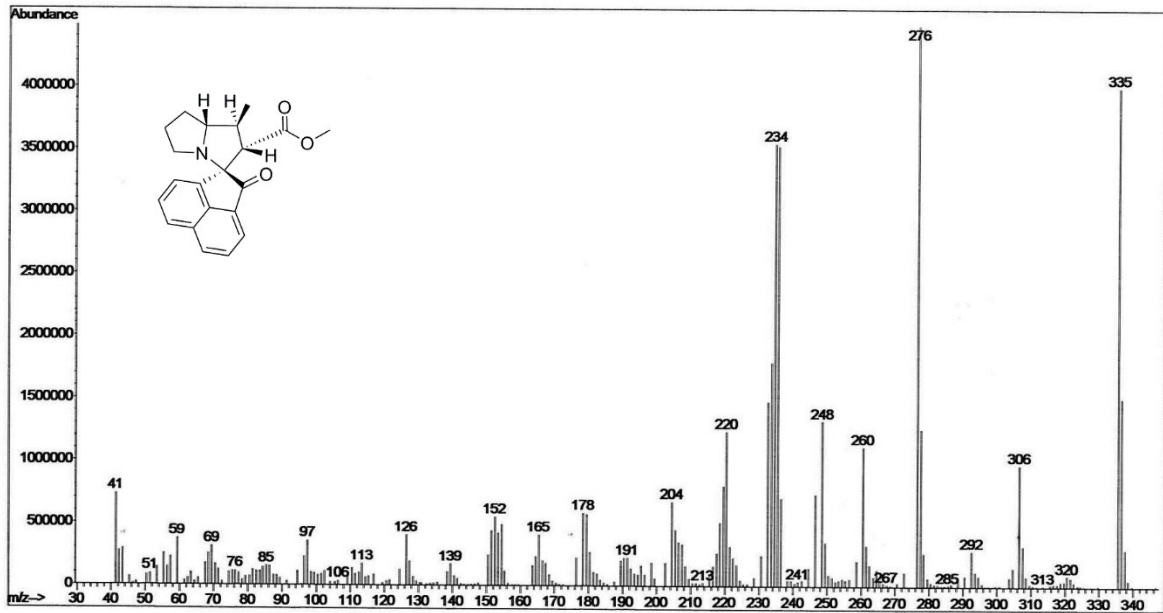

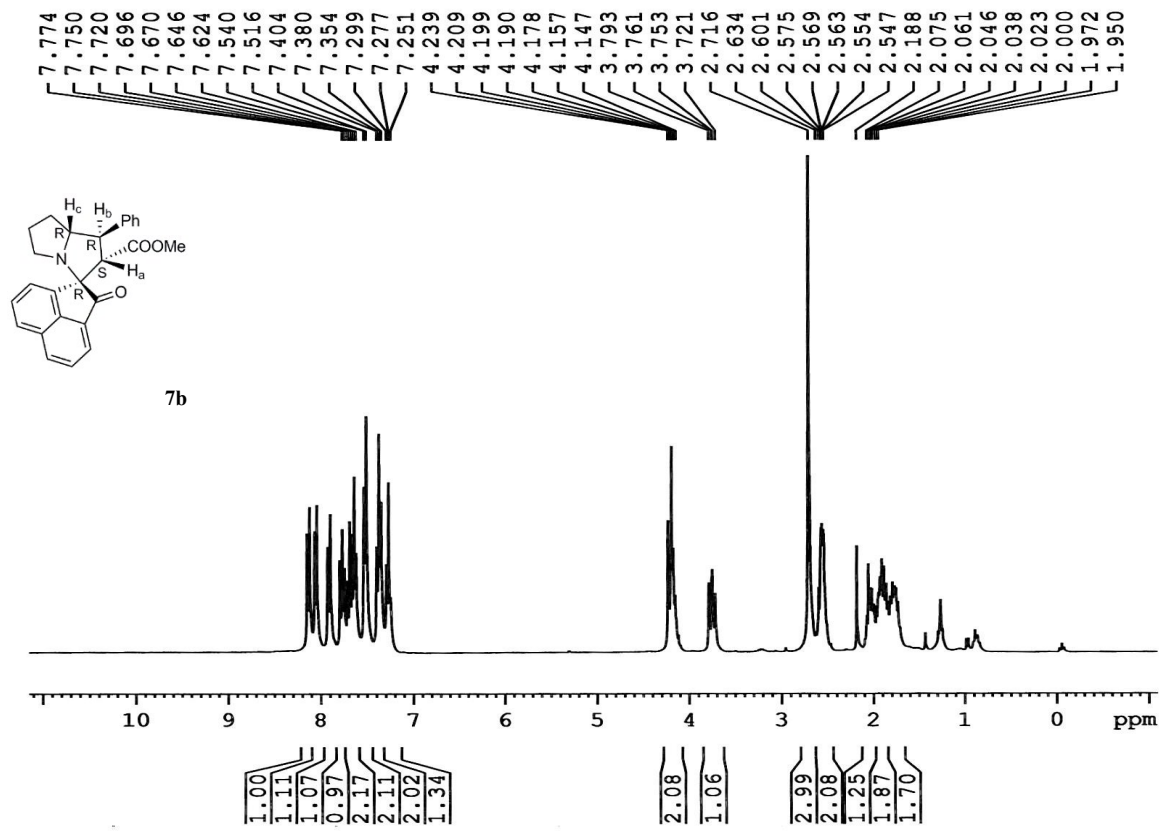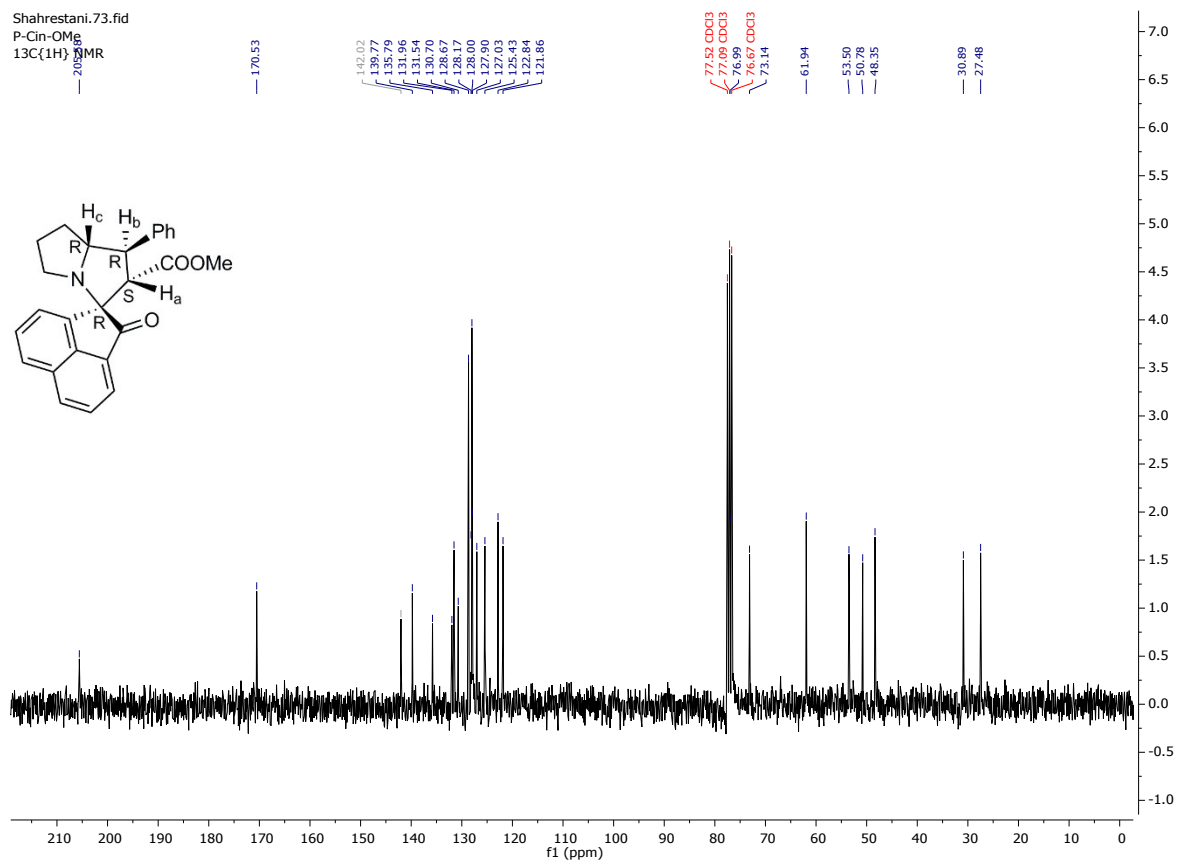

File : C:\MSDCHEM\3\DATA\30000315.D  
 Operator :  
 Acquired : 27 Nov 2014 8:26 using AcqMethod NORMAL  
 Instrument : Instrumen  
 Sample Name: B  
 Misc Info :  
 Vial Number: 1

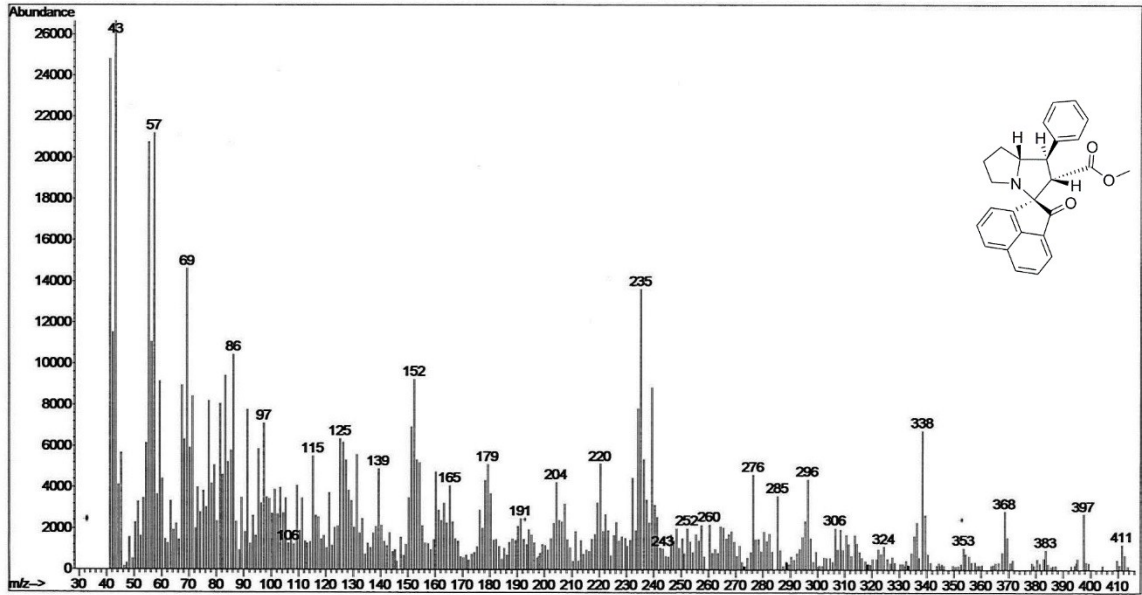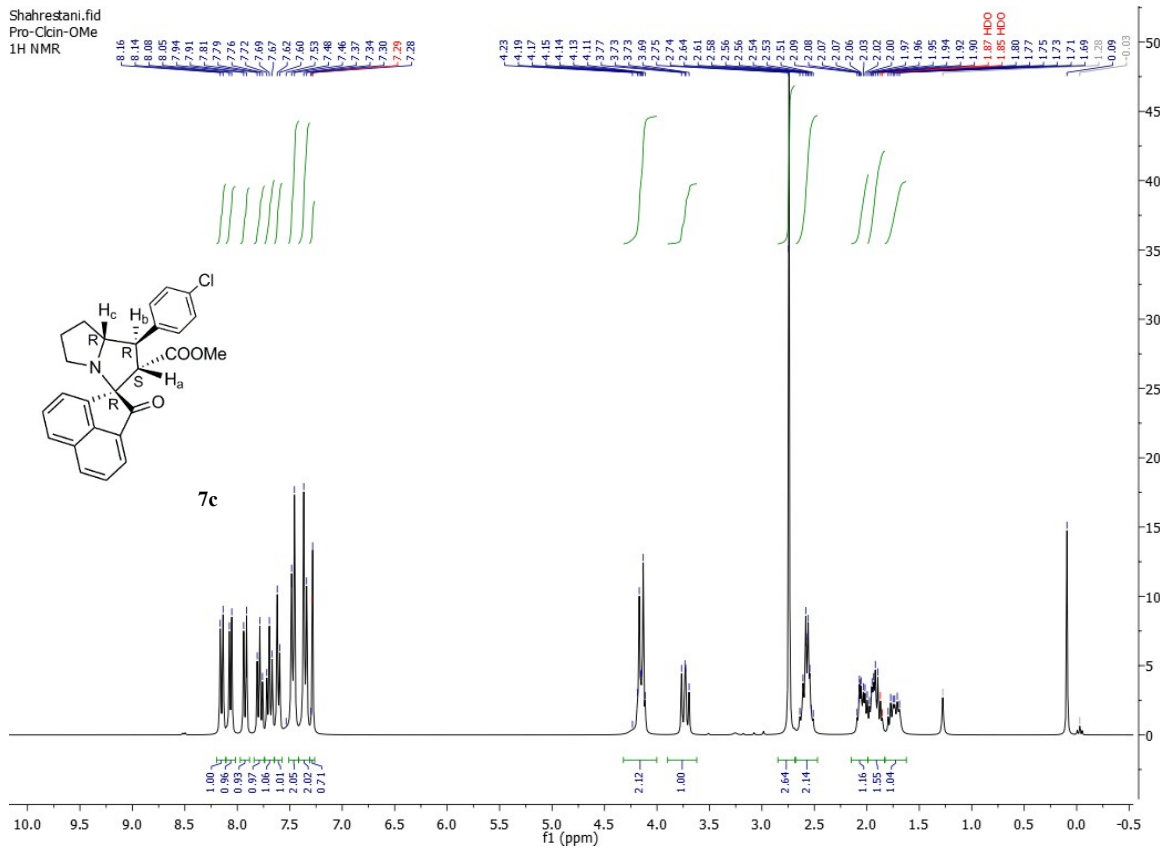

Shahrestani.95.fid  
P-ClCin-OM  
<sup>13</sup>C{<sup>1</sup>H} NMR

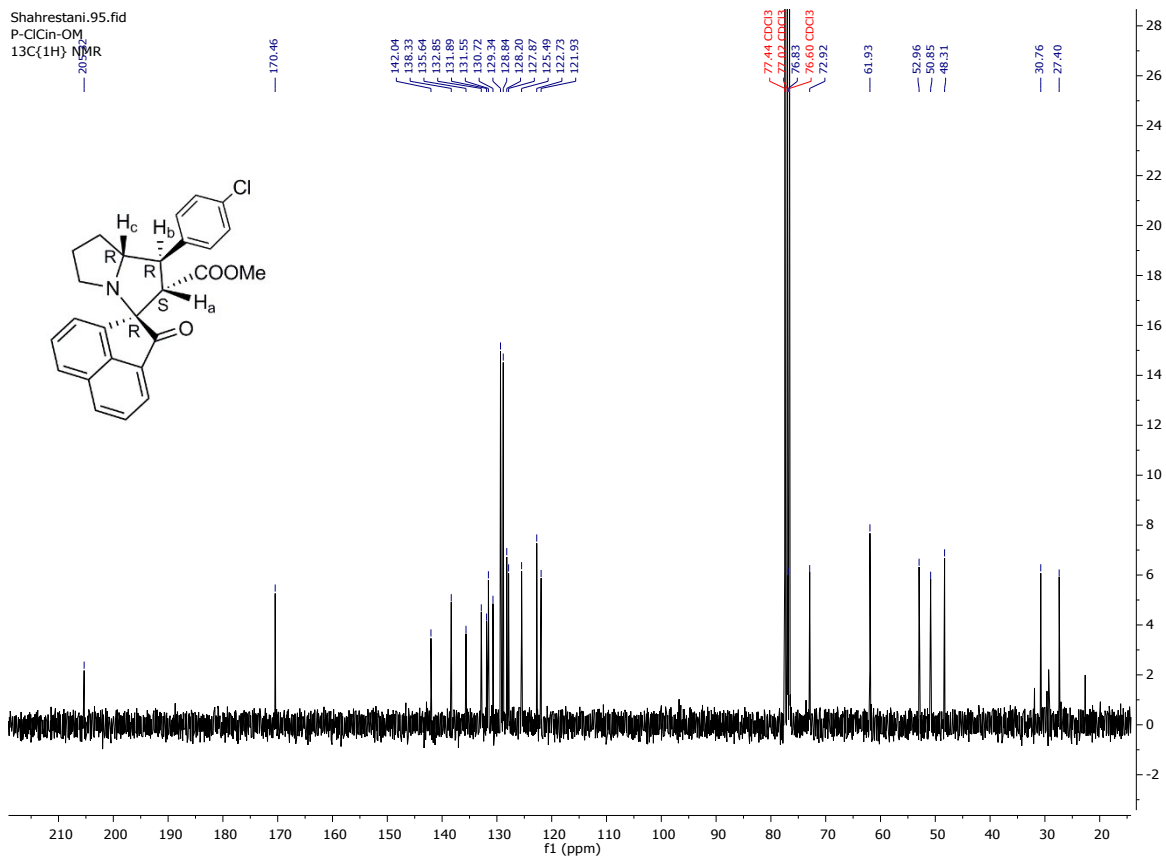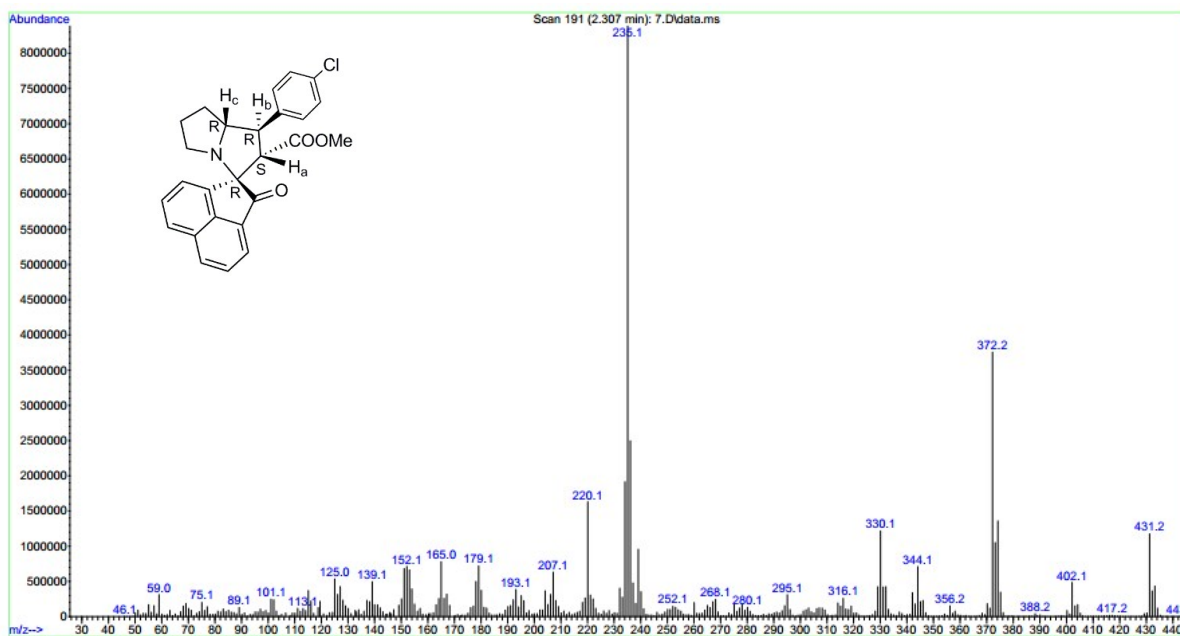



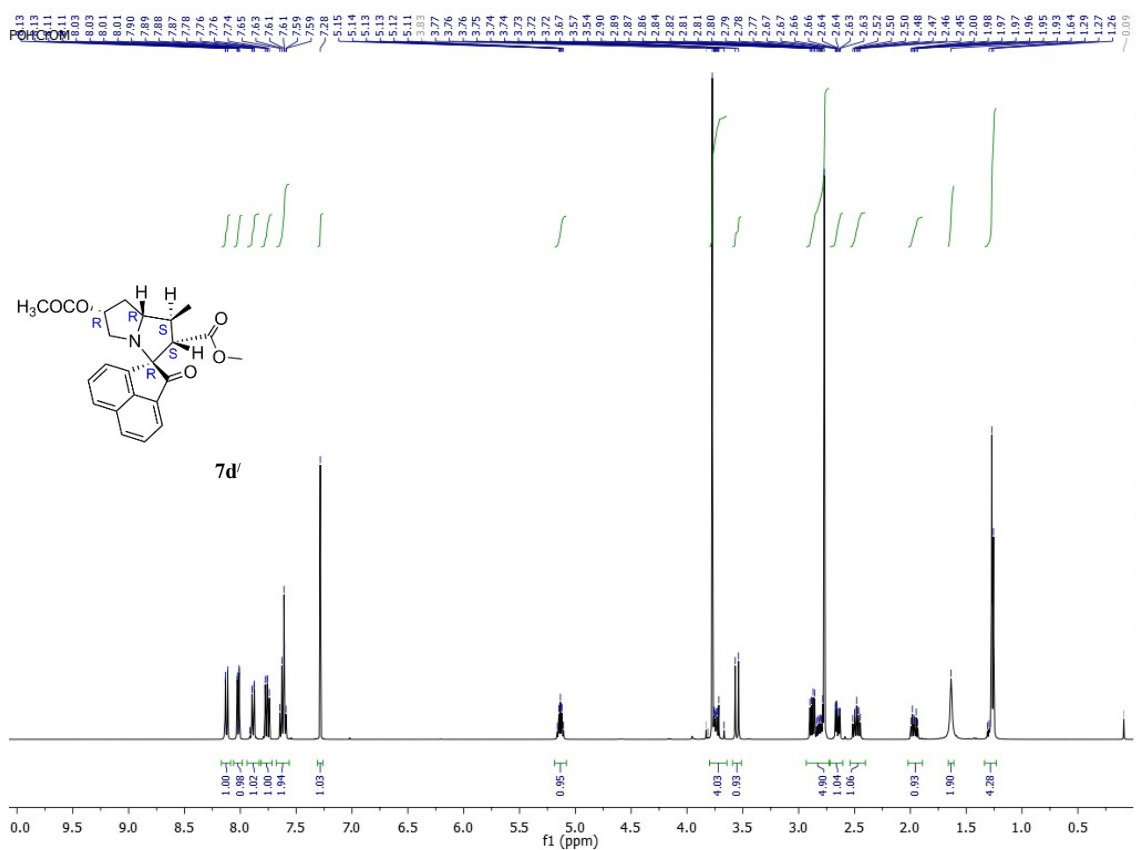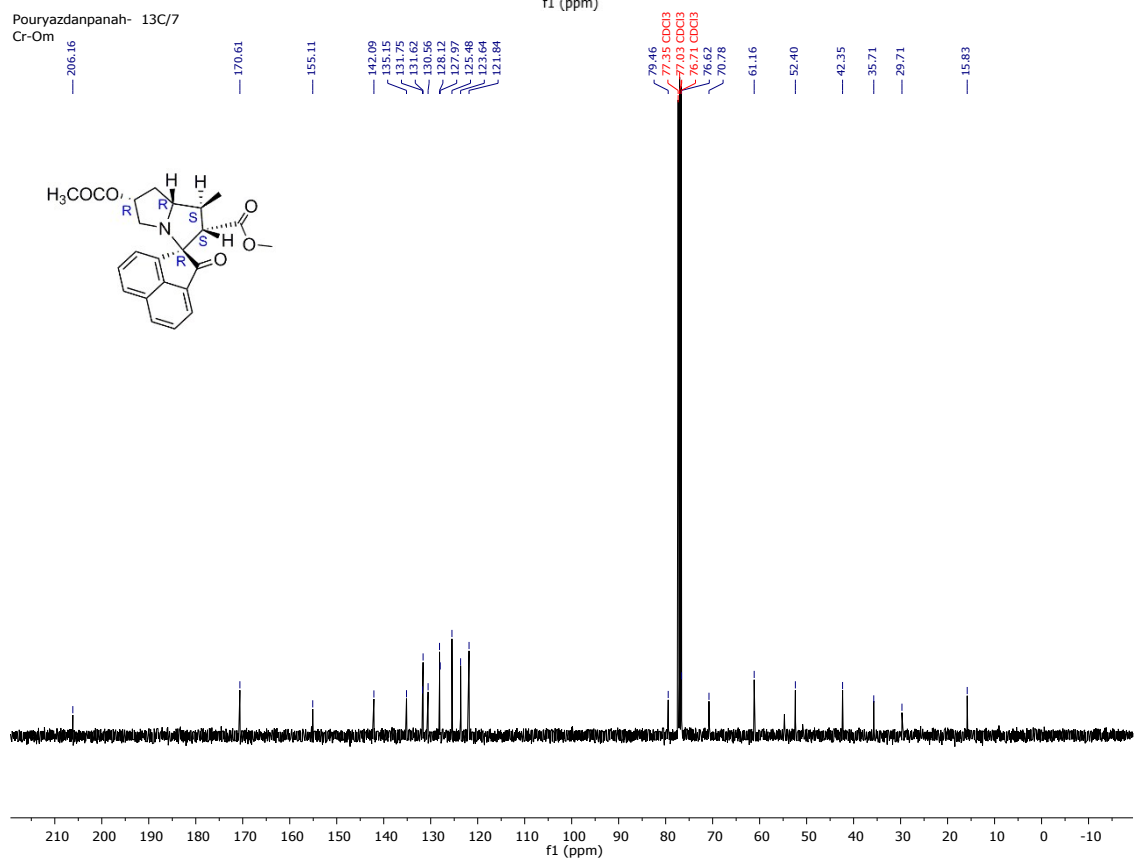



Shahrestani.fid  
POH-Down

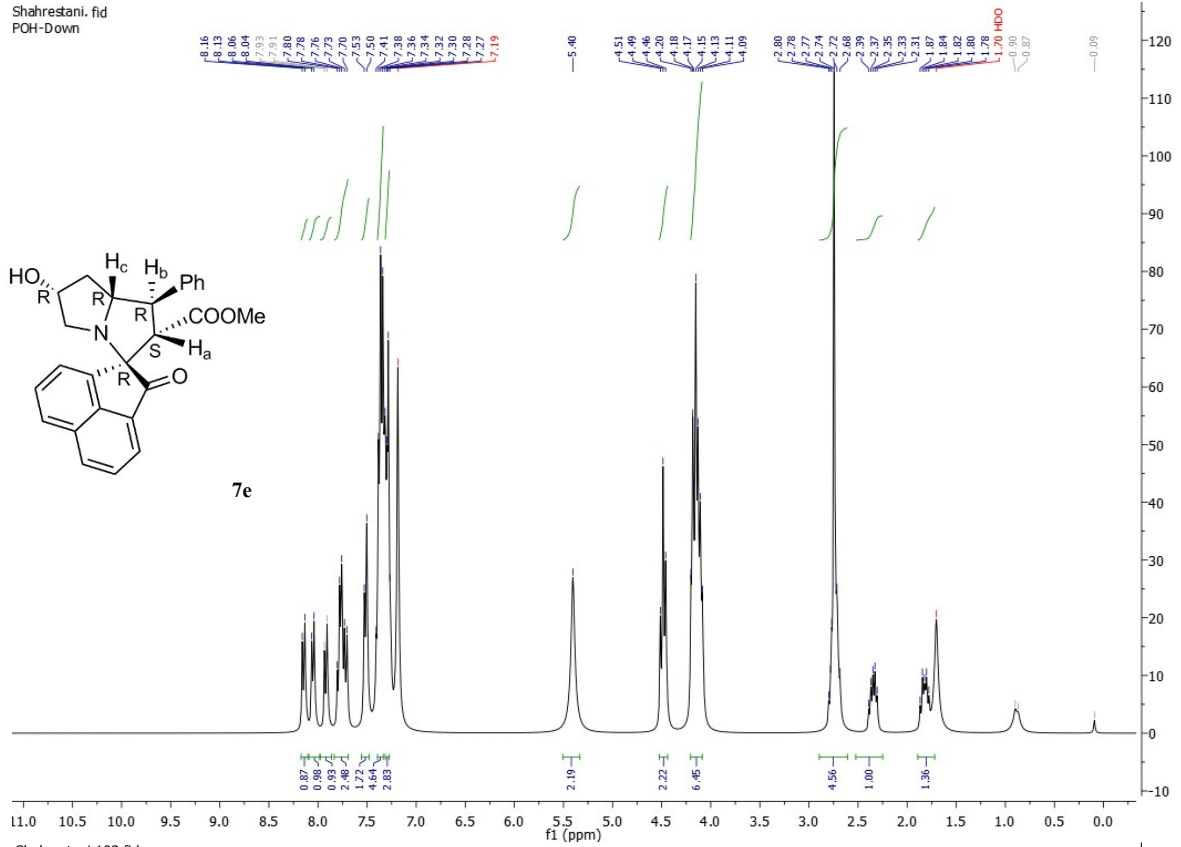

Shahrestani.103.fid  
UP  
1H NMR

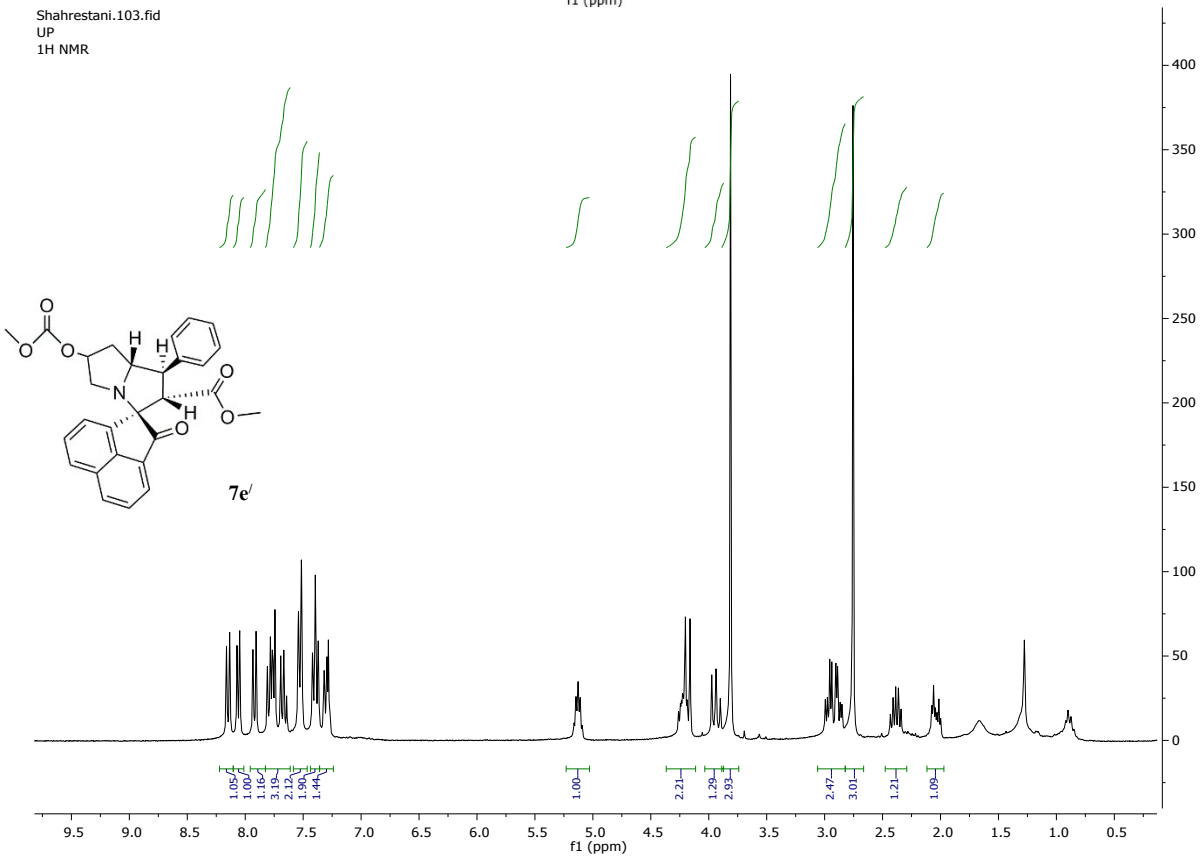

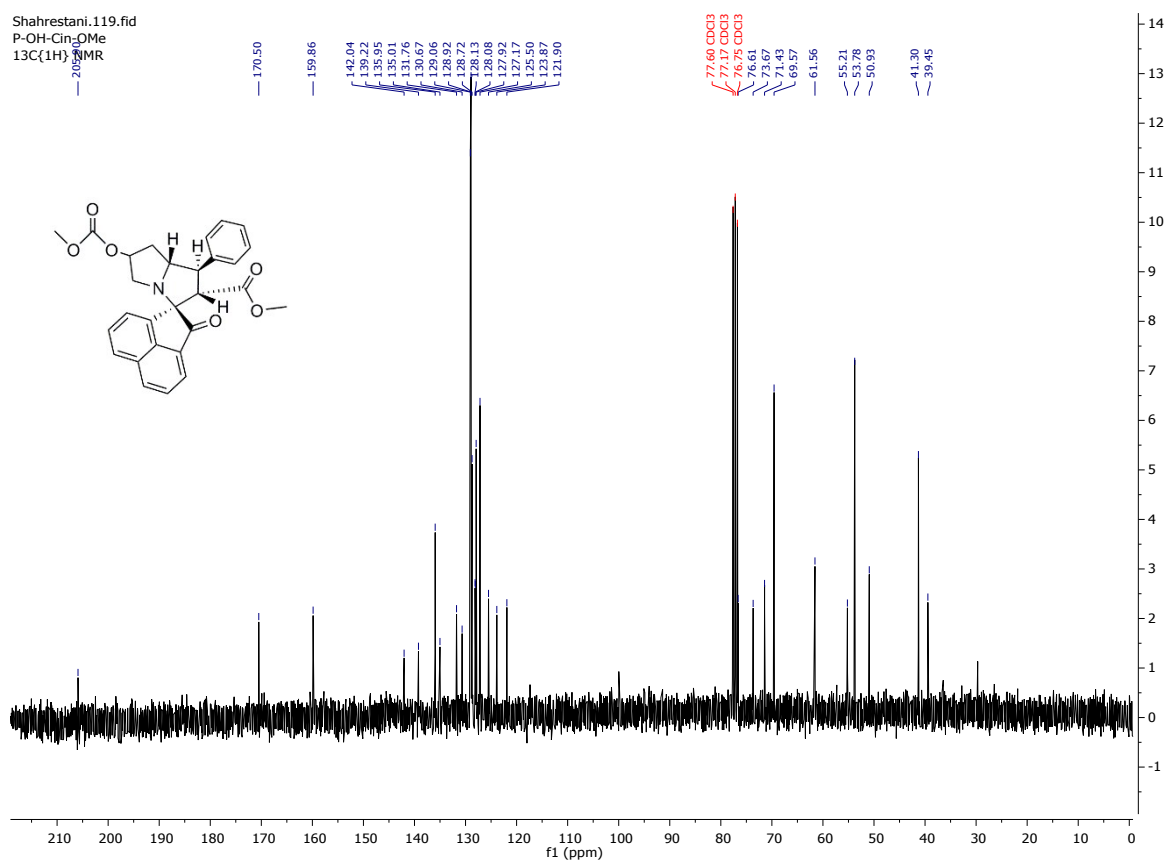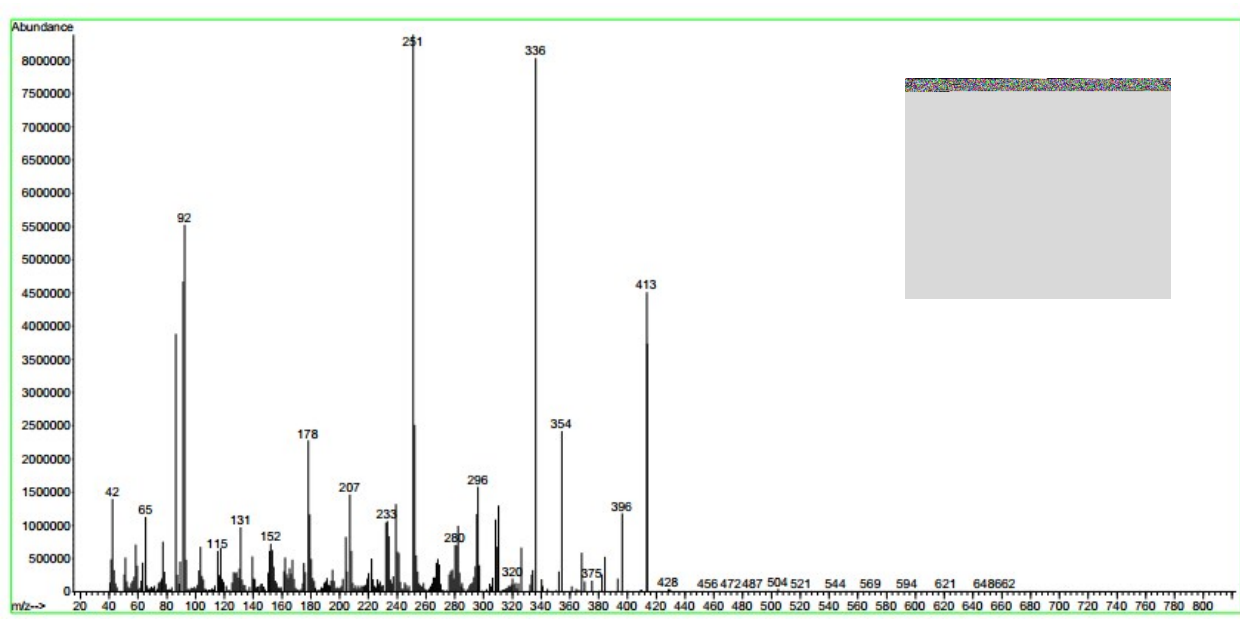

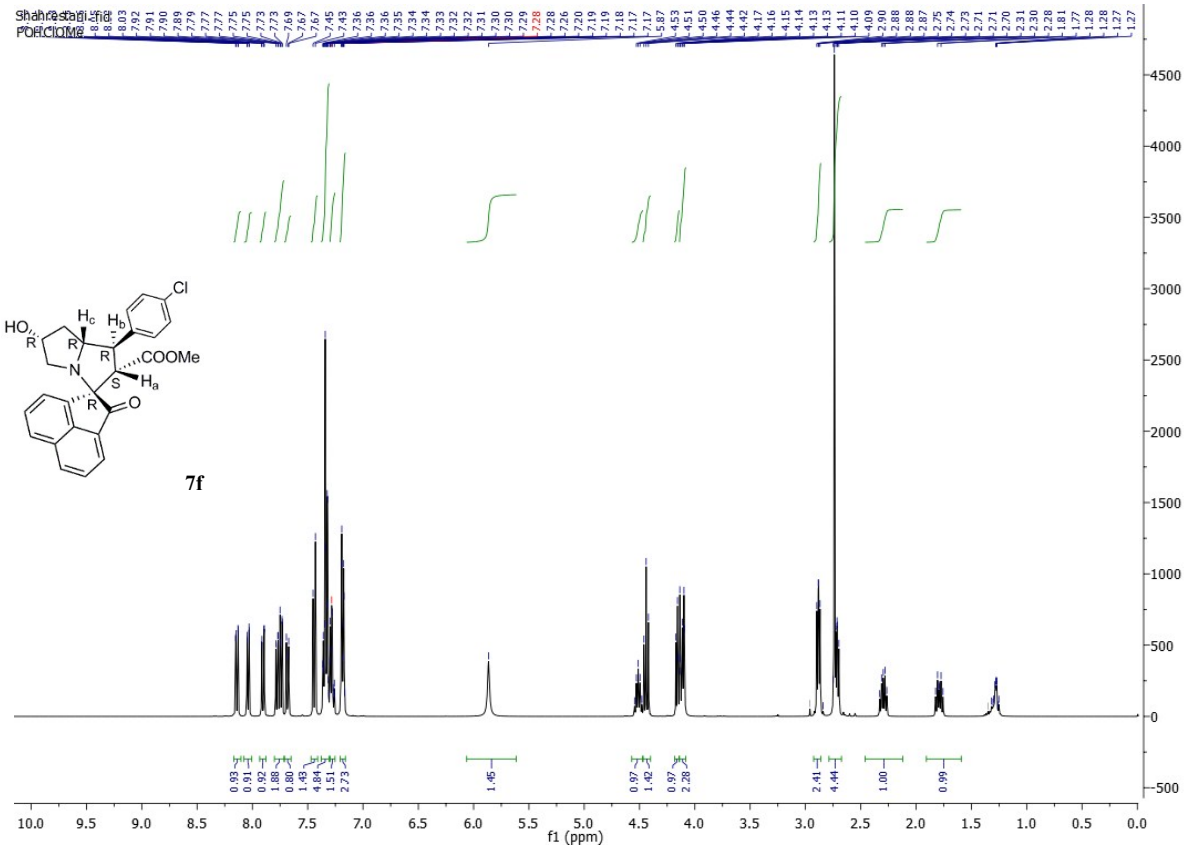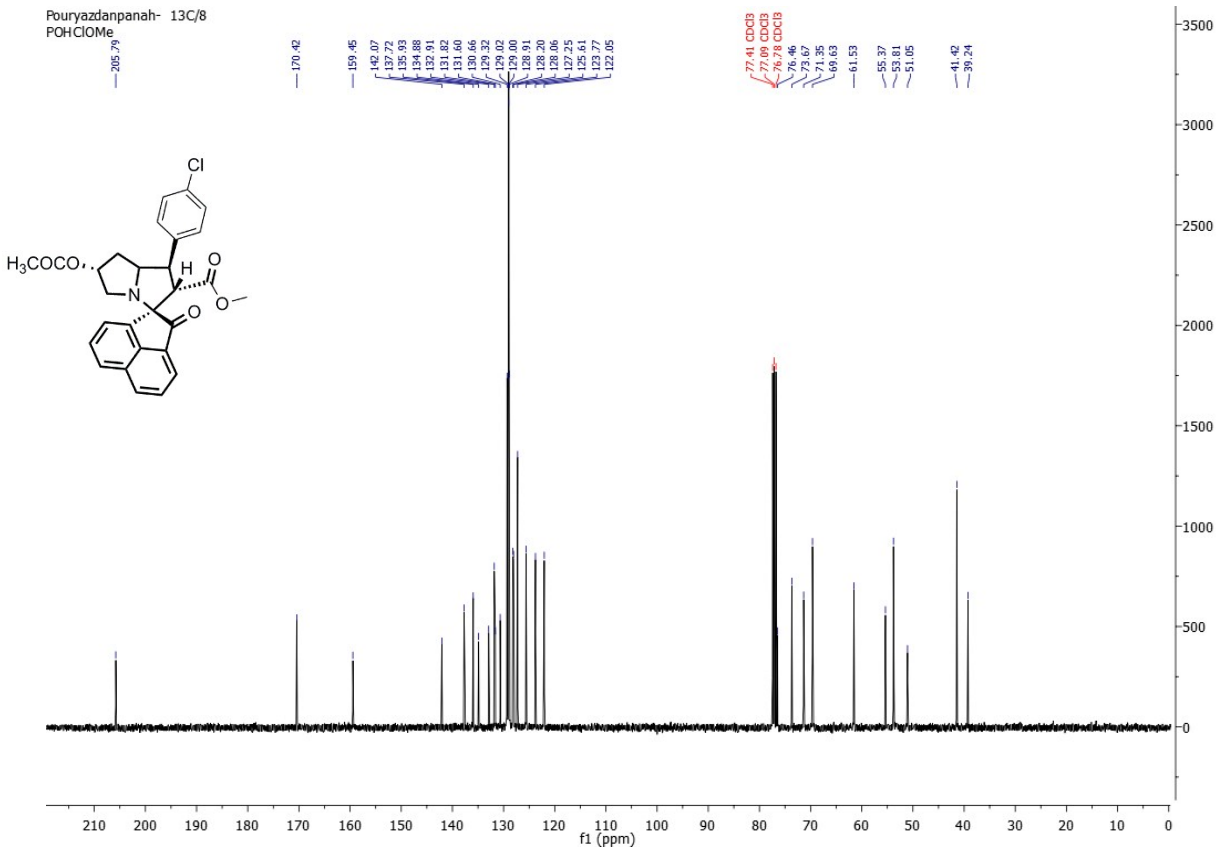

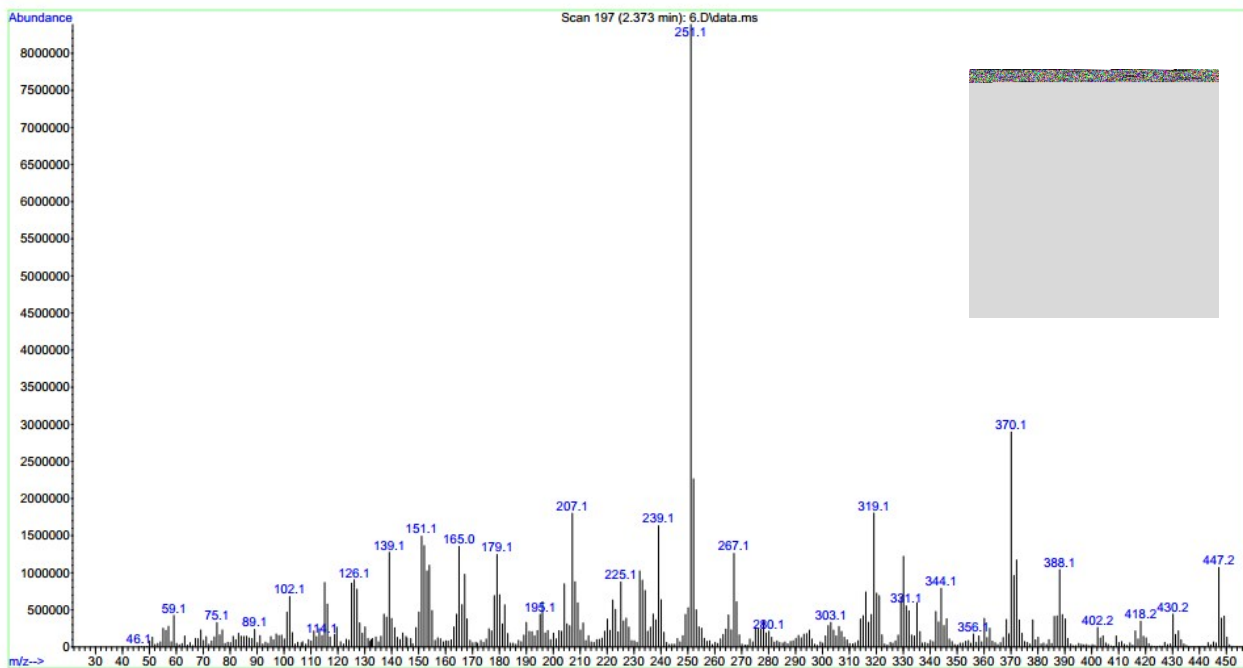

Sar-Crot-OMe  
1H NMR

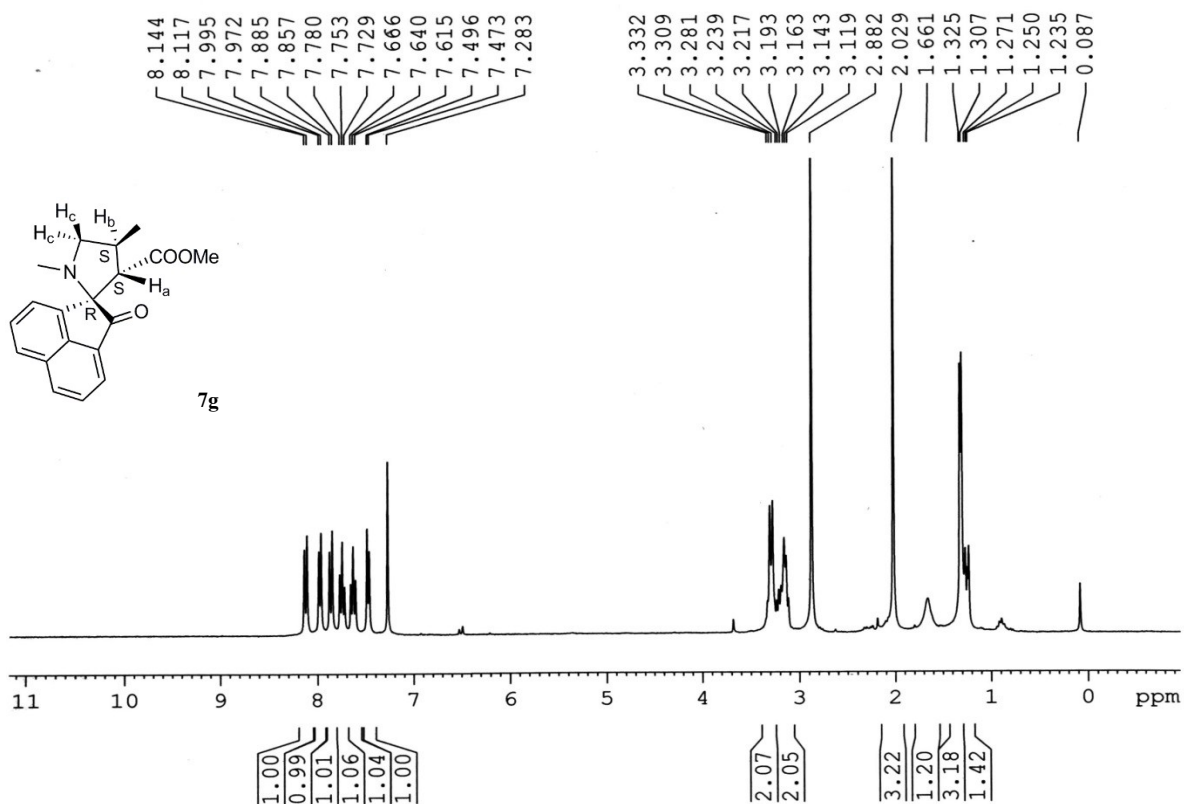

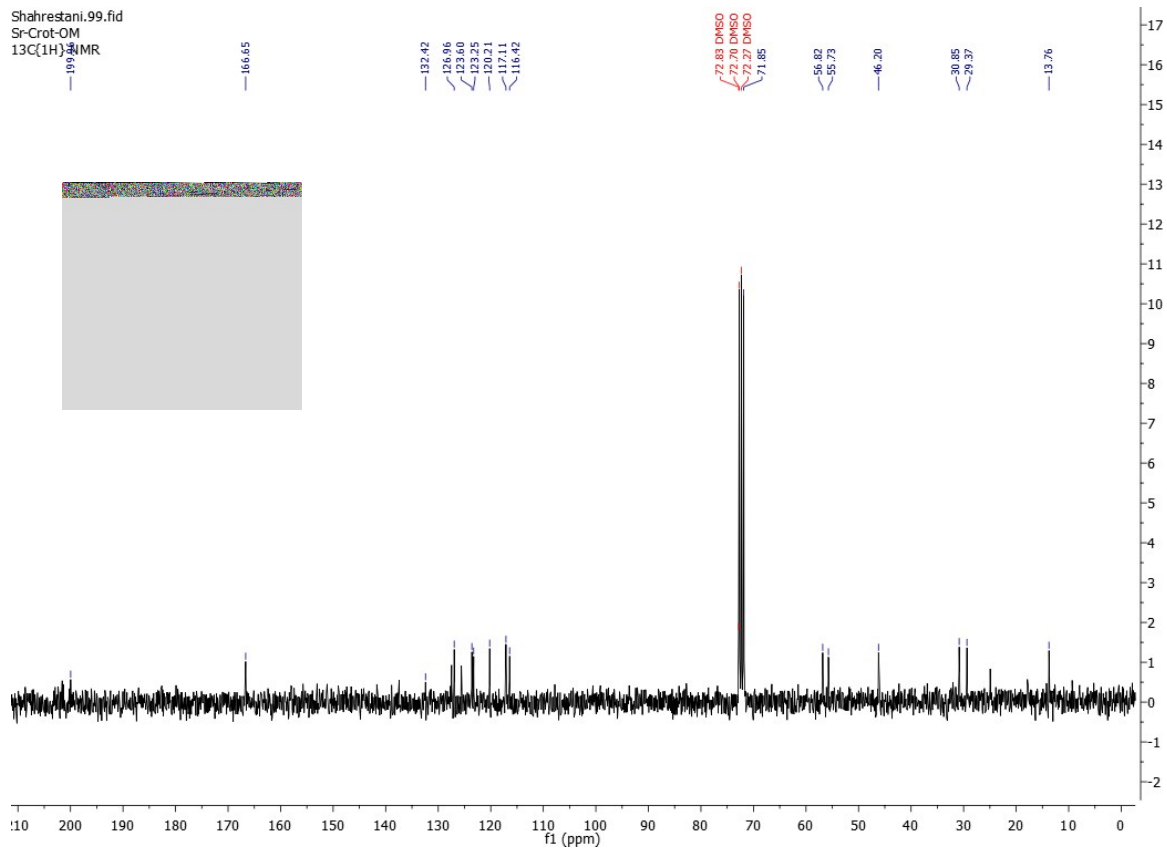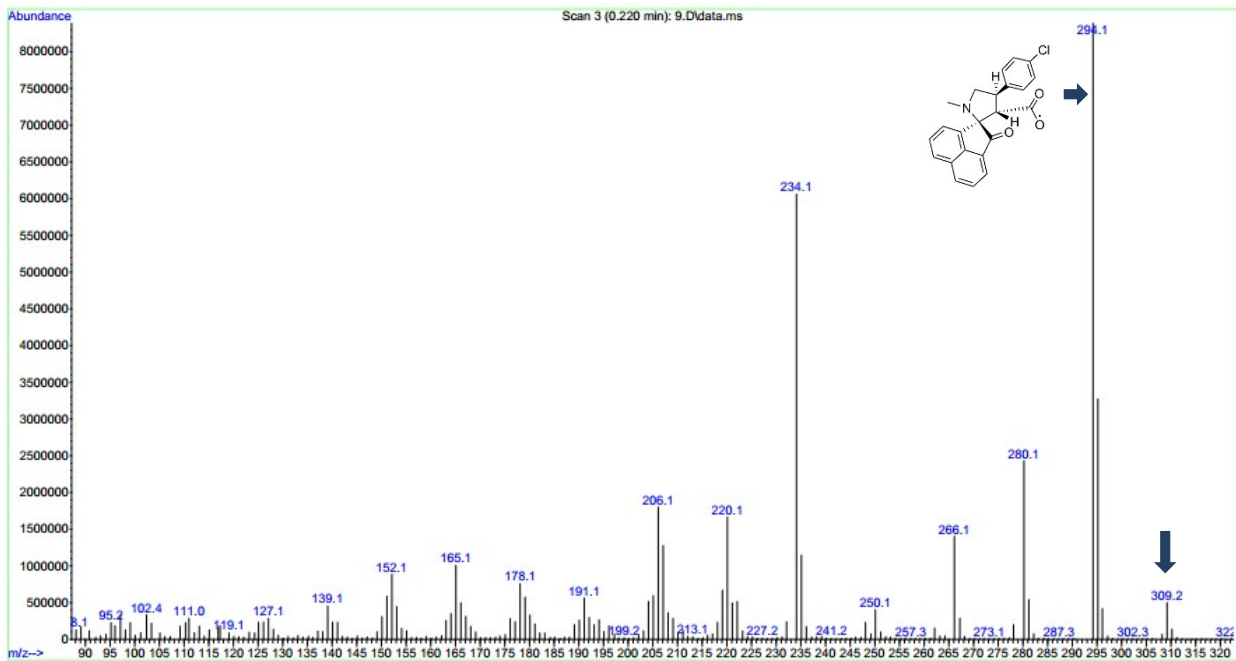

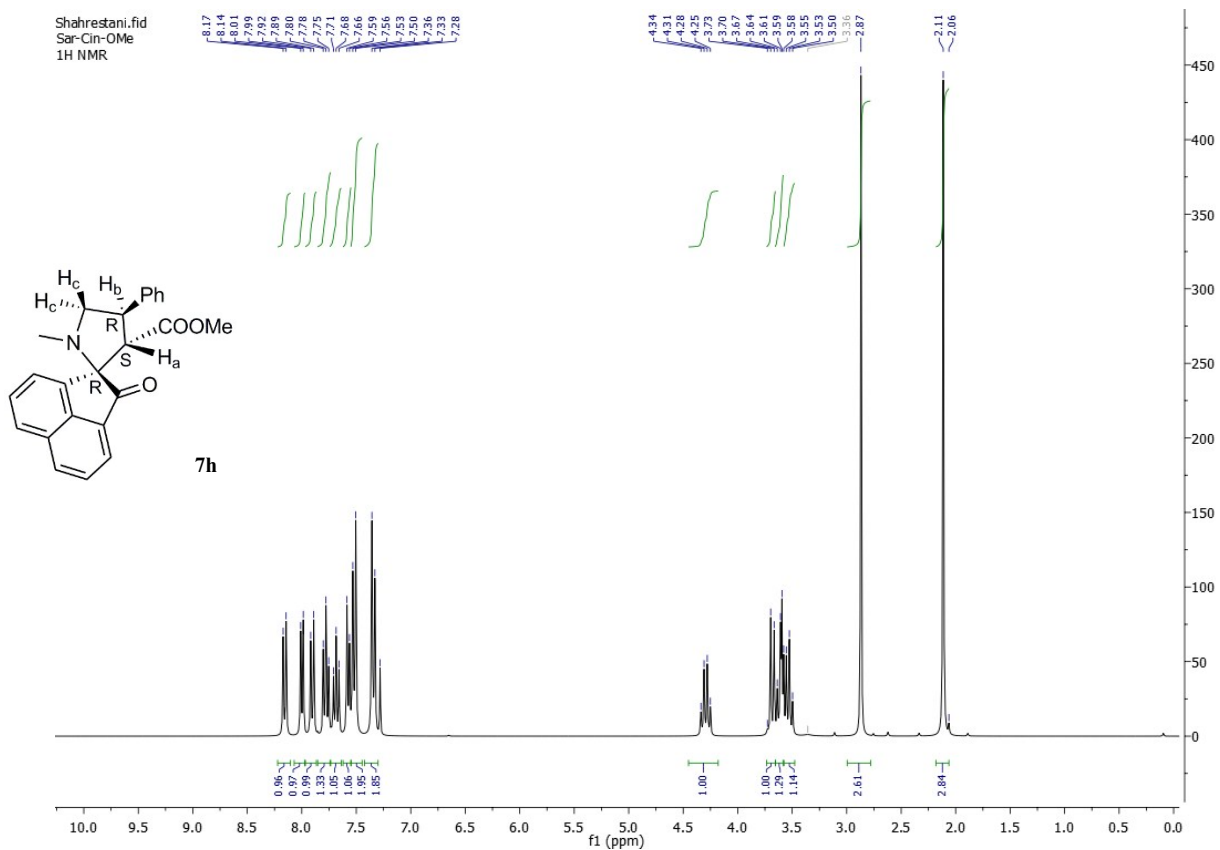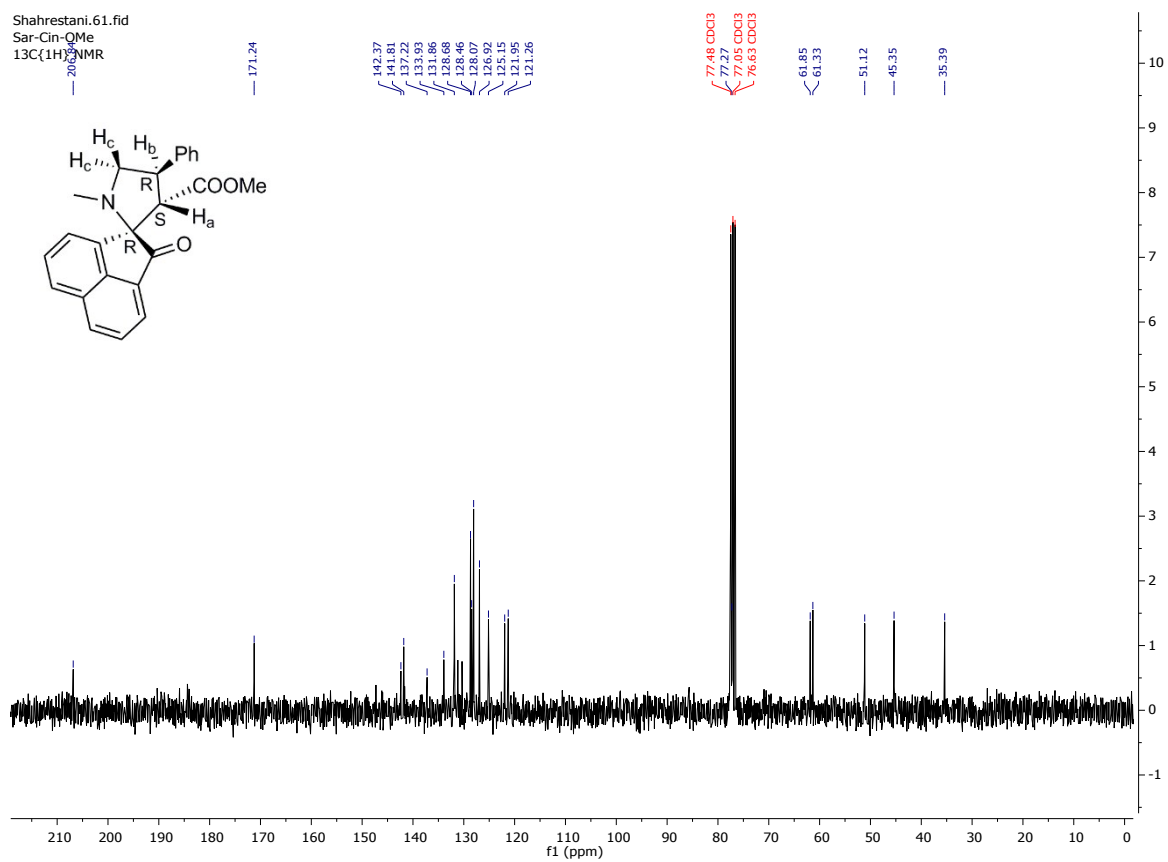

File : C:\MSDCHEM\3\DATA\30000316.D  
 Operator :  
 Acquired : 27 Nov 2014 8:29 using AcqMethod NORMAL  
 Instrument : Instrumen  
 Sample Name : C  
 Misc Info :  
 Vial Number : 1

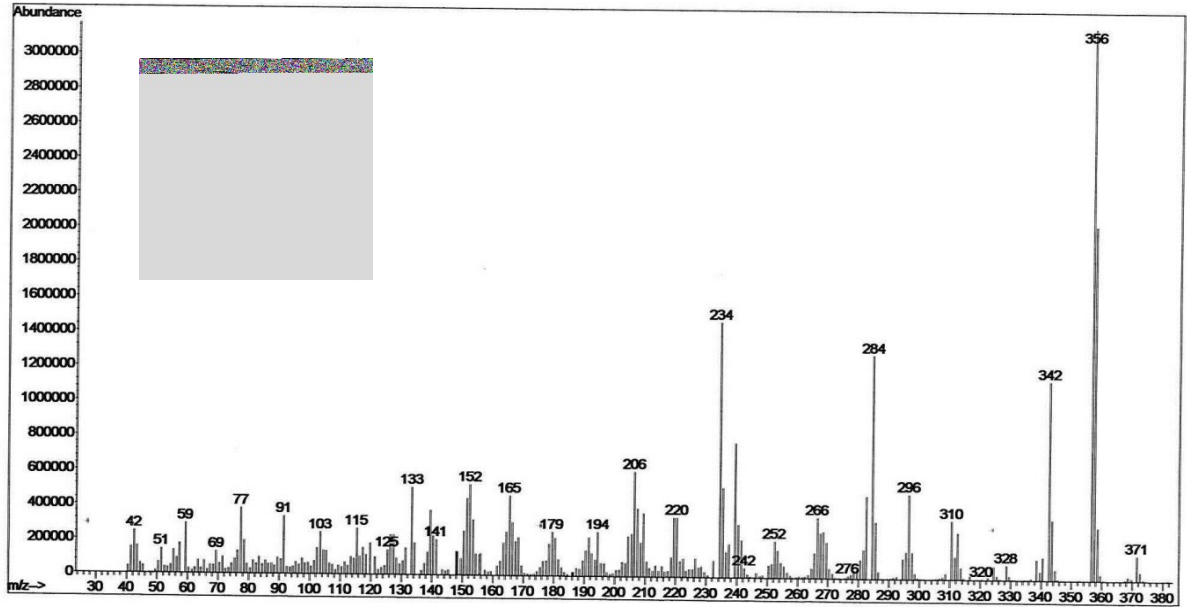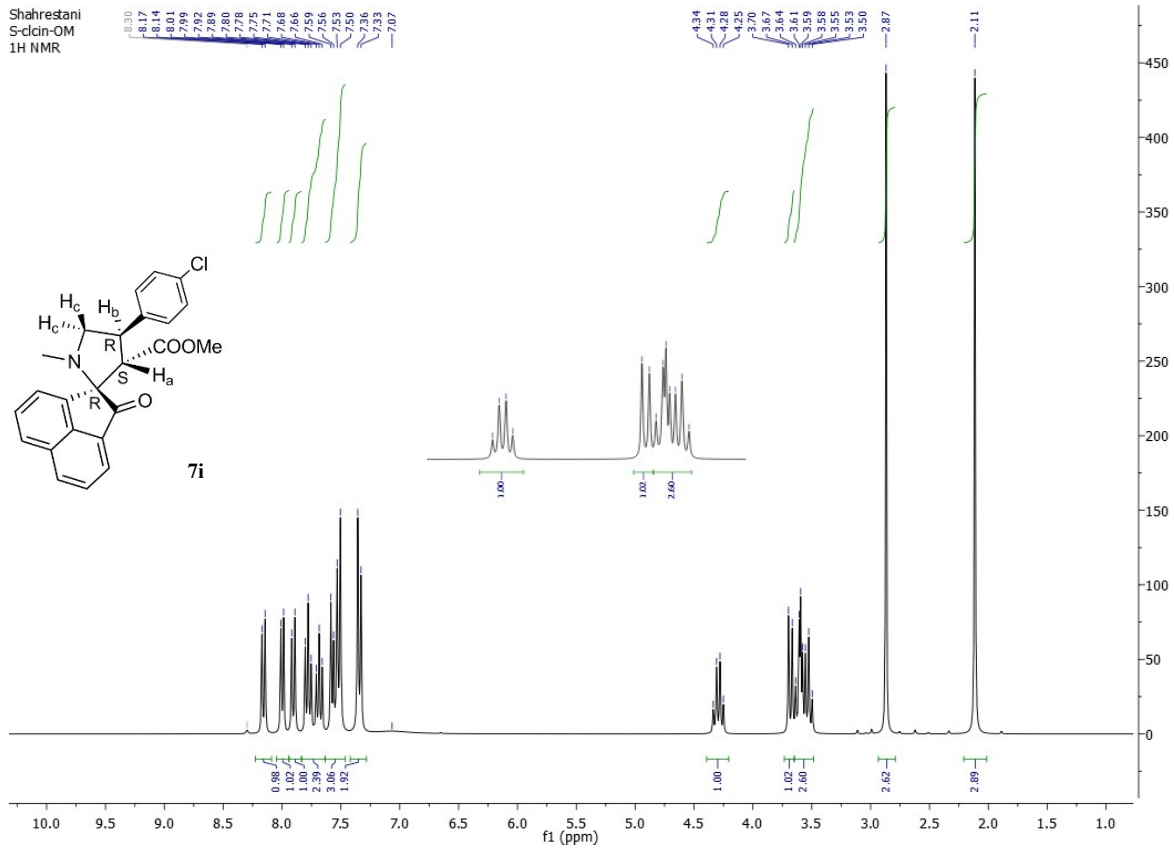

Desktop/94  
SCIOME  
13C(1H)

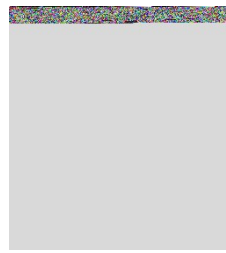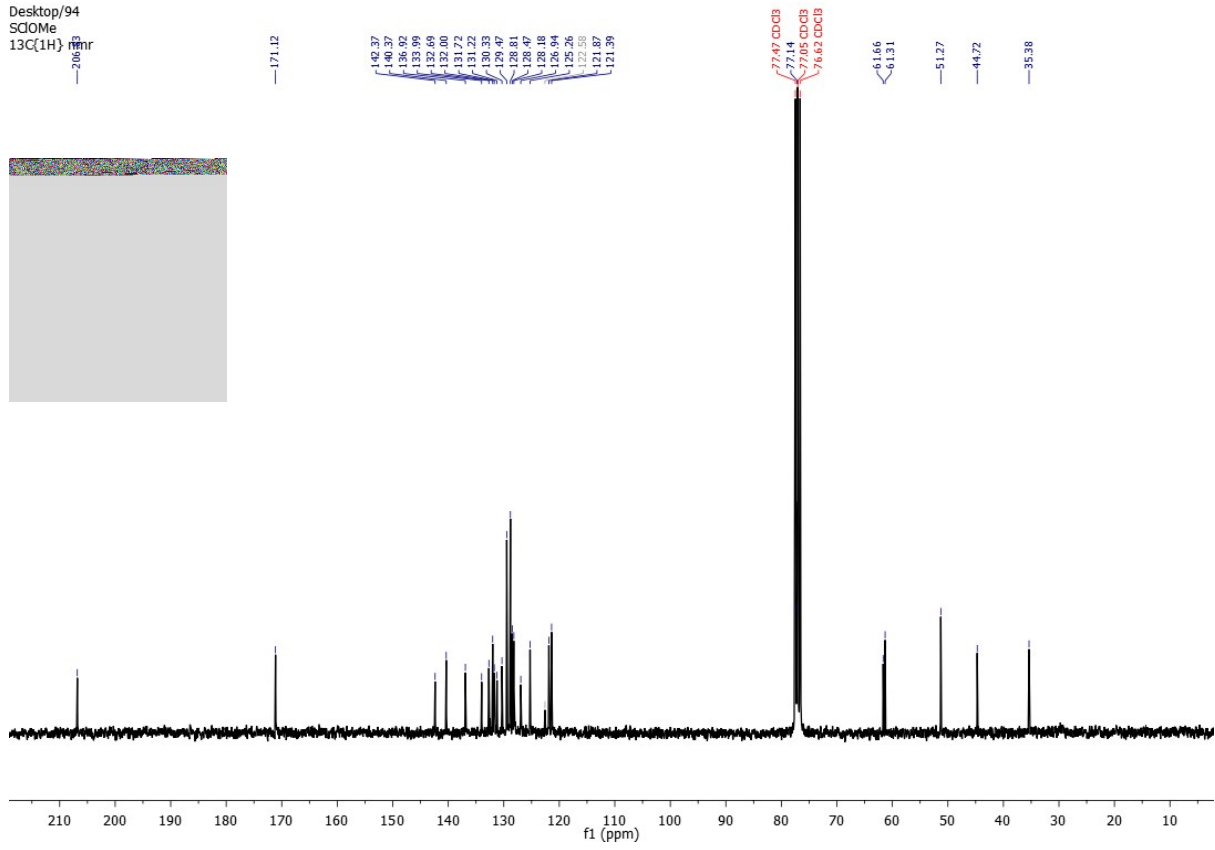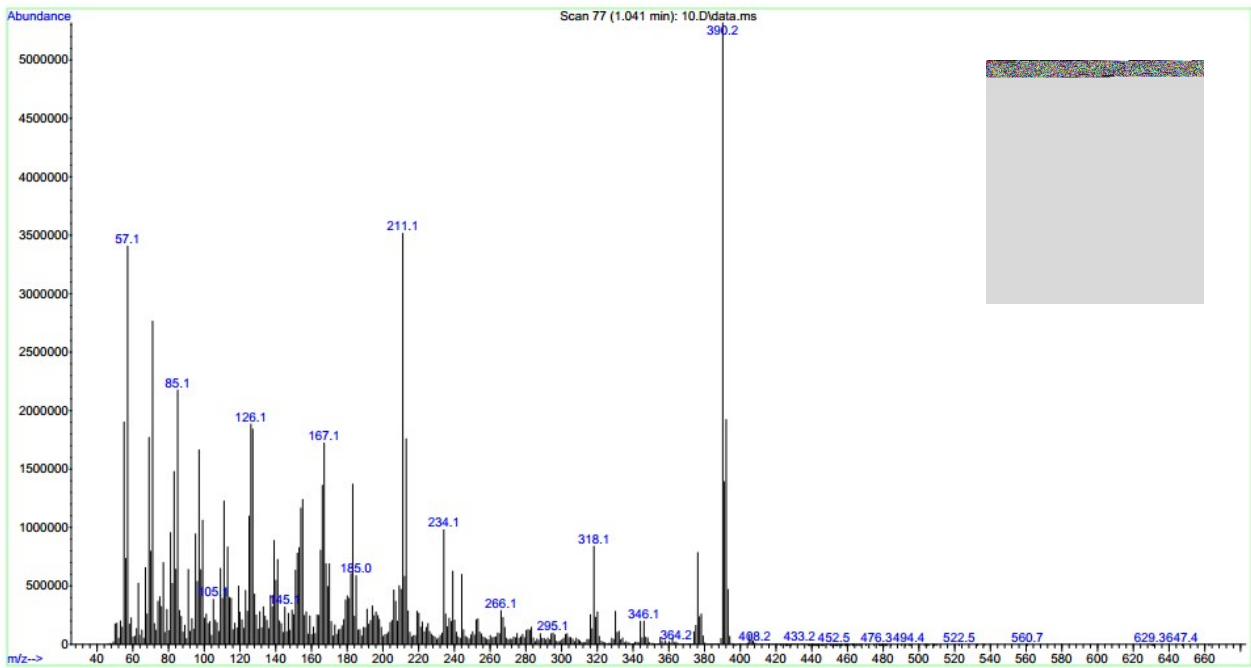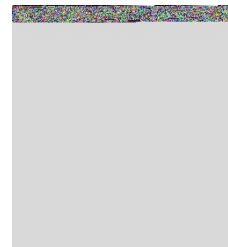



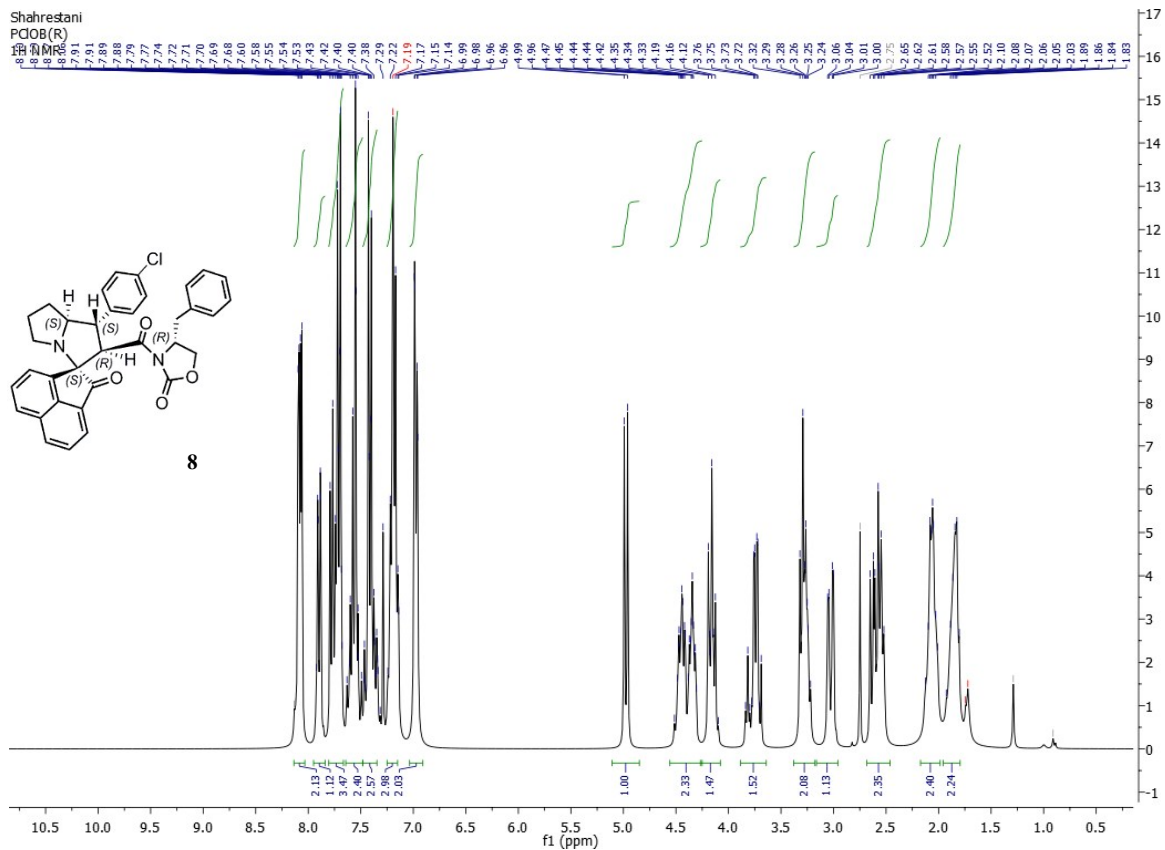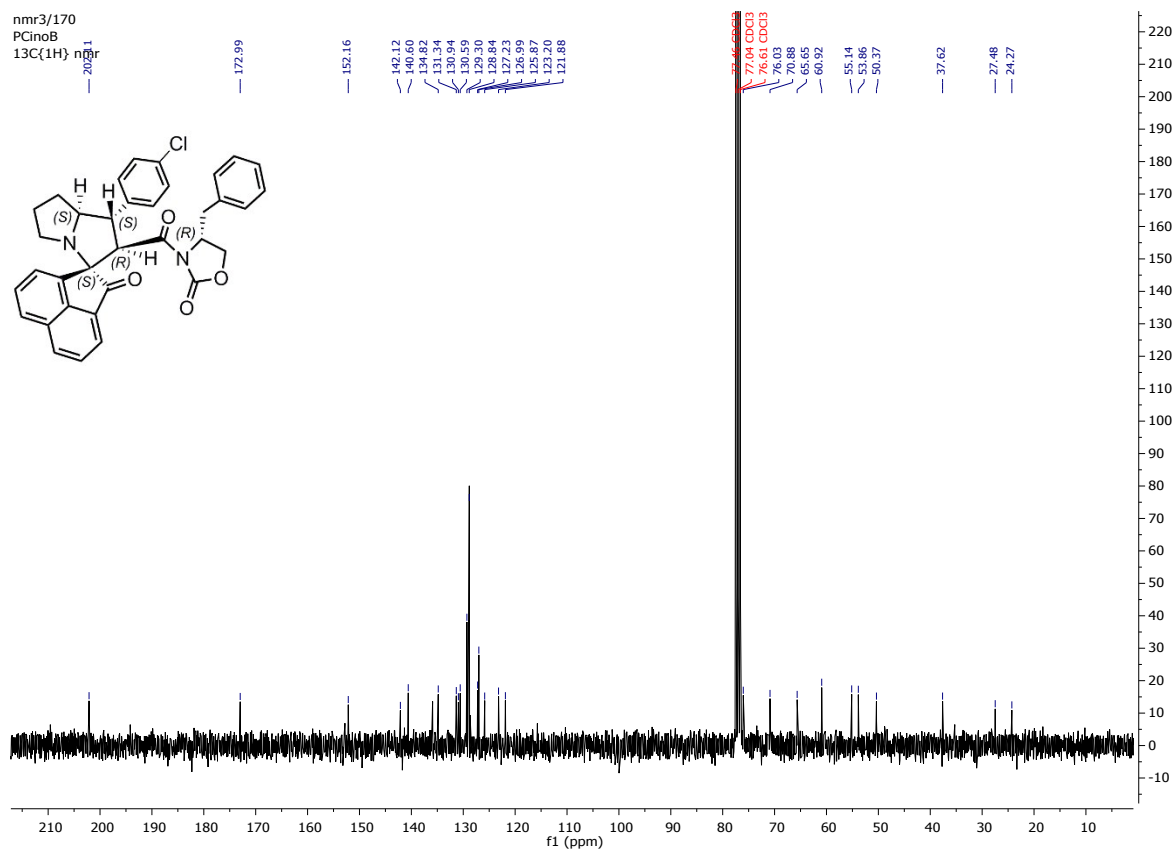

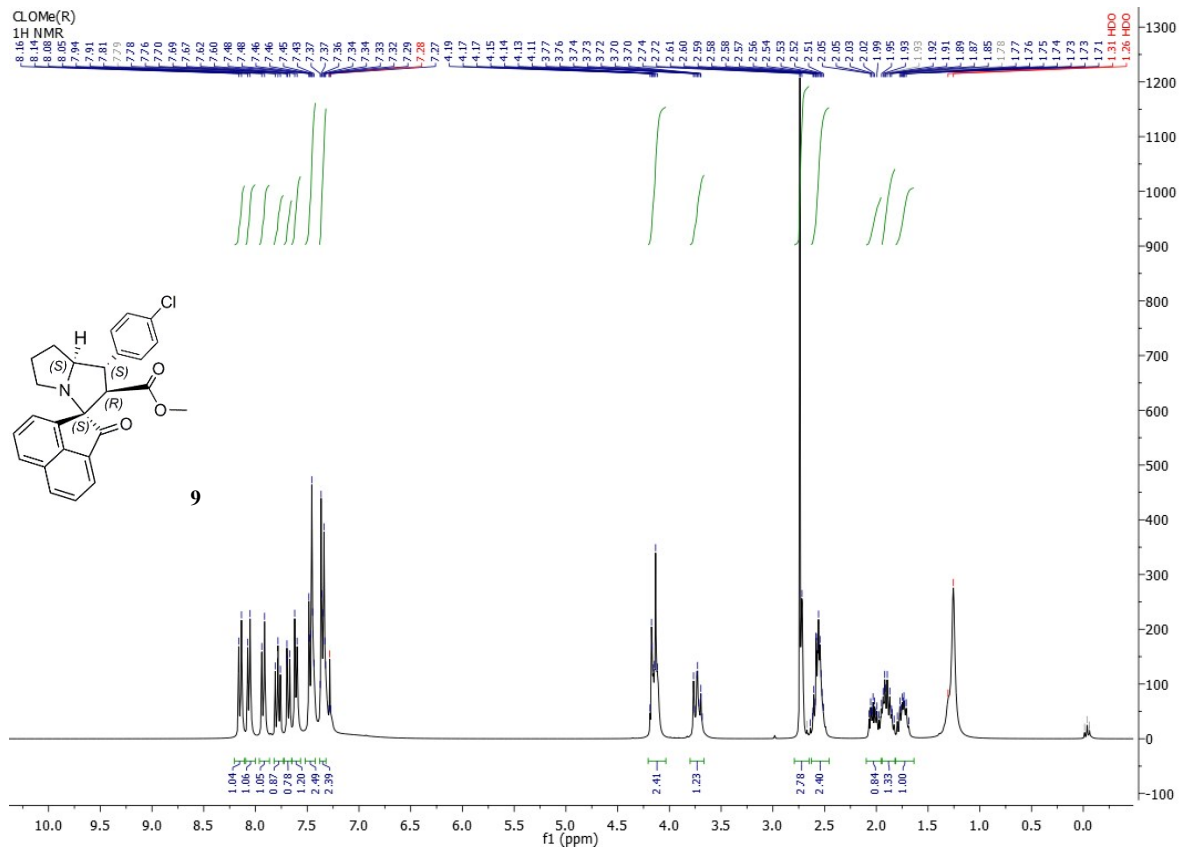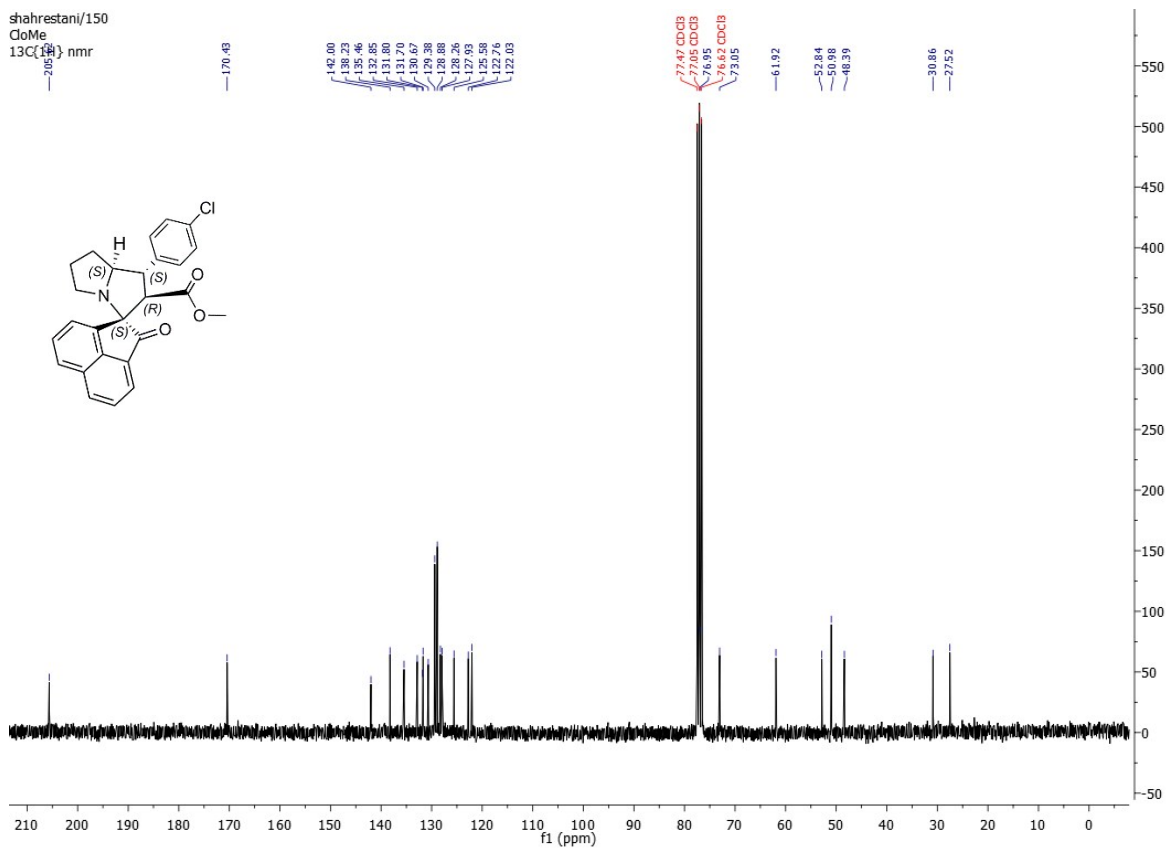

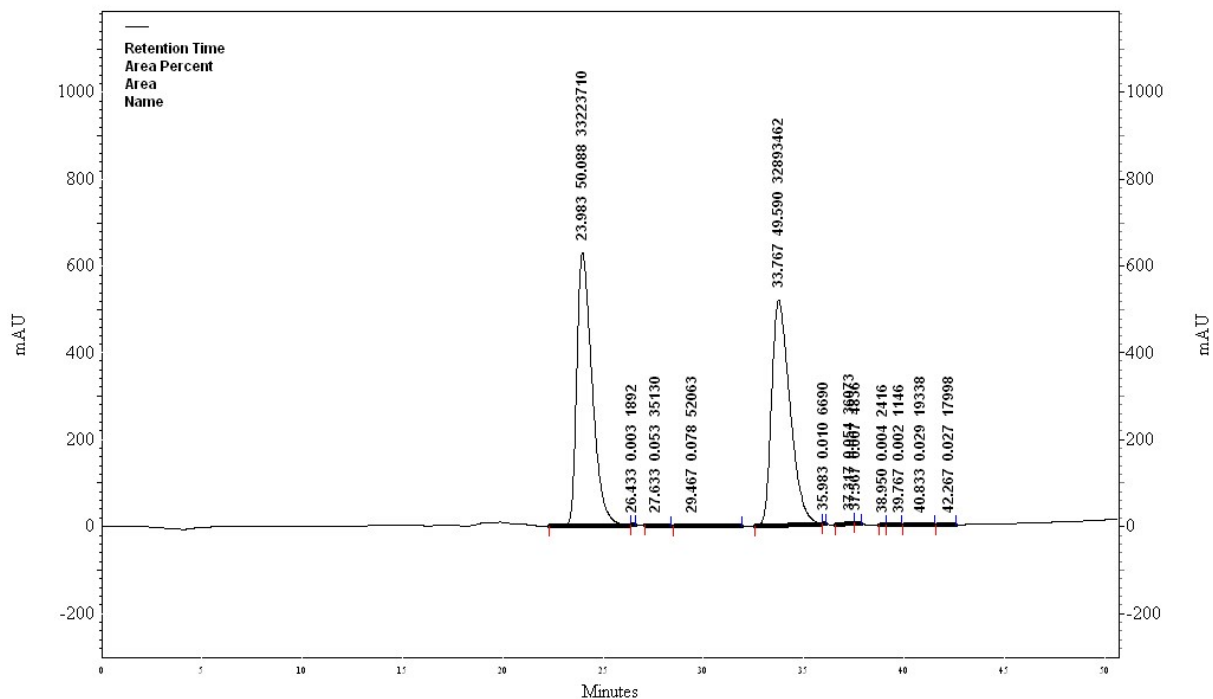

HPLC chromatogram of racemic product **7a**.

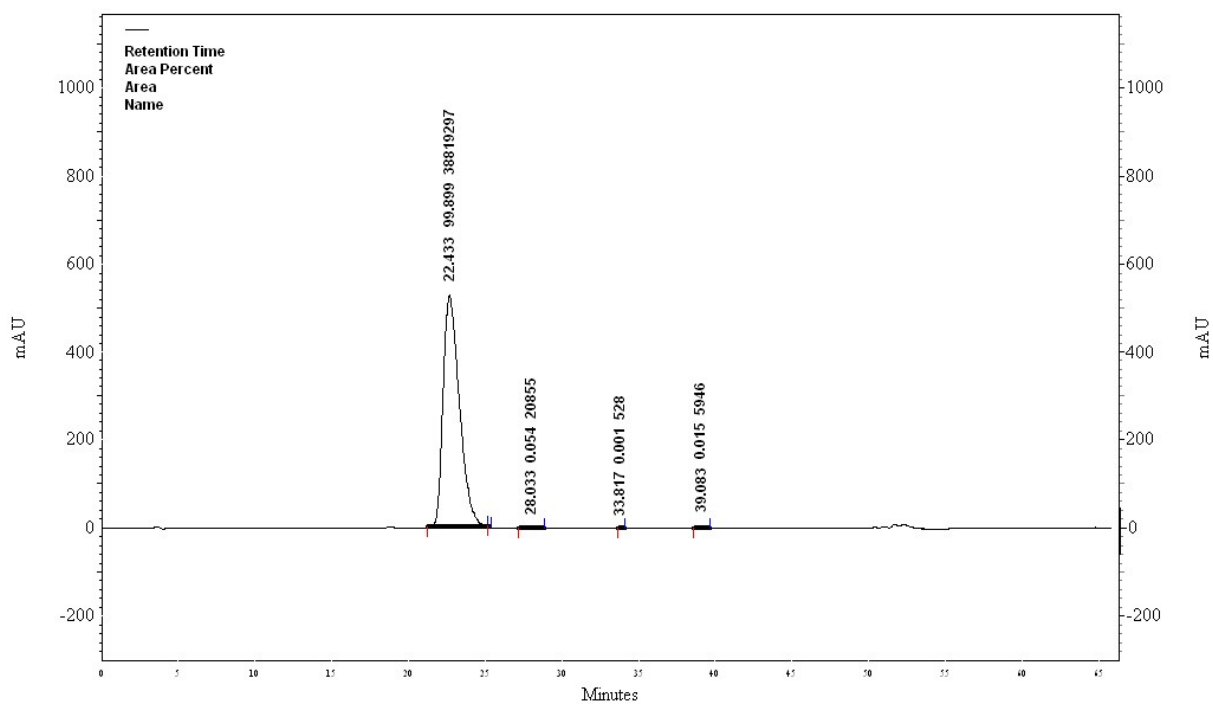

HPLC chromatogram of chiral product **7a**

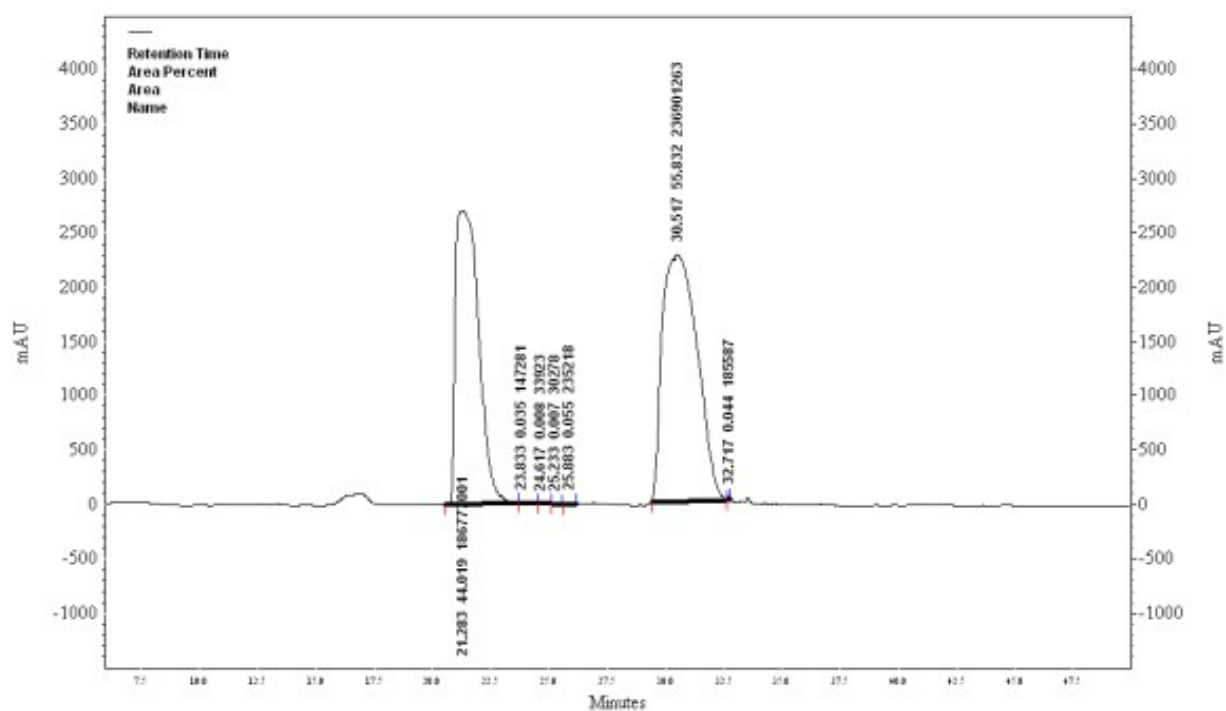

HPLC chromatogram of racemic product **9**

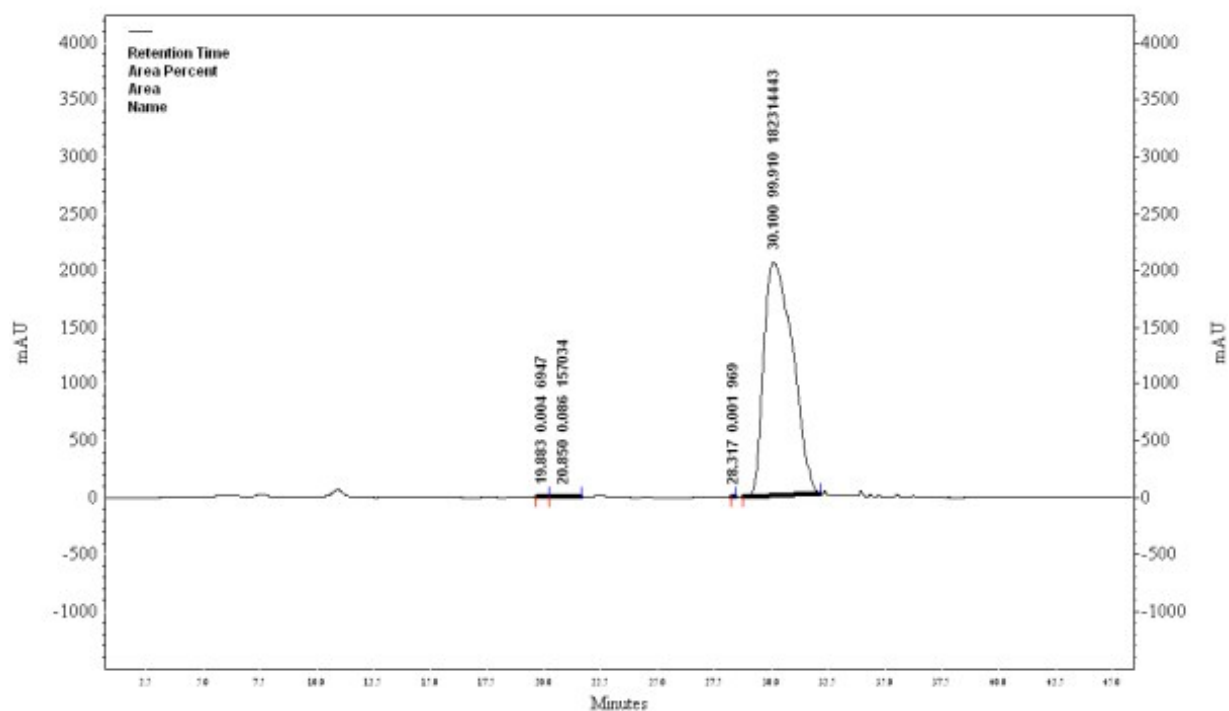

HPLC chromatogram of chiral product **9**

Z-Matrix data

## Dipolar 1

|   |             |             |             |
|---|-------------|-------------|-------------|
| C | -2.42648000 | -2.12521900 | 0.04676700  |
| C | -1.32939300 | -1.29246800 | 0.01369000  |
| C | -1.50704500 | 0.10317700  | 0.00249300  |
| C | -2.76831900 | 0.71935900  | 0.01532400  |
| C | -3.88916300 | -0.15630800 | 0.05325400  |
| C | -3.71548800 | -1.53201600 | 0.06906100  |
| H | -2.30899000 | -3.20469700 | 0.05409200  |
| C | -0.25351600 | 0.80052700  | -0.03649600 |
| C | -2.78764200 | 2.14573600  | -0.01513800 |
| H | -4.89269400 | 0.26152200  | 0.06797800  |
| H | -4.59059800 | -2.17515500 | 0.09674900  |
| C | -1.59194500 | 2.83186900  | -0.06426100 |
| C | -0.32115300 | 2.18626300  | -0.07972300 |
| H | -3.73283000 | 2.68075800  | -0.00475400 |
| H | -1.60721600 | 3.91815700  | -0.09496200 |
| H | 0.56210200  | 2.81238800  | -0.13538600 |
| C | 0.14512700  | -1.55461600 | -0.02340400 |
| C | 0.76877600  | -0.23846800 | -0.04043500 |
| O | 0.70287000  | -2.66288100 | -0.03130600 |
| N | 2.13665100  | -0.09893300 | -0.03975100 |
| C | 2.77346300  | 1.24883700  | 0.00006000  |
| C | 4.24789000  | 0.95854000  | 0.31274200  |
| C | 3.05081800  | -1.05363000 | -0.09334100 |
| H | 2.27632300  | 1.85115900  | 0.76033000  |
| C | 4.44286900  | -0.51505500 | -0.11201100 |
| H | 4.42682800  | 1.06466000  | 1.38626000  |
| H | 4.91714200  | 1.64719000  | -0.20716200 |
| H | 2.62154100  | 1.72168000  | -0.97517800 |
| H | 2.72051000  | -2.08145900 | -0.15293400 |
| H | 5.11229600  | -1.06305900 | 0.56037200  |
| H | 4.88327900  | -0.59672300 | -1.11819600 |

## Dipolarophile 2

|   |             |             |             |
|---|-------------|-------------|-------------|
| C | 5.72414400  | -1.52780200 | 0.37059200  |
| H | 5.97029500  | -2.13831500 | 1.24859700  |
| H | 6.09728200  | -0.51403700 | 0.53686100  |
| H | 6.27255400  | -1.96729400 | -0.47226000 |
| C | 4.25292400  | -1.55021700 | 0.11028700  |
| H | 3.78937000  | -2.51972800 | -0.06633100 |
| C | 3.46318100  | -0.46692200 | 0.07878400  |
| H | 3.84409000  | 0.53181000  | 0.25071900  |
| C | 2.01891800  | -0.63301400 | -0.18956600 |
| O | 1.47771500  | -1.71637300 | -0.38217000 |
| N | 1.21333000  | 0.52274900  | -0.24382400 |
| C | 1.56379900  | 1.86681100  | -0.03836400 |
| O | 0.47772100  | 2.63482600  | -0.31859100 |
| C | -0.22791300 | 0.39206000  | -0.50085700 |
| H | -0.38417400 | -0.32086500 | -1.31191700 |
| C | -0.55362300 | 1.82968800  | -0.92691700 |
| H | -1.52105400 | 2.17909600  | -0.56467300 |
| H | -0.50239500 | 1.96360200  | -2.01263700 |
| O | 2.61457600  | 2.32845700  | 0.33104200  |
| C | -0.99529900 | -0.08348800 | 0.75439800  |
| H | -0.89244500 | 0.67438800  | 1.53960500  |
| H | -0.50624300 | -0.99565800 | 1.10683000  |
| C | -2.45586900 | -0.35443100 | 0.46761700  |
| C | -2.82984100 | -1.50425400 | -0.24450000 |
| C | -3.45887600 | 0.53281300  | 0.87841600  |
| C | -4.16846700 | -1.75629000 | -0.54068200 |
| H | -2.06295400 | -2.20870300 | -0.55785300 |
| C | -4.80103000 | 0.28258700  | 0.58404400  |
| H | -3.18872000 | 1.42025000  | 1.44599500  |
| C | -5.15901600 | -0.86178400 | -0.12820500 |
| H | -4.43995900 | -2.65409000 | -1.08851600 |
| H | -5.56494300 | 0.97992100  | 0.91572900  |
| H | -6.20230300 | -1.05943700 | -0.35590000 |

## TS-endo-regioA-1

|   |             |             |             |
|---|-------------|-------------|-------------|
| C | -3.01618100 | -2.84777600 | -2.57581400 |
| H | -2.48641400 | -3.25578500 | -3.44498900 |
| H | -3.58501200 | -1.97502300 | -2.90872100 |

|   |             |             |             |
|---|-------------|-------------|-------------|
| H | -3.72522300 | -3.61242800 | -2.24141000 |
| C | -2.02855700 | -2.46987200 | -1.49124100 |
| H | -1.49860000 | -3.29441400 | -1.01648700 |
| C | -1.30464800 | -1.28462600 | -1.59548800 |
| H | -1.59190600 | -0.51442300 | -2.29755800 |
| C | -0.04288100 | -1.15101600 | -0.89206300 |
| O | 0.37478800  | -1.94922600 | -0.04092000 |
| N | 0.79212400  | -0.04589000 | -1.19165800 |
| C | 0.59855800  | 0.98571000  | -2.11645200 |
| O | 1.62247900  | 1.87557800  | -1.98318500 |
| C | 2.09945900  | 0.07853900  | -0.53607400 |
| H | 1.98990600  | -0.12932100 | 0.52854500  |
| C | 2.38940400  | 1.56086200  | -0.80275700 |
| H | 3.44048800  | 1.76592300  | -1.01078000 |
| H | 2.04444000  | 2.19900000  | 0.01709100  |
| O | -0.28395200 | 1.12552900  | -2.92730900 |
| C | 3.14043700  | -0.88812400 | -1.14804000 |
| H | 3.29660800  | -0.61856000 | -2.19904900 |
| H | 2.70244600  | -1.88960200 | -1.12233900 |
| C | 4.45413800  | -0.87693700 | -0.39889300 |
| C | 4.55575200  | -1.50516700 | 0.85192000  |
| C | 5.58564600  | -0.23124200 | -0.91363000 |
| C | 5.75196800  | -1.48478900 | 1.56741700  |
| H | 3.68872000  | -2.02154700 | 1.25709500  |
| C | 6.78609700  | -0.20961400 | -0.20013400 |
| H | 5.53001600  | 0.24723800  | -1.88852800 |
| C | 6.87217500  | -0.83488600 | 1.04352300  |
| H | 5.81302300  | -1.98173500 | 2.53157900  |
| H | 7.65365500  | 0.29197800  | -0.61943000 |
| H | 7.80562900  | -0.82178900 | 1.59851600  |
| C | -3.01472200 | 3.25245300  | -0.67390700 |
| C | -2.67929100 | 2.06006200  | -0.07109200 |
| C | -1.66241600 | 2.02521100  | 0.90071300  |
| C | -0.94012000 | 3.16332300  | 1.30082600  |
| C | -1.30489400 | 4.38633500  | 0.67203700  |
| C | -2.30951100 | 4.41992700  | -0.28291800 |
| H | -3.79211800 | 3.29745900  | -1.42993500 |
| C | -1.44668500 | 0.70804300  | 1.41073900  |
| C | 0.06769800  | 2.96168900  | 2.28882200  |
| H | -0.78594900 | 5.30218100  | 0.94244700  |
| H | -2.56185300 | 5.36695100  | -0.75050900 |
| C | 0.29569300  | 1.68978600  | 2.78080200  |
| C | -0.44007800 | 0.54878000  | 2.35069200  |
| H | 0.65006400  | 3.80365500  | 2.65251400  |
| H | 1.06994400  | 1.54442300  | 3.52901700  |
| H | -0.18088500 | -0.41946500 | 2.76019100  |
| C | -3.20439500 | 0.67006200  | -0.22307500 |
| C | -2.37531800 | -0.16592100 | 0.69511700  |
| O | -4.15732200 | 0.31792300  | -0.91716100 |
| N | -2.69678900 | -1.44813000 | 0.98687600  |
| C | -2.08462100 | -2.22999400 | 2.09286800  |
| C | -3.00163000 | -3.45615100 | 2.19271700  |
| C | -3.36842500 | -2.26303900 | 0.12534100  |
| H | -2.07488600 | -1.62249400 | 2.99915200  |
| C | -3.59684500 | -3.61289100 | 0.77146000  |
| H | -3.80159400 | -3.26524400 | 2.91431100  |
| H | -2.45577100 | -4.34161900 | 2.52634200  |
| H | -1.06126900 | -2.48647600 | 1.80756500  |
| H | -4.10427800 | -1.77828100 | -0.50151300 |
| H | -4.65874900 | -3.87697700 | 0.79998600  |
| H | -3.09057500 | -4.40632800 | 0.20845100  |

Pr-endo-regioA-1

|   |             |             |             |
|---|-------------|-------------|-------------|
| C | 1.09422700  | 3.61917300  | -1.99871700 |
| H | 0.03702800  | 3.63409700  | -2.28460200 |
| H | 1.66506400  | 3.18657800  | -2.82764100 |
| H | 1.41408400  | 4.66008900  | -1.87623400 |
| C | 1.32023000  | 2.82498600  | -0.71107800 |
| H | 0.71942400  | 3.26532800  | 0.09158200  |
| C | 0.92659500  | 1.33317000  | -0.82323100 |
| H | 0.95114000  | 1.00256900  | -1.86127700 |
| C | -0.45196900 | 1.06192100  | -0.25475200 |
| O | -0.97669000 | 1.75203000  | 0.61131300  |
| N | -1.16925600 | -0.04870600 | -0.72402400 |

|   |             |             |             |
|---|-------------|-------------|-------------|
| C | -0.76787500 | -1.03472000 | -1.64211600 |
| O | -1.70810900 | -2.01323100 | -1.65156700 |
| C | -2.50877100 | -0.33803300 | -0.19242000 |
| H | -2.50419300 | -0.18474900 | 0.88780700  |
| C | -2.63056300 | -1.82415700 | -0.55798400 |
| H | -3.62808400 | -2.10471000 | -0.89748500 |
| H | -2.32629400 | -2.47893600 | 0.26487700  |
| O | 0.21865700  | -1.06125800 | -2.33360700 |
| C | -3.58620700 | 0.56470400  | -0.83421400 |
| H | -3.61650500 | 0.36658100  | -1.91181400 |
| H | -3.26534400 | 1.60133000  | -0.69721800 |
| C | -4.95332900 | 0.35784400  | -0.21952800 |
| C | -5.23577200 | 0.86810300  | 1.05665400  |
| C | -5.95383300 | -0.35825100 | -0.88907400 |
| C | -6.48167500 | 0.66336400  | 1.64755300  |
| H | -4.47402400 | 1.43880400  | 1.58262700  |
| C | -7.20347700 | -0.56404700 | -0.30033600 |
| H | -5.75808900 | -0.74608200 | -1.88605700 |
| C | -7.46980600 | -0.05544000 | 0.97062400  |
| H | -6.68431200 | 1.07005200  | 2.63416500  |
| H | -7.96813800 | -1.11746600 | -0.83773200 |
| H | -8.44168100 | -0.21216500 | 1.42910900  |
| C | 4.04212700  | -2.55473100 | -1.17973600 |
| C | 3.26968100  | -1.53475100 | -0.66617500 |
| C | 2.47064100  | -1.75311200 | 0.47299900  |
| C | 2.40924900  | -3.00059400 | 1.13388500  |
| C | 3.21975700  | -4.03591200 | 0.59327200  |
| C | 4.00870000  | -3.81147800 | -0.52506000 |
| H | 4.65278100  | -2.40064700 | -2.06362300 |
| C | 1.73468100  | -0.60992300 | 0.87023500  |
| C | 1.54330600  | -3.07999900 | 2.25882100  |
| H | 3.21594400  | -5.01630500 | 1.06252600  |
| H | 4.61370900  | -4.62443500 | -0.91558700 |
| C | 0.81643000  | -1.97087300 | 2.64668400  |
| C | 0.90105800  | -0.72376500 | 1.96330200  |
| H | 1.45503800  | -4.01274300 | 2.80929800  |
| H | 0.15864800  | -2.04317200 | 3.50832900  |
| H | 0.30642600  | 0.11352700  | 2.31219500  |
| C | 3.03017200  | -0.14287100 | -1.11812300 |
| C | 2.08930400  | 0.55151100  | -0.05395100 |
| O | 3.46851400  | 0.39973700  | -2.11177200 |
| N | 2.93425800  | 1.57802100  | 0.57586200  |
| C | 2.67376700  | 1.98703700  | 1.96709800  |
| C | 3.45712800  | 3.30037800  | 2.05666200  |
| C | 2.80311900  | 2.79823200  | -0.25071300 |
| H | 3.02919400  | 1.22735100  | 2.66799300  |
| C | 3.23213300  | 3.96143700  | 0.67359400  |
| H | 4.51964700  | 3.08062000  | 2.19934400  |
| H | 3.12738400  | 3.92568100  | 2.89123200  |
| H | 1.60485800  | 2.16608400  | 2.17179500  |
| H | 3.44771300  | 2.70383200  | -1.13002200 |
| H | 4.13613300  | 4.45943200  | 0.31340700  |
| H | 2.44427200  | 4.72080400  | 0.72014200  |

TS-endo-regioA-2

|   |             |             |            |
|---|-------------|-------------|------------|
| C | -3.84628300 | -2.46015900 | 2.09757700 |
| H | -4.58665000 | -3.10184200 | 1.60808600 |
| H | -4.30652900 | -1.48642700 | 2.28343100 |
| H | -3.61157600 | -2.91859000 | 3.06582300 |
| C | -2.58487500 | -2.31180700 | 1.27165200 |
| H | -2.12012700 | -3.23924500 | 0.94121500 |
| C | -1.69785400 | -1.27328800 | 1.54952800 |
| H | -1.98903600 | -0.43802900 | 2.17008600 |
| C | -0.31653800 | -1.39278800 | 1.13253400 |
| O | 0.10797600  | -2.25885800 | 0.35321000 |
| N | 0.64289200  | -0.51150900 | 1.69818100 |
| C | 0.43712200  | 0.58948900  | 2.53373900 |
| O | 1.65228800  | 1.02175300  | 2.97962500 |
| C | 2.07393700  | -0.71747100 | 1.44504200 |
| H | 2.29815600  | -1.78410200 | 1.50449700 |
| C | 2.66688700  | 0.06126700  | 2.62815300 |
| H | 3.58059300  | 0.60078000  | 2.37547000 |
| H | 2.85419700  | -0.58209200 | 3.49509000 |
| O | -0.59745900 | 1.12841700  | 2.84167600 |

|   |             |             |             |
|---|-------------|-------------|-------------|
| C | 2.50965700  | -0.18293300 | 0.06270700  |
| H | 2.32431100  | 0.89598800  | 0.02414500  |
| H | 1.85937900  | -0.65147600 | -0.67908100 |
| C | 3.95943500  | -0.48452200 | -0.24539800 |
| C | 4.35484300  | -1.79075500 | -0.57326400 |
| C | 4.94090500  | 0.51394600  | -0.19323000 |
| C | 5.69094700  | -2.08913600 | -0.83660000 |
| H | 3.60344700  | -2.57501300 | -0.62849500 |
| C | 6.28020900  | 0.21920800  | -0.45784700 |
| H | 4.65100400  | 1.53454000  | 0.04509900  |
| C | 6.65938600  | -1.08402600 | -0.77866900 |
| H | 5.97682800  | -3.10567000 | -1.09184800 |
| H | 7.02482400  | 1.00907900  | -0.41600900 |
| H | 7.69999800  | -1.31536800 | -0.98631700 |
| C | -2.68315800 | 3.41262000  | 0.57915400  |
| C | -2.38239900 | 2.23505600  | -0.06859400 |
| C | -1.27789200 | 2.17014100  | -0.93620300 |
| C | -0.44587400 | 3.27155300  | -1.20379500 |
| C | -0.76708200 | 4.47740200  | -0.52095000 |
| C | -1.84964300 | 4.53576900  | 0.34300300  |
| H | -3.53199000 | 3.47902300  | 1.25206400  |
| C | -1.12443800 | 0.87479800  | -1.52256000 |
| C | 0.60638900  | 3.06214300  | -2.14128100 |
| H | -0.15720100 | 5.36213400  | -0.68390600 |
| H | -2.06976900 | 5.46955000  | 0.85180500  |
| C | 0.75295300  | 1.82310500  | -2.73402000 |
| C | -0.09707200 | 0.71920800  | -2.44168200 |
| H | 1.27937800  | 3.87606900  | -2.39576700 |
| H | 1.55007000  | 1.67343000  | -3.45666000 |
| H | 0.08455700  | -0.21502100 | -2.95799100 |
| C | -3.04736500 | 0.90011300  | -0.08674100 |
| C | -2.18027200 | 0.03918500  | -0.94624300 |
| O | -4.12078200 | 0.61106900  | 0.44304200  |
| N | -2.52060200 | -1.22319300 | -1.29013400 |
| C | -1.75208200 | -2.04230600 | -2.26570300 |
| C | -2.24902000 | -3.47485700 | -2.02256600 |
| C | -3.44295600 | -1.96834200 | -0.61667600 |
| H | -0.68767500 | -1.94083100 | -2.06639300 |
| C | -3.60908600 | -3.29182300 | -1.31969100 |
| H | -1.54675200 | -3.98305400 | -1.35773300 |
| H | -2.32016100 | -4.04638000 | -2.95061900 |
| H | -1.97950100 | -1.67304100 | -3.27209700 |
| H | -4.26939500 | -1.41580900 | -0.19044600 |
| H | -3.83977200 | -4.10538900 | -0.62544600 |
| H | -4.43551700 | -3.24409400 | -2.04300500 |

Pr-endo-regioA-2

|   |             |             |             |
|---|-------------|-------------|-------------|
| C | -1.95408600 | -3.72530500 | 1.64424800  |
| H | -2.45905700 | -4.65914300 | 1.37340900  |
| H | -2.47514400 | -3.30102800 | 2.50977300  |
| H | -0.93586800 | -3.98433700 | 1.95357700  |
| C | -1.95302100 | -2.74473700 | 0.47046400  |
| H | -1.39901400 | -3.18423200 | -0.36616900 |
| C | -1.29442000 | -1.38574400 | 0.79763800  |
| H | -1.42502900 | -1.15011400 | 1.85460500  |
| C | 0.18565500  | -1.39592000 | 0.46416200  |
| O | 0.67302700  | -2.09254900 | -0.41802300 |
| N | 1.05750200  | -0.61013800 | 1.23127800  |
| C | 0.74102900  | 0.36189900  | 2.19385200  |
| O | 1.89552500  | 0.76777700  | 2.78214100  |
| C | 2.51268500  | -0.68332100 | 1.02836600  |
| H | 2.80782400  | -1.72952300 | 0.93012500  |
| C | 2.98756400  | -0.07472700 | 2.35588300  |
| H | 3.87855800  | 0.54522500  | 2.25267000  |
| H | 3.15966400  | -0.83554900 | 3.12449300  |
| O | -0.34068500 | 0.81064600  | 2.47662500  |
| C | 2.97310200  | 0.10084900  | -0.22088800 |
| H | 2.71266900  | 1.15728100  | -0.09163600 |
| H | 2.39940300  | -0.27679600 | -1.07073200 |
| C | 4.45595300  | -0.05224700 | -0.48032400 |
| C | 4.96193000  | -1.25769700 | -0.99031300 |
| C | 5.35587600  | 0.98459000  | -0.20202500 |
| C | 6.32871500  | -1.42254900 | -1.20995100 |
| H | 4.27453900  | -2.06716300 | -1.22469900 |



|   |             |             |             |
|---|-------------|-------------|-------------|
| C | 6.72552600  | 0.82332600  | -0.42249700 |
| H | 4.97954900  | 1.93130800  | 0.17828400  |
| C | 7.21575700  | -0.38174700 | -0.92499800 |
| H | 6.70163400  | -2.36141100 | -1.60911300 |
| H | 7.40669100  | 1.64092000  | -0.20487800 |
| H | 8.28016600  | -0.50854800 | -1.09892800 |
| C | -3.28364800 | 3.19730600  | 1.04683700  |
| C | -2.77190500 | 2.01078200  | 0.56711400  |
| C | -1.85242800 | 2.01560300  | -0.50055800 |
| C | -1.40717800 | 3.20524500  | -1.11975900 |
| C | -1.95400400 | 4.41648000  | -0.61486400 |
| C | -2.86339100 | 4.40367800  | 0.43205200  |
| H | -3.98273800 | 3.20722800  | 1.87699300  |
| C | -1.41554500 | 0.72081200  | -0.87362700 |
| C | -0.46310000 | 3.05712500  | -2.17302100 |
| H | -1.65137200 | 5.36303100  | -1.05521300 |
| H | -3.26057500 | 5.34632600  | 0.79719100  |
| C | -0.02863300 | 1.79724800  | -2.53725800 |
| C | -0.49759500 | 0.61371800  | -1.89740700 |
| H | -0.08529500 | 3.93624100  | -2.68812600 |
| H | 0.69314600  | 1.69767400  | -3.34299300 |
| H | -0.12046400 | -0.35193100 | -2.21805700 |
| C | -2.93788000 | 0.60153600  | 1.00340000  |
| C | -2.14411400 | -0.30971900 | -0.01806900 |
| O | -3.58023300 | 0.18226500  | 1.94369600  |
| N | -3.19124700 | -1.06935200 | -0.71546000 |
| C | -3.29316400 | -1.23087800 | -2.17715900 |
| C | -3.34533400 | -2.75126300 | -2.41206000 |
| C | -3.36448700 | -2.36158300 | -0.03314000 |
| H | -2.46504900 | -0.75599100 | -2.70678700 |
| C | -3.95368700 | -3.28976000 | -1.10527400 |
| H | -2.33307600 | -3.14686000 | -2.55155300 |
| H | -3.92843500 | -3.01854700 | -3.29824500 |
| H | -4.21659100 | -0.75527400 | -2.53856100 |
| H | -4.03626000 | -2.24879600 | 0.82726000  |
| H | -3.71675400 | -4.34197200 | -0.91914300 |
| H | -5.04501600 | -3.19469100 | -1.12475100 |

TS-endo-regioB-1

|   |             |             |             |
|---|-------------|-------------|-------------|
| C | 2.14383800  | -1.00558700 | -2.50144500 |
| H | 1.62140600  | -0.91732000 | -3.46156300 |
| H | 2.41238100  | -2.05682000 | -2.36388500 |
| H | 3.06572100  | -0.42203700 | -2.57820000 |
| C | 1.24766300  | -0.50816300 | -1.38742400 |
| H | 1.07511100  | 0.56487400  | -1.38713100 |
| C | 0.12579900  | -1.28505000 | -1.02357100 |
| H | 0.00288900  | -2.29680100 | -1.38390500 |
| C | -0.99324400 | -0.61533600 | -0.42026200 |
| O | -0.97205000 | 0.54972900  | 0.01219700  |
| N | -2.23894100 | -1.30854100 | -0.29247900 |
| C | -2.53865600 | -2.63392700 | -0.59891900 |
| O | -3.85327200 | -2.86004900 | -0.29975000 |
| C | -3.44758000 | -0.56872200 | 0.08799200  |
| H | -3.23921500 | 0.05324600  | 0.95967200  |
| C | -4.38377700 | -1.73700600 | 0.42828300  |
| H | -5.41389500 | -1.57120300 | 0.10967300  |
| H | -4.37363900 | -1.97829000 | 1.49754600  |
| O | -1.81886200 | -3.49711500 | -1.04115900 |
| C | -3.95750500 | 0.33169100  | -1.06197300 |
| H | -4.23685500 | -0.30464300 | -1.90970000 |
| H | -3.11739200 | 0.95677600  | -1.37657000 |
| C | -5.12275200 | 1.19986900  | -0.64291200 |
| C | -4.90629800 | 2.32018700  | 0.17420100  |
| C | -6.43543600 | 0.90134200  | -1.03041300 |
| C | -5.97189600 | 3.11457100  | 0.59466200  |
| H | -3.89085500 | 2.57162000  | 0.47131600  |
| C | -7.50527000 | 1.69568700  | -0.61202700 |
| H | -6.62018900 | 0.04676800  | -1.67704300 |
| C | -7.27649800 | 2.80338500  | 0.20388700  |
| H | -5.78453800 | 3.98084600  | 1.22288900  |
| H | -8.51520100 | 1.45018900  | -0.92782200 |
| H | -8.10659800 | 3.42383200  | 0.52865200  |
| C | 6.12807100  | -0.63313700 | -0.55473200 |
| C | 4.81884400  | -0.36627200 | -0.21165300 |

|   |             |             |             |
|---|-------------|-------------|-------------|
| C | 4.38704600  | 0.96660300  | -0.06405700 |
| C | 5.22905100  | 2.07758600  | -0.26823300 |
| C | 6.57666300  | 1.77980000  | -0.61093100 |
| C | 7.00332600  | 0.46616900  | -0.74659300 |
| H | 6.47881600  | -1.65330700 | -0.67609900 |
| C | 3.01178600  | 1.05722600  | 0.28114500  |
| C | 4.63350600  | 3.36138700  | -0.10971200 |
| H | 7.27967900  | 2.59313800  | -0.77124600 |
| H | 8.03847000  | 0.27300500  | -1.01244700 |
| C | 3.29023600  | 3.45874800  | 0.19929700  |
| C | 2.45619700  | 2.31793200  | 0.38210400  |
| H | 5.23168300  | 4.25812000  | -0.24476300 |
| H | 2.84103500  | 4.44299300  | 0.29689900  |
| H | 1.39541000  | 2.45700400  | 0.56421700  |
| C | 3.64594200  | -1.24628500 | 0.05590000  |
| C | 2.46440600  | -0.32531700 | 0.30163900  |
| O | 3.63278600  | -2.47035100 | 0.09225400  |
| N | 1.58446700  | -0.75700600 | 1.30050100  |
| C | 1.07958600  | 0.06225600  | 2.43223900  |
| C | -0.12366600 | -0.74099500 | 2.95574900  |
| C | 0.99177700  | -1.94117600 | 1.22978900  |
| H | 0.79925700  | 1.05368000  | 2.08658100  |
| C | 0.08409100  | -2.16844800 | 2.39701400  |
| H | -1.04001700 | -0.31040700 | 2.54855900  |
| H | -0.18512000 | -0.71835600 | 4.04575900  |
| H | 1.88487900  | 0.15634100  | 3.16933100  |
| H | 1.41491900  | -2.71334600 | 0.60877800  |
| H | -0.84701200 | -2.65822400 | 2.09752100  |
| H | 0.56987400  | -2.83467300 | 3.12421800  |

Pr-endo-regioB-1

|   |             |             |             |
|---|-------------|-------------|-------------|
| C | 1.59236600  | -0.31058300 | -2.60245800 |
| H | 0.72568000  | -0.12457600 | -3.24528200 |
| H | 1.95110900  | -1.32439300 | -2.79874700 |
| H | 2.37754500  | 0.39273800  | -2.90114700 |
| C | 1.20938500  | -0.11701400 | -1.13315700 |
| H | 0.80757200  | 0.88994200  | -1.00722400 |
| C | 0.11749900  | -1.12144800 | -0.64085800 |
| H | -0.13819500 | -1.85069300 | -1.40898500 |
| C | -1.14991300 | -0.39296000 | -0.22168100 |
| O | -1.19352800 | 0.79113600  | 0.07892800  |
| N | -2.34942600 | -1.12425100 | -0.16133600 |
| C | -2.56934100 | -2.48496400 | -0.43153700 |
| O | -3.85863200 | -2.77647600 | -0.11878000 |
| C | -3.60273600 | -0.45211000 | 0.21321400  |
| H | -3.41932500 | 0.19390000  | 1.07321100  |
| C | -4.46198800 | -1.66984200 | 0.58358300  |
| H | -5.49879000 | -1.58053600 | 0.25750200  |
| H | -4.43722900 | -1.88703800 | 1.65652500  |
| O | -1.79740600 | -3.30055100 | -0.86915000 |
| C | -4.17426200 | 0.39233700  | -0.94852400 |
| H | -4.41924800 | -0.27494300 | -1.78293800 |
| H | -3.38035200 | 1.06543300  | -1.28357800 |
| C | -5.39090400 | 1.19031400  | -0.53327300 |
| C | -5.24275700 | 2.32910500  | 0.27305100  |
| C | -6.68224600 | 0.80653100  | -0.91680100 |
| C | -6.35534700 | 3.05941500  | 0.68774900  |
| H | -4.24531200 | 2.64711600  | 0.56720100  |
| C | -7.79885100 | 1.53696500  | -0.50409100 |
| H | -6.81435800 | -0.06326500 | -1.55604000 |
| C | -7.63823500 | 2.66401000  | 0.30139400  |
| H | -6.22139300 | 3.94103400  | 1.30794000  |
| H | -8.79179300 | 1.22659400  | -0.81632000 |
| H | -8.50492900 | 3.23459200  | 0.62167300  |
| C | 6.13754200  | -0.38653700 | -0.99912400 |
| C | 4.82344100  | -0.18706000 | -0.62662800 |
| C | 4.42052100  | 1.06180800  | -0.10679500 |
| C | 5.30726000  | 2.14778900  | 0.06883000  |
| C | 6.65309400  | 1.91866600  | -0.32775000 |
| C | 7.04533000  | 0.69149700  | -0.84513300 |
| H | 6.46768400  | -1.34136600 | -1.39659400 |
| C | 3.05179100  | 1.10293200  | 0.23478700  |
| C | 4.75009100  | 3.33055800  | 0.62941800  |
| H | 7.38526900  | 2.71496500  | -0.22043500 |

|   |             |             |             |
|---|-------------|-------------|-------------|
| H | 8.08213600  | 0.55082500  | -1.13659800 |
| C | 3.41084700  | 3.36739000  | 0.97456900  |
| C | 2.54120600  | 2.25551200  | 0.78508300  |
| H | 5.37948200  | 4.20184700  | 0.78901700  |
| H | 3.00275100  | 4.27735000  | 1.40552900  |
| H | 1.49477100  | 2.32058700  | 1.06848600  |
| C | 3.62645400  | -1.06933200 | -0.64063300 |
| C | 2.40128800  | -0.23054400 | -0.10219600 |
| O | 3.58373100  | -2.24598300 | -0.95716000 |
| N | 1.73799300  | -0.85018700 | 1.03197000  |
| C | 2.41222700  | -1.40713300 | 2.19752000  |
| C | 1.27780100  | -2.23467900 | 2.87775300  |
| C | 0.79803200  | -1.85395900 | 0.55015900  |
| H | 2.80633800  | -0.61071800 | 2.83704100  |
| C | 0.10239400  | -2.25933600 | 1.85347700  |
| H | 0.96482200  | -1.78790400 | 3.82498600  |
| H | 1.62959800  | -3.24616700 | 3.09848000  |
| H | 3.24983400  | -2.07150300 | 1.92711500  |
| H | 1.31235700  | -2.73419500 | 0.13190300  |
| H | -0.64685200 | -1.51240600 | 2.13376100  |
| H | -0.38438100 | -3.23510800 | 1.78869100  |

TS-endo-regioB-2

|   |             |             |             |
|---|-------------|-------------|-------------|
| C | -2.41882500 | -1.38861200 | -2.21023900 |
| H | -3.36925500 | -0.85237000 | -2.28200800 |
| H | -2.61418200 | -2.38986000 | -1.81535800 |
| H | -2.03304200 | -1.50365200 | -3.23015400 |
| C | -1.40368000 | -0.64629200 | -1.36504500 |
| H | -1.24883000 | 0.39070800  | -1.65618400 |
| C | -0.22711100 | -1.32201600 | -0.97460500 |
| H | -0.18101600 | -2.40239100 | -0.99260000 |
| C | 0.99648500  | -0.57935000 | -0.84358000 |
| O | 1.10204000  | 0.65716900  | -0.88392500 |
| N | 2.22028400  | -1.30936900 | -0.70914100 |
| C | 2.40438300  | -2.65630800 | -0.40636000 |
| O | 3.72979900  | -2.95392300 | -0.55241700 |
| C | 3.51083600  | -0.62981600 | -0.86887900 |
| H | 3.45432600  | 0.06084300  | -1.71218500 |
| C | 4.40526300  | -1.84054800 | -1.17161300 |
| H | 5.40424000  | -1.76044500 | -0.74078400 |
| H | 4.48801800  | -2.03470500 | -2.24671500 |
| O | 1.59022100  | -3.46954700 | -0.03819900 |
| C | 3.92591200  | 0.15217800  | 0.39924500  |
| H | 4.04346600  | -0.55823600 | 1.22653300  |
| H | 3.09387100  | 0.81899500  | 0.63939800  |
| C | 5.19671800  | 0.94944800  | 0.20717300  |
| C | 5.17634200  | 2.13639600  | -0.54143400 |
| C | 6.41798800  | 0.52001900  | 0.74266600  |
| C | 6.34391500  | 2.86857400  | -0.75161000 |
| H | 4.23360100  | 2.48791700  | -0.95394000 |
| C | 7.58926300  | 1.25165200  | 0.53505100  |
| H | 6.45011600  | -0.38946400 | 1.33806500  |
| C | 7.55559500  | 2.42741600  | -0.21438300 |
| H | 6.30801300  | 3.78677400  | -1.33100200 |
| H | 8.52543600  | 0.90390800  | 0.96239300  |
| H | 8.46482400  | 2.99907500  | -0.37547900 |
| C | -6.03378800 | -1.16883100 | 0.20319500  |
| C | -4.76613400 | -0.62704700 | 0.24800800  |
| C | -4.56941600 | 0.73436200  | -0.05356200 |
| C | -5.61774900 | 1.60172000  | -0.41924800 |
| C | -6.91700600 | 1.02459100  | -0.45512200 |
| C | -7.10943800 | -0.31604300 | -0.15268300 |
| H | -6.20400600 | -2.21604300 | 0.43302500  |
| C | -3.20480100 | 1.12052300  | 0.04446600  |
| C | -5.25603200 | 2.95004000  | -0.70017600 |
| H | -7.76941000 | 1.64369100  | -0.72257400 |
| H | -8.11447000 | -0.72588700 | -0.19025100 |
| C | -3.93122700 | 3.33268500  | -0.61885400 |
| C | -2.88806100 | 2.43058700  | -0.25996600 |
| H | -6.01895100 | 3.67019300  | -0.98200200 |
| H | -3.66354700 | 4.36079600  | -0.84533600 |
| H | -1.86444700 | 2.78957300  | -0.24693100 |
| C | -3.43384100 | -1.20743600 | 0.57504400  |
| C | -2.41532100 | -0.10224600 | 0.35640500  |

|   |             |             |            |
|---|-------------|-------------|------------|
| O | -3.20017700 | -2.34647900 | 0.95852500 |
| N | -1.36569900 | -0.08008200 | 1.28309500 |
| C | -0.71144000 | 1.15870000  | 1.78310400 |
| C | 0.24561200  | 0.62450800  | 2.86047400 |
| C | -0.61923400 | -1.15302200 | 1.51802400 |
| H | -1.46943800 | 1.84272200  | 2.16761500 |
| C | 0.51718600  | -0.84132000 | 2.44223000 |
| H | -0.24127900 | 0.64937700  | 3.83981900 |
| H | 1.15623700  | 1.22381500  | 2.92349000 |
| H | -0.17853700 | 1.62515800  | 0.95149100 |
| H | -1.00311900 | -2.13471100 | 1.29615600 |
| H | 0.54700200  | -1.53057000 | 3.29238600 |
| H | 1.47285900  | -0.95388300 | 1.91723100 |

Pr-endo-regioB-2

|   |             |             |             |
|---|-------------|-------------|-------------|
| C | 1.44494400  | -0.02104800 | -2.36343100 |
| H | 2.23857400  | -0.67072500 | -2.74729300 |
| H | 1.72073000  | 1.01724700  | -2.57177600 |
| H | 0.53293800  | -0.25229600 | -2.92242500 |
| C | 1.22533500  | -0.25037300 | -0.86744700 |
| H | 0.89963600  | -1.28724600 | -0.72092300 |
| C | 0.16349500  | 0.66551200  | -0.22418500 |
| H | 0.25345300  | 1.67761600  | -0.62105900 |
| C | -1.23790000 | 0.15053200  | -0.48130800 |
| O | -1.48578000 | -1.00618900 | -0.79880500 |
| N | -2.31643700 | 1.04216600  | -0.37363500 |
| C | -2.30779900 | 2.38015600  | 0.05420000  |
| O | -3.55084200 | 2.89398800  | -0.13992100 |
| C | -3.68527800 | 0.59989100  | -0.67780900 |
| H | -3.67448900 | 0.00241600  | -1.59103800 |
| C | -4.35902100 | 1.96348700  | -0.89073300 |
| H | -5.37820800 | 2.00552800  | -0.50545700 |
| H | -4.35467500 | 2.26960100  | -1.94211200 |
| O | -1.39946900 | 3.00669400  | 0.53624100  |
| C | -4.29613400 | -0.23291200 | 0.47221000  |
| H | -4.34951400 | 0.39211600  | 1.37112300  |
| H | -3.60525600 | -1.05455300 | 0.67911700  |
| C | -5.66485000 | -0.77753400 | 0.12629400  |
| C | -5.79081500 | -1.84946000 | -0.77048900 |
| C | -6.83020800 | -0.21886300 | 0.66678800  |
| C | -7.04650400 | -2.34349100 | -1.12055900 |
| H | -4.89501500 | -2.30374900 | -1.18730500 |
| C | -8.08954500 | -0.71257200 | 0.31937800  |
| H | -6.75100900 | 0.60119900  | 1.37660700  |
| C | -8.20098600 | -1.77486900 | -0.57732400 |
| H | -7.12438800 | -3.17675100 | -1.81299300 |
| H | -8.98106700 | -0.26905900 | 0.75326400  |
| H | -9.17912300 | -2.16175400 | -0.84725000 |
| C | 5.79237500  | 1.79968000  | -0.47036500 |
| C | 4.67844300  | 1.00312800  | -0.30183400 |
| C | 4.81141600  | -0.39904900 | -0.25074500 |
| C | 6.05507000  | -1.05558700 | -0.38827500 |
| C | 7.19032800  | -0.21490300 | -0.54579900 |
| C | 7.05516400  | 1.16576200  | -0.58033700 |
| H | 5.70291600  | 2.88024100  | -0.52291200 |
| C | 3.57503300  | -1.07016400 | -0.09031700 |
| C | 6.02483900  | -2.47746100 | -0.37028600 |
| H | 8.17570400  | -0.66210900 | -0.64842500 |
| H | 7.94263800  | 1.77907400  | -0.70628600 |
| C | 4.81829100  | -3.13823500 | -0.24256400 |
| C | 3.57959300  | -2.44765900 | -0.10686800 |
| H | 6.94915600  | -3.04005800 | -0.46906500 |
| H | 4.80666000  | -4.22438600 | -0.24522000 |
| H | 2.66190000  | -3.02087000 | -0.01950500 |
| C | 3.22723200  | 1.31290100  | -0.22802400 |
| C | 2.46209200  | -0.04030300 | 0.04328100  |
| O | 2.70209000  | 2.40367900  | -0.34890600 |
| N | 1.91082000  | 0.10765000  | 1.40530400  |
| C | 1.84636200  | -1.05021800 | 2.30704300  |
| C | 0.72865000  | -0.65339400 | 3.27384000  |
| C | 0.56417400  | 0.73364400  | 1.30230300  |
| H | 2.80925700  | -1.21279000 | 2.80175700  |
| C | -0.30578500 | -0.03028300 | 2.32338300  |
| H | 1.09682300  | 0.09248000  | 3.98643200  |

|   |             |             |            |
|---|-------------|-------------|------------|
| H | 0.33905100  | -1.50501200 | 3.83912900 |
| H | 1.57327900  | -1.98986000 | 1.79693800 |
| H | 0.62436600  | 1.78987900  | 1.56918000 |
| H | -1.02313900 | 0.62471600  | 2.82504900 |
| H | -0.86793100 | -0.83288000 | 1.83176400 |

TS-exo-regioA-1

|   |             |             |             |
|---|-------------|-------------|-------------|
| C | 2.60588400  | -3.21295800 | 2.00113800  |
| H | 2.17925300  | -3.65932900 | 2.90757700  |
| H | 3.20757500  | -2.35650900 | 2.32159100  |
| H | 3.27110700  | -3.96423800 | 1.56497500  |
| C | 1.48800400  | -2.79343400 | 1.06958200  |
| H | 0.84769400  | -3.60027400 | 0.71510000  |
| C | 0.83860200  | -1.57817100 | 1.29991500  |
| H | 1.23611200  | -0.83629300 | 1.97810300  |
| C | -0.47515000 | -1.38037600 | 0.71807200  |
| O | -0.99658900 | -2.17069400 | -0.07362400 |
| N | -1.20070300 | -0.20615400 | 1.03923700  |
| C | -0.91153500 | 0.76977800  | 1.99418000  |
| O | -1.84559300 | 1.75760500  | 1.89196300  |
| C | -2.48699100 | 0.05941800  | 0.38483400  |
| H | -2.38431400 | -0.12392500 | -0.68607600 |
| C | -2.63940000 | 1.55340000  | 0.70495200  |
| H | -3.66750100 | 1.84509100  | 0.92392000  |
| H | -2.23929900 | 2.18984200  | -0.09090700 |
| O | -0.02141500 | 0.79455200  | 2.80967600  |
| C | -3.62347900 | -0.82061700 | 0.95569900  |
| H | -3.75578700 | -0.58009100 | 2.01710300  |
| H | -3.28941300 | -1.85890500 | 0.88688800  |
| C | -4.92585800 | -0.64057100 | 0.20783000  |
| C | -5.07772600 | -1.17692800 | -1.08030500 |
| C | -5.99478100 | 0.07537200  | 0.76208400  |
| C | -6.26237400 | -0.99799000 | -1.79294500 |
| H | -4.26066000 | -1.74479200 | -1.51874300 |
| C | -7.18354800 | 0.25520500  | 0.05137200  |
| H | -5.89969400 | 0.48512100  | 1.76493700  |
| C | -7.31984200 | -0.27969200 | -1.22936000 |
| H | -6.36295700 | -1.42382600 | -2.78728600 |
| H | -8.00247400 | 0.80953400  | 0.50110900  |
| H | -8.24402000 | -0.14316600 | -1.78335400 |
| C | 0.26255400  | 2.55615600  | -1.78208200 |
| C | 1.16605800  | 1.63236900  | -1.30125400 |
| C | 2.27537400  | 2.06214800  | -0.55107200 |
| C | 2.51789000  | 3.41010100  | -0.23467800 |
| C | 1.56823000  | 4.34659800  | -0.72831700 |
| C | 0.48090300  | 3.92543000  | -1.47932000 |
| H | -0.58732000 | 2.24640700  | -2.38322200 |
| C | 3.11909300  | 0.97539600  | -0.16640600 |
| C | 3.69153400  | 3.68431800  | 0.52553800  |
| H | 1.70123200  | 5.40436900  | -0.51747400 |
| H | -0.22326700 | 4.66496800  | -1.84935100 |
| C | 4.51425100  | 2.64249000  | 0.90728400  |
| C | 4.24815700  | 1.28434300  | 0.57522700  |
| H | 3.93548300  | 4.70613700  | 0.80125400  |
| H | 5.40494500  | 2.85958900  | 1.48994300  |
| H | 4.93770500  | 0.52406900  | 0.92385000  |
| C | 1.26332000  | 0.14548100  | -1.44050300 |
| C | 2.48026300  | -0.23978100 | -0.67126500 |
| O | 0.53276400  | -0.57641000 | -2.11614800 |
| N | 3.02188300  | -1.47904600 | -0.75616600 |
| C | 4.44394800  | -1.78193300 | -0.49074900 |
| C | 4.61598500  | -3.23182300 | -0.98640500 |
| C | 2.27284100  | -2.62106800 | -0.83017000 |
| H | 4.64620200  | -1.68630200 | 0.58076500  |
| C | 3.17418400  | -3.78699600 | -1.16103500 |
| H | 5.20420200  | -3.81995900 | -0.27841000 |
| H | 5.14847700  | -3.24499900 | -1.94043600 |
| H | 5.06790100  | -1.06019100 | -1.02211400 |
| H | 1.29418200  | -2.51706400 | -1.28418900 |
| H | 2.97386900  | -4.64741300 | -0.51448400 |
| H | 3.00082100  | -4.12584300 | -2.18854300 |

Pr-exo-regioA-1

|   |             |             |             |
|---|-------------|-------------|-------------|
| C | -2.47294500 | -3.02483100 | -2.23291300 |
| H | -1.92104300 | -2.79646000 | -3.15085700 |
| H | -3.37602200 | -2.40652700 | -2.21726900 |
| H | -2.78318500 | -4.07323400 | -2.28956900 |
| C | -1.60167700 | -2.77137000 | -0.99867000 |
| H | -0.75476000 | -3.46059600 | -1.00111000 |
| C | -1.06029400 | -1.30605400 | -0.96033300 |
| H | -1.16080700 | -0.81356700 | -1.92868100 |
| C | 0.41708800  | -1.27879600 | -0.57518900 |
| O | 1.00167300  | -2.22496300 | -0.07744500 |
| N | 1.12288800  | -0.07622300 | -0.75188100 |
| C | 0.81606100  | 1.01188700  | -1.58794200 |
| O | 1.73884000  | 1.98279800  | -1.36969700 |
| C | 2.45943800  | 0.09786900  | -0.15929300 |
| H | 2.43825300  | -0.26031600 | 0.87150400  |
| C | 2.56512900  | 1.62611000  | -0.23839700 |
| H | 3.57738200  | 1.98288300  | -0.42929700 |
| H | 2.16111300  | 2.11654600  | 0.65312900  |
| O | -0.07293600 | 1.11142000  | -2.39576300 |
| C | 3.55847300  | -0.64604400 | -0.95287400 |
| H | 3.59200400  | -0.24170400 | -1.97127600 |
| H | 3.25561900  | -1.69384700 | -1.02015900 |
| C | 4.91762600  | -0.53323500 | -0.29750400 |
| C | 5.20832000  | -1.27698300 | 0.85638400  |
| C | 5.90349200  | 0.32264300  | -0.80571200 |
| C | 6.44716900  | -1.16330600 | 1.48558500  |
| H | 4.45870900  | -1.95579800 | 1.25595300  |
| C | 7.14601600  | 0.43761900  | -0.17868500 |
| H | 5.70176000  | 0.89404400  | -1.70868400 |
| C | 7.42021900  | -0.30365100 | 0.97038400  |
| H | 6.65564600  | -1.75027600 | 2.37543700  |
| H | 7.89900100  | 1.10277500  | -0.59157500 |
| H | 8.38649800  | -0.21758700 | 1.45853100  |
| C | -0.92864700 | 2.46262600  | 2.28617500  |
| C | -1.38930500 | 1.49874500  | 1.41049400  |
| C | -2.23276700 | 1.86013300  | 0.33882700  |
| C | -2.65606400 | 3.18902800  | 0.10984200  |
| C | -2.16036500 | 4.16389800  | 1.01735700  |
| C | -1.32313700 | 3.80567900  | 2.06560400  |
| H | -0.29104300 | 2.19752800  | 3.12421400  |
| C | -2.62826700 | 0.75993400  | -0.45181800 |
| C | -3.53667100 | 3.38945000  | -0.98799500 |
| H | -2.44647100 | 5.20486300  | 0.89084700  |
| H | -0.96708100 | 4.57693600  | 2.74236100  |
| C | -3.93966200 | 2.31005200  | -1.75226200 |
| C | -3.49823800 | 0.98196700  | -1.49258700 |
| H | -3.89393600 | 4.38870900  | -1.22065200 |
| H | -4.61681000 | 2.47694500  | -2.58501100 |
| H | -3.84684000 | 0.16674400  | -2.11909300 |
| C | -1.19226000 | 0.02924100  | 1.34754900  |
| C | -1.98479700 | -0.51402100 | 0.08578500  |
| O | -0.58559400 | -0.66738900 | 2.14226200  |
| N | -2.96343700 | -1.53450700 | 0.42438100  |
| C | -3.82540400 | -1.50289000 | 1.59920400  |
| C | -4.38670000 | -2.95716000 | 1.64431500  |
| C | -2.35189600 | -2.85864400 | 0.34182100  |
| H | -4.60892800 | -0.74540900 | 1.48924100  |
| C | -3.55912900 | -3.76457200 | 0.59654200  |
| H | -5.45370900 | -2.98407000 | 1.40772600  |
| H | -4.26972800 | -3.37359500 | 2.64869200  |
| H | -3.27021500 | -1.28458700 | 2.52613800  |
| H | -1.60791700 | -3.01208500 | 1.14277500  |
| H | -4.13917400 | -3.89514200 | -0.32070200 |
| H | -3.27518700 | -4.75491900 | 0.96286200  |

TS-exo-regioA-2

|   |             |             |            |
|---|-------------|-------------|------------|
| C | -3.04172400 | -2.98979600 | 1.89466900 |
| H | -3.70575300 | -3.68693600 | 1.37474700 |
| H | -3.59040900 | -2.06332900 | 2.09118900 |
| H | -2.81504000 | -3.43939400 | 2.86904900 |
| C | -1.75229200 | -2.72594400 | 1.14626500 |
| H | -1.15670200 | -3.60791700 | 0.91415500 |
| C | -1.02013200 | -1.57600200 | 1.44898300 |
| H | -1.43837800 | -0.76048900 | 2.02194100 |

|   |             |             |             |
|---|-------------|-------------|-------------|
| C | 0.38722200  | -1.55310900 | 1.09549400  |
| O | 0.93766700  | -2.43180300 | 0.42587400  |
| N | 1.20042300  | -0.48980300 | 1.56218400  |
| C | 0.84637800  | 0.61770100  | 2.33288300  |
| O | 1.98884500  | 1.27467200  | 2.68686800  |
| C | 2.63435900  | -0.48346200 | 1.25236400  |
| H | 3.03035900  | -1.49294100 | 1.37423300  |
| C | 3.13596400  | 0.46947200  | 2.34669300  |
| H | 3.93448500  | 1.13224300  | 2.01019500  |
| H | 3.46420900  | -0.06490700 | 3.24520800  |
| O | -0.25187200 | 0.99571700  | 2.66228300  |
| C | 2.91824400  | 0.00673200  | -0.18632200 |
| H | 2.64702400  | 1.06679600  | -0.25142900 |
| H | 2.25466100  | -0.54212200 | -0.85987700 |
| C | 4.36358400  | -0.19510700 | -0.58260500 |
| C | 4.82853000  | -1.48045600 | -0.90157800 |
| C | 5.27238600  | 0.87016100  | -0.61947800 |
| C | 6.16350700  | -1.69310700 | -1.24150400 |
| H | 4.12955200  | -2.31321900 | -0.88889600 |
| C | 6.61058100  | 0.66097900  | -0.96076300 |
| H | 4.92625300  | 1.87557600  | -0.39083400 |
| C | 7.06031500  | -0.62215300 | -1.27084800 |
| H | 6.50405100  | -2.69440500 | -1.48987400 |
| H | 7.29856000  | 1.50138300  | -0.98771600 |
| H | 8.09988400  | -0.78710600 | -1.53877900 |
| C | 0.19648900  | 2.50535400  | -1.48655200 |
| C | -0.81928300 | 1.63323100  | -1.15807700 |
| C | -2.01305600 | 2.12846800  | -0.60250700 |
| C | -2.23412700 | 3.49012000  | -0.33461300 |
| C | -1.16893200 | 4.37178400  | -0.66688100 |
| C | 0.00296500  | 3.88701500  | -1.22718500 |
| H | 1.11737300  | 2.14786400  | -1.93643400 |
| C | -2.96481500 | 1.09227600  | -0.35954600 |
| C | -3.50126300 | 3.83258000  | 0.21974000  |
| H | -1.27933600 | 5.43716500  | -0.48273600 |
| H | 0.79722800  | 4.58461000  | -1.47636300 |
| C | -4.42962900 | 2.83926600  | 0.46393100  |
| C | -4.18350600 | 1.46583900  | 0.18426600  |
| H | -3.73350200 | 4.86889800  | 0.44757300  |
| H | -5.39175500 | 3.10875100  | 0.89021900  |
| H | -4.95971100 | 0.74506900  | 0.41530000  |
| C | -0.96967500 | 0.15159800  | -1.30348100 |
| C | -2.31653300 | -0.15870400 | -0.74963600 |
| O | -0.17987100 | -0.62049400 | -1.84699000 |
| N | -2.90202900 | -1.36930900 | -0.91026600 |
| C | -4.36489700 | -1.58954900 | -0.89198300 |
| C | -4.52691800 | -3.01953900 | -1.44108900 |
| C | -2.21866400 | -2.55318300 | -0.85717000 |
| H | -4.84838500 | -0.82683300 | -1.50560500 |
| C | -3.12526400 | -3.67632400 | -1.30561800 |
| H | -4.82937000 | -2.98511200 | -2.49076100 |
| H | -5.30060500 | -3.56648400 | -0.89727900 |
| H | -4.73838600 | -1.49363400 | 0.13228700  |
| H | -1.17713200 | -2.51494500 | -1.15371600 |
| H | -2.78527900 | -4.09107400 | -2.26077900 |
| H | -3.11969900 | -4.50532000 | -0.58981700 |

Pr-exo-regioA-2

|   |             |             |             |
|---|-------------|-------------|-------------|
| C | -1.93131500 | -3.52134100 | -1.43418000 |
| H | -2.58432000 | -4.03041200 | -2.15106400 |
| H | -2.09606600 | -3.97003600 | -0.44958500 |
| H | -0.89890200 | -3.74001200 | -1.72810800 |
| C | -2.18466300 | -2.01218200 | -1.43813300 |
| H | -1.88800600 | -1.60972500 | -2.40925200 |
| C | -1.40399800 | -1.22711000 | -0.35777700 |
| H | -1.54814000 | -1.70555600 | 0.61201700  |
| C | 0.07243600  | -1.08532600 | -0.63963800 |
| O | 0.50750700  | -0.53060700 | -1.63780100 |
| N | 1.00291400  | -1.62245700 | 0.27200300  |
| C | 0.79574800  | -2.24537000 | 1.51477200  |
| O | 1.99192000  | -2.70034800 | 1.96559300  |
| C | 2.44306500  | -1.49350500 | -0.00731200 |
| H | 2.62491200  | -1.73270300 | -1.05610100 |
| C | 2.99372500  | -2.57202200 | 0.93379400  |

|   |             |             |             |
|---|-------------|-------------|-------------|
| H | 3.93694400  | -2.29335600 | 1.40455300  |
| H | 3.10581500  | -3.54210300 | 0.43850000  |
| O | -0.22846100 | -2.37899900 | 2.13980200  |
| C | 2.96533600  | -0.07007700 | 0.29401100  |
| H | 2.83914200  | 0.13349800  | 1.36363700  |
| H | 2.33255500  | 0.63276500  | -0.25405400 |
| C | 4.41228200  | 0.10578100  | -0.11216600 |
| C | 4.75162500  | 0.22491100  | -1.46858000 |
| C | 5.44068600  | 0.13007100  | 0.83855400  |
| C | 6.08235700  | 0.35768100  | -1.86201600 |
| H | 3.96269100  | 0.22339800  | -2.21694900 |
| C | 6.77472100  | 0.26462600  | 0.44756200  |
| H | 5.19453700  | 0.05686400  | 1.89533200  |
| C | 7.09910700  | 0.37609100  | -0.90420100 |
| H | 6.32596800  | 0.45306900  | -2.91622000 |
| H | 7.55772600  | 0.28640600  | 1.20006800  |
| H | 8.13558000  | 0.48277100  | -1.21027000 |
| C | -1.29339700 | 3.58918600  | -1.72591900 |
| C | -1.57488600 | 2.40584700  | -1.07549400 |
| C | -1.47282700 | 2.32639500  | 0.32719500  |
| C | -1.06176900 | 3.41705200  | 1.12679300  |
| C | -0.78444000 | 4.62824800  | 0.43666800  |
| C | -0.90193800 | 4.70426800  | -0.94376200 |
| H | -1.36332700 | 3.66010200  | -2.80678800 |
| C | -1.78516000 | 1.04410200  | 0.83970800  |
| C | -0.95613300 | 3.17286700  | 2.52374000  |
| H | -0.46992600 | 5.50320200  | 0.99974800  |
| H | -0.67869200 | 5.64378400  | -1.44092500 |
| C | -1.22680800 | 1.91392100  | 3.02442100  |
| C | -1.63450800 | 0.83087000  | 2.19357900  |
| H | -0.64933100 | 3.97347500  | 3.19138400  |
| H | -1.12367400 | 1.73425300  | 4.09069200  |
| H | -1.79463000 | -0.14529200 | 2.63848200  |
| C | -1.97318700 | 1.06594000  | -1.57823300 |
| C | -2.17698300 | 0.12815000  | -0.31222400 |
| O | -2.19647700 | 0.75744400  | -2.73072900 |
| N | -3.58686300 | -0.29017300 | -0.38383700 |
| C | -4.38096600 | -0.43224100 | 0.84578300  |
| C | -5.42194400 | -1.48656000 | 0.45992600  |
| C | -3.65735000 | -1.55609900 | -1.17774700 |
| H | -4.82327500 | 0.52606800  | 1.13814700  |
| C | -4.57803200 | -2.47823400 | -0.35480200 |
| H | -6.20019800 | -1.03719800 | -0.16699400 |
| H | -5.90409900 | -1.93827600 | 1.33163100  |
| H | -3.79382400 | -0.79843400 | 1.70343000  |
| H | -4.12320900 | -1.34375500 | -2.14736000 |
| H | -5.17255200 | -3.14639100 | -0.98448600 |
| H | -3.99666300 | -3.10355600 | 0.33251700  |

TS-exo-regioB-1

|   |             |             |             |
|---|-------------|-------------|-------------|
| C | -1.94838200 | -0.55500900 | 2.46211300  |
| H | -1.38313500 | -0.32044200 | 3.37445600  |
| H | -2.14297400 | -1.63288100 | 2.47484300  |
| H | -2.90608200 | -0.03487800 | 2.53237100  |
| C | -1.14413600 | -0.13756500 | 1.25563700  |
| H | -0.98887700 | 0.93286600  | 1.14804900  |
| C | -0.08669900 | -0.94967300 | 0.79654500  |
| H | 0.01380700  | -1.95563400 | 1.18528300  |
| C | 1.13900300  | -0.29640000 | 0.34345100  |
| O | 1.24163800  | 0.89216800  | 0.05410800  |
| N | 2.32363700  | -1.08589800 | 0.20757100  |
| C | 2.53952100  | -2.43180200 | 0.49060200  |
| O | 3.81939400  | -2.74778800 | 0.14695600  |
| C | 3.57765700  | -0.42699100 | -0.18488100 |
| H | 3.38600100  | 0.23423100  | -1.03092400 |
| C | 4.40879700  | -1.65251400 | -0.58494700 |
| H | 5.45930700  | -1.57426400 | -0.30220400 |
| H | 4.33712100  | -1.87357900 | -1.65554600 |
| O | 1.77734000  | -3.24985200 | 0.95597900  |
| C | 4.19100900  | 0.39214000  | 0.97464600  |
| H | 4.46415500  | -0.29290800 | 1.78588600  |
| H | 3.40884600  | 1.05778900  | 1.34821200  |
| C | 5.39259900  | 1.19857800  | 0.53437800  |
| C | 5.21520800  | 2.34892100  | -0.24987400 |



|   |             |             |             |
|---|-------------|-------------|-------------|
| C | 6.69688800  | 0.81434400  | 0.87069200  |
| C | 6.31177600  | 3.08960700  | -0.68803400 |
| H | 4.20735400  | 2.66554300  | -0.50751100 |
| C | 7.79759700  | 1.55538500  | 0.43451300  |
| H | 6.85180200  | -0.06513200 | 1.49140400  |
| C | 7.60782200  | 2.69395800  | -0.34808500 |
| H | 6.15514400  | 3.97972700  | -1.29067600 |
| H | 8.80111000  | 1.24405500  | 0.71035700  |
| H | 8.46203900  | 3.27284600  | -0.68682500 |
| C | -3.59881000 | 3.25184700  | -0.96162800 |
| C | -3.40784500 | 1.90851800  | -0.71783200 |
| C | -4.38424300 | 1.16972100  | -0.02558300 |
| C | -5.58590500 | 1.73511600  | 0.44274600  |
| C | -5.76363100 | 3.12219700  | 0.18511400  |
| C | -4.79578400 | 3.84981000  | -0.49197700 |
| H | -2.85688500 | 3.83331500  | -1.49998600 |
| C | -4.01789200 | -0.19984400 | 0.13115600  |
| C | -6.48960400 | 0.85347700  | 1.10199100  |
| H | -6.67250700 | 3.61512400  | 0.52037600  |
| H | -4.96172800 | 4.90768800  | -0.67358400 |
| C | -6.15149500 | -0.47643700 | 1.25398200  |
| C | -4.92027100 | -1.02019400 | 0.78655300  |
| H | -7.43727200 | 1.22680000  | 1.47954900  |
| H | -6.84422600 | -1.14353900 | 1.75925100  |
| H | -4.71767900 | -2.06840100 | 0.97388700  |
| C | -2.31708200 | 0.96142700  | -1.09342000 |
| C | -2.64763300 | -0.34069000 | -0.40853900 |
| O | -1.37415700 | 1.19299400  | -1.83867500 |
| N | -2.13176700 | -1.51145500 | -0.94418100 |
| C | -2.69927800 | -2.85177800 | -0.68490000 |
| C | -1.82290000 | -3.76688700 | -1.55062500 |
| C | -0.82870100 | -1.60162100 | -1.27740800 |
| H | -3.75478800 | -2.86658000 | -0.96054700 |
| C | -0.46858000 | -3.02186200 | -1.63454100 |
| H | -2.26403300 | -3.86287400 | -2.54717700 |
| H | -1.73343300 | -4.76803900 | -1.12357800 |
| H | -2.61053000 | -3.08810300 | 0.38342400  |
| H | -0.36264300 | -0.72317600 | -1.69936900 |
| H | -0.01815500 | -3.08978800 | -2.63051500 |
| H | 0.25741900  | -3.42313300 | -0.92066100 |

Pr-exo-regioB-1

|   |             |             |             |
|---|-------------|-------------|-------------|
| C | 1.06646700  | -1.29091300 | 1.52841100  |
| H | 0.08463500  | -1.74364000 | 1.70157800  |
| H | 1.26514800  | -0.58323900 | 2.33839800  |
| H | 1.81156000  | -2.09016500 | 1.59324000  |
| C | 1.09015600  | -0.61847500 | 0.15742100  |
| H | 0.81560700  | -1.36156000 | -0.59741300 |
| C | 0.07864700  | 0.55125700  | 0.00050300  |
| H | 0.10095800  | 1.21987000  | 0.86129900  |
| C | -1.33151300 | 0.05691500  | -0.24782100 |
| O | -1.58283600 | -1.00523100 | -0.79707600 |
| N | -2.41223500 | 0.88134800  | 0.11456900  |
| C | -2.41254700 | 2.10275200  | 0.81155200  |
| O | -3.68086300 | 2.58739700  | 0.81317000  |
| C | -3.78926000 | 0.45314400  | -0.18076200 |
| H | -3.82891400 | 0.05193100  | -1.19463700 |
| C | -4.51405200 | 1.79992500  | -0.06428400 |
| H | -5.50488800 | 1.72032300  | 0.38377400  |
| H | -4.58931800 | 2.31744400  | -1.02633000 |
| O | -1.49429500 | 2.66920900  | 1.34975200  |
| C | -4.28817400 | -0.61759000 | 0.81637700  |
| H | -4.29287100 | -0.18610500 | 1.82411500  |
| H | -3.56140100 | -1.43442100 | 0.80821400  |
| C | -5.66314500 | -1.13849900 | 0.45875100  |
| C | -5.82461700 | -2.01427400 | -0.62557900 |
| C | -6.80066100 | -0.74573000 | 1.17571300  |
| C | -7.08896500 | -2.47817500 | -0.98558800 |
| H | -4.94928800 | -2.33965400 | -1.18279800 |
| C | -8.06839700 | -1.21001000 | 0.81847300  |
| H | -6.69187500 | -0.08107800 | 2.02961300  |
| C | -8.21593600 | -2.07578700 | -0.26484300 |
| H | -7.19454900 | -3.15879400 | -1.82545100 |
| H | -8.93781100 | -0.89789900 | 1.38987800  |

|   |             |             |             |
|---|-------------|-------------|-------------|
| H | -9.20050500 | -2.43970000 | -0.54317500 |
| C | 5.41054100  | -2.29865300 | -1.28368300 |
| C | 4.44726200  | -1.42988100 | -0.81185400 |
| C | 4.64419900  | -0.75231900 | 0.41092100  |
| C | 5.81539400  | -0.89634100 | 1.18902100  |
| C | 6.78677600  | -1.80512100 | 0.68775400  |
| C | 6.58081500  | -2.48339400 | -0.50573900 |
| H | 5.27859200  | -2.82125800 | -2.22605000 |
| C | 3.57699000  | 0.11126700  | 0.74628800  |
| C | 5.89262700  | -0.10104800 | 2.36577200  |
| H | 7.70717900  | -1.96375900 | 1.24392400  |
| H | 7.34556200  | -3.16811200 | -0.86072700 |
| C | 4.86284800  | 0.76665600  | 2.68026300  |
| C | 3.69535400  | 0.89044700  | 1.87385500  |
| H | 6.76603900  | -0.16915800 | 3.00855900  |
| H | 4.94218000  | 1.37766900  | 3.57500500  |
| H | 2.91784700  | 1.59614700  | 2.15062200  |
| C | 3.14050300  | -0.98357000 | -1.35937800 |
| C | 2.48102700  | -0.00727700 | -0.30705300 |
| O | 2.64681700  | -1.27019100 | -2.43454100 |
| N | 2.08348300  | 1.27768200  | -0.85258100 |
| C | 2.82301100  | 2.08194200  | -1.81246300 |
| C | 1.79120700  | 3.19326600  | -2.18321600 |
| C | 0.67662200  | 1.29159300  | -1.21427400 |
| H | 3.11307100  | 1.51250700  | -2.71070800 |
| C | 0.45337500  | 2.77866000  | -1.49740000 |
| H | 1.67527600  | 3.24981600  | -3.26931500 |
| H | 2.11894100  | 4.17870900  | -1.84238300 |
| H | 3.73645200  | 2.48357000  | -1.35987200 |
| H | 0.46633200  | 0.69791900  | -2.12386000 |
| H | -0.41485000 | 2.96828000  | -2.13547700 |
| H | 0.31222500  | 3.31708500  | -0.55720100 |

TS-exo-regioB-2

|   |             |             |             |
|---|-------------|-------------|-------------|
| C | -2.31396100 | -1.15385700 | -2.27768000 |
| H | -3.29460700 | -0.67355000 | -2.30861900 |
| H | -2.45513800 | -2.19873100 | -1.98061300 |
| H | -1.92437200 | -1.16276800 | -3.30505400 |
| C | -1.34114900 | -0.43544500 | -1.37553200 |
| H | -1.22884000 | 0.62884800  | -1.56557600 |
| C | -0.17815300 | -1.09599200 | -0.92197900 |
| H | -0.09890000 | -2.16758600 | -1.05884200 |
| C | 1.07532800  | -0.34591800 | -0.88902600 |
| O | 1.16903600  | 0.87774700  | -0.90174300 |
| N | 2.30251900  | -1.07785300 | -0.85628600 |
| C | 2.52528300  | -2.45203400 | -0.83158700 |
| O | 3.85602300  | -2.68040400 | -1.00378900 |
| C | 3.57333700  | -0.34069500 | -0.88081600 |
| H | 3.49983600  | 0.47444500  | -1.60205900 |
| C | 4.52050800  | -1.44965100 | -1.35991700 |
| H | 5.49388000  | -1.42982000 | -0.86799100 |
| H | 4.66331200  | -1.43536300 | -2.44570000 |
| O | 1.73315800  | -3.35309300 | -0.66513100 |
| C | 3.92883600  | 0.24188700  | 0.50622300  |
| H | 4.06730600  | -0.58516500 | 1.21277800  |
| H | 3.06596800  | 0.82578100  | 0.83771700  |
| C | 5.16332700  | 1.11496700  | 0.46500300  |
| C | 5.09562500  | 2.39912100  | -0.09706200 |
| C | 6.39608700  | 0.66445700  | 0.95425400  |
| C | 6.22999400  | 3.20585700  | -0.17144000 |
| H | 4.14185600  | 2.76684100  | -0.46782900 |
| C | 7.53415800  | 1.47092100  | 0.88242200  |
| H | 6.46305000  | -0.32156400 | 1.40818300  |
| C | 7.45439600  | 2.74320400  | 0.31689600  |
| H | 6.15770500  | 4.19914100  | -0.60522500 |
| H | 8.47997300  | 1.10537700  | 1.27209900  |
| H | 8.33739900  | 3.37312400  | 0.26193300  |
| C | -3.59619900 | 3.34635900  | 0.27096600  |
| C | -3.37169300 | 1.98948300  | 0.36402300  |
| C | -4.40406800 | 1.07865600  | 0.07845800  |
| C | -5.69986300 | 1.48372200  | -0.29638300 |
| C | -5.91133100 | 2.88639100  | -0.39423200 |
| C | -4.88708900 | 3.78151800  | -0.12200100 |
| H | -2.80953500 | 4.05947900  | 0.49680500  |

|   |             |             |             |
|---|-------------|-------------|-------------|
| C | -3.98914000 | -0.27810000 | 0.23450900  |
| C | -6.65336600 | 0.44825000  | -0.51172400 |
| H | -6.89158000 | 3.25910700  | -0.67994600 |
| H | -5.08138200 | 4.84698200  | -0.20357600 |
| C | -6.27242600 | -0.86789500 | -0.34585000 |
| C | -4.94988200 | -1.25182300 | 0.01931300  |
| H | -7.67197600 | 0.69531500  | -0.79700900 |
| H | -7.00453100 | -1.65452500 | -0.50539400 |
| H | -4.73593200 | -2.30949300 | 0.11287200  |
| C | -2.18099000 | 1.19542100  | 0.78424600  |
| C | -2.53845500 | -0.24852100 | 0.53274600  |
| O | -1.14603800 | 1.63934100  | 1.26458100  |
| N | -1.84808800 | -1.23454800 | 1.21974200  |
| C | -2.34861000 | -2.61792300 | 1.39493500  |
| C | -1.09530200 | -3.44622400 | 1.75351800  |
| C | -0.50563300 | -1.17433200 | 1.32300900  |
| H | -2.80510700 | -2.96716100 | 0.46617900  |
| C | 0.01956300  | -2.40609500 | 2.00000600  |
| H | -0.81630200 | -4.08746000 | 0.91441900  |
| H | -1.26947800 | -4.08770400 | 2.61996000  |
| H | -3.11571500 | -2.62157300 | 2.17560800  |
| H | -0.06354300 | -0.19342300 | 1.42835600  |
| H | 0.97711400  | -2.72835800 | 1.58834500  |
| H | 0.16628800  | -2.20637500 | 3.07084400  |

Pr-exo-regioB-2

|   |             |             |             |
|---|-------------|-------------|-------------|
| C | -1.40458300 | 0.12813800  | -2.18012600 |
| H | -2.20720100 | 0.75413700  | -2.58267100 |
| H | -1.65964800 | -0.91509700 | -2.38722600 |
| H | -0.49093500 | 0.37327200  | -2.73221500 |
| C | -1.19444300 | 0.38312300  | -0.68921200 |
| H | -0.87613200 | 1.42130600  | -0.55409400 |
| C | -0.08679400 | -0.49665700 | -0.03948800 |
| H | -0.18062300 | -1.54017100 | -0.33860100 |
| C | 1.29974800  | 0.03274300  | -0.33874300 |
| O | 1.55483200  | 1.22644400  | -0.40063100 |
| N | 2.35344100  | -0.87594300 | -0.54215800 |
| C | 2.34727000  | -2.28103000 | -0.49472000 |
| O | 3.56712800  | -2.72265300 | -0.89604600 |
| C | 3.71079000  | -0.37097700 | -0.80418200 |
| H | 3.65534900  | 0.45183700  | -1.51845600 |
| C | 4.34626000  | -1.62530200 | -1.41805800 |
| H | 5.38579200  | -1.77175500 | -1.12318500 |
| H | 4.27260400  | -1.63765900 | -2.51052500 |
| O | 1.46062600  | -3.02422600 | -0.15554900 |
| C | 4.40091200  | 0.11823500  | 0.48935800  |
| H | 4.50680800  | -0.73013800 | 1.17530100  |
| H | 3.73184200  | 0.84434900  | 0.95920200  |
| C | 5.74822700  | 0.75104900  | 0.21790900  |
| C | 5.82112600  | 2.03299500  | -0.34793500 |
| C | 6.94257700  | 0.07451100  | 0.49688600  |
| C | 7.05402600  | 2.61852800  | -0.63134900 |
| H | 4.90238300  | 2.57608800  | -0.55648700 |
| C | 8.17932200  | 0.65908500  | 0.21514100  |
| H | 6.90508600  | -0.91255600 | 0.95188800  |
| C | 8.23797900  | 1.93172200  | -0.35222300 |
| H | 7.09143400  | 3.61386600  | -1.06456800 |
| H | 9.09470600  | 0.12091200  | 0.44369300  |
| H | 9.19861700  | 2.38897400  | -0.56991500 |
| C | -5.39578800 | 2.66766000  | 0.14721300  |
| C | -4.44278800 | 1.66937400  | 0.12630900  |
| C | -4.75157500 | 0.40885000  | -0.42925700 |
| C | -6.02445300 | 0.09253800  | -0.95600500 |
| C | -6.98466500 | 1.14053700  | -0.93331300 |
| C | -6.67076600 | 2.38453300  | -0.40349600 |
| H | -5.17733200 | 3.63985700  | 0.57813800  |
| C | -3.67779300 | -0.50739800 | -0.36025100 |
| C | -6.20016200 | -1.23894600 | -1.42444100 |
| H | -7.98100300 | 0.96092600  | -1.32916900 |
| H | -7.42958100 | 3.16162500  | -0.39947700 |
| C | -5.16039800 | -2.14580100 | -1.33044300 |
| C | -3.88884900 | -1.79646200 | -0.79220700 |
| H | -7.15506700 | -1.54334300 | -1.84419400 |
| H | -5.31395100 | -3.16302200 | -1.67954300 |

|   |             |             |             |
|---|-------------|-------------|-------------|
| H | -3.10567900 | -2.54548200 | -0.72242100 |
| C | -3.04425600 | 1.60364600  | 0.62281500  |
| C | -2.46191100 | 0.18373000  | 0.24739400  |
| O | -2.43254000 | 2.45681800  | 1.23872100  |
| N | -1.90123400 | -0.54874100 | 1.36816300  |
| C | -2.44123500 | -0.62596400 | 2.71562700  |
| C | -1.29736200 | -1.35178700 | 3.49126700  |
| C | -0.46135500 | -0.37450900 | 1.45196100  |
| H | -3.38355900 | -1.18485000 | 2.72529700  |
| C | -0.08995200 | -1.42064700 | 2.50496100  |
| H | -1.59998300 | -2.35246900 | 3.81022000  |
| H | -1.03953600 | -0.78977000 | 4.39339900  |
| H | -2.63227900 | 0.36734500  | 3.15428100  |
| H | -0.17473900 | 0.63496700  | 1.80034100  |
| H | -0.01957900 | -2.40556700 | 2.03765600  |
| H | 0.86174300  | -1.20895700 | 3.00100000  |

#### Catalyst

|   |             |             |             |
|---|-------------|-------------|-------------|
| C | 4.33154200  | -0.77791300 | -0.88761400 |
| C | 3.39731700  | 1.25764300  | 0.74992300  |
| C | 5.24133600  | -0.04171600 | -0.12734700 |
| C | 2.96586400  | -0.50386600 | -0.85037000 |
| C | 2.49158700  | 0.51568500  | -0.01527900 |
| C | 4.76273100  | 0.98313800  | 0.68515600  |
| H | 6.30067500  | -0.26064300 | -0.17090700 |
| H | 2.28063900  | -1.07325700 | -1.46121400 |
| H | 3.04016400  | 2.04325800  | 1.40871500  |
| C | 4.82957600  | -1.92290100 | -1.73482100 |
| C | 5.72136800  | 1.84437700  | 1.46620000  |
| F | 5.19057800  | 2.22969000  | 2.64846800  |
| F | 6.87860200  | 1.20353400  | 1.72393600  |
| F | 6.03135400  | 2.97432400  | 0.78982700  |
| F | 4.84985200  | -3.07866600 | -1.03716100 |
| F | 4.04662900  | -2.12238200 | -2.81582200 |
| F | 6.08779400  | -1.70290100 | -2.17493800 |
| N | 1.13113200  | 0.88805200  | 0.03997500  |
| C | 0.00216800  | 0.08879000  | -0.00150500 |
| N | -1.12781200 | 0.88552400  | -0.05521200 |
| H | -0.97817600 | 1.81972300  | -0.41548200 |
| S | 0.00421100  | -1.57455400 | 0.01088400  |
| H | 0.98104300  | 1.82651700  | 0.38880300  |
| C | -4.32827400 | -0.77301000 | 0.88729200  |
| C | -3.39477700 | 1.25343400  | -0.76244200 |
| C | -5.23753400 | -0.04265700 | 0.12229900  |
| C | -2.96191900 | -0.49933500 | 0.84757400  |
| C | -2.48818600 | 0.51421800  | 0.00596600  |
| C | -4.75918200 | 0.97888500  | -0.69606500 |
| H | -6.29683000 | -0.26268000 | 0.16676500  |
| H | -2.27660800 | -1.06502300 | 1.46171300  |
| H | -3.03864900 | 2.03675000  | -1.42408100 |
| C | -4.82473600 | -1.91206500 | 1.74346300  |
| C | -5.72845900 | 1.83192900  | -1.47316000 |
| F | -5.15873800 | 2.35260900  | -2.58278800 |
| F | -6.81335300 | 1.13021800  | -1.85842000 |
| F | -6.17097100 | 2.87304500  | -0.73176000 |
| F | -4.82545200 | -3.07686400 | 1.06085900  |
| F | -4.05163800 | -2.08960700 | 2.83544800  |
| F | -6.08970200 | -1.69907200 | 2.16707900  |

#### Complex A

|   |            |             |             |
|---|------------|-------------|-------------|
| C | 3.39213700 | 3.29951500  | -0.38692600 |
| C | 2.52095300 | 0.85292900  | -1.33693100 |
| C | 4.29164400 | 2.47877400  | -1.06917800 |
| C | 2.07392300 | 2.90909900  | -0.14914400 |
| C | 1.62619700 | 1.66878300  | -0.62791300 |
| C | 3.84109900 | 1.24636900  | -1.53679800 |
| H | 5.31563900 | 2.79097100  | -1.22718500 |
| H | 1.40181200 | 3.55220600  | 0.39945400  |
| H | 2.17532700 | -0.09267800 | -1.74277300 |
| C | 3.83898200 | 4.66365400  | 0.07896100  |
| C | 4.77248200 | 0.28325900  | -2.22096600 |
| F | 4.21506400 | -0.25099400 | -3.33015200 |
| F | 5.93683600 | 0.85305900  | -2.57608300 |

|   |             |             |             |
|---|-------------|-------------|-------------|
| F | 5.07293200  | -0.76684100 | -1.40468100 |
| F | 3.54331000  | 5.61603900  | -0.83146400 |
| F | 3.23947200  | 5.01807200  | 1.23506700  |
| F | 5.17453100  | 4.70860800  | 0.28201000  |
| N | 0.35593800  | 1.11861000  | -0.39545700 |
| C | -0.87524200 | 1.70237600  | -0.17491400 |
| N | -1.82284600 | 0.71308800  | -0.02169100 |
| H | -1.45444500 | -0.23543800 | -0.04878500 |
| S | -1.15103100 | 3.35092100  | -0.11507400 |
| H | 0.34324600  | 0.10701300  | -0.50631600 |
| C | -5.41720000 | 1.73862300  | 0.16960700  |
| C | -3.81881700 | -0.51096400 | 0.37008600  |
| C | -6.01821000 | 0.49991500  | 0.38645500  |
| C | -4.03495300 | 1.87433400  | 0.03568900  |
| C | -3.21782800 | 0.73802000  | 0.13306200  |
| C | -5.20034400 | -0.62524700 | 0.48320200  |
| H | -7.09338100 | 0.41213800  | 0.47633100  |
| H | -3.59254800 | 2.84217900  | -0.14646500 |
| H | -3.20016500 | -1.39759700 | 0.46765700  |
| C | -6.28060200 | 2.97579000  | 0.12706700  |
| C | -5.80957700 | -1.99311400 | 0.63553300  |
| F | -5.02921400 | -2.81491700 | 1.37088300  |
| F | -7.02342400 | -1.94787700 | 1.21608600  |
| F | -5.97416500 | -2.59627200 | -0.57325400 |
| F | -6.46986200 | 3.48628400  | 1.36450000  |
| F | -5.73132100 | 3.94890200  | -0.62659900 |
| F | -7.50511000 | 2.70727900  | -0.37952800 |
| C | -3.25029500 | -3.77085800 | -2.66720500 |
| H | -4.18321200 | -3.59747900 | -2.11707400 |
| H | -3.08677500 | -4.84673100 | -2.76169400 |
| H | -3.39999000 | -3.34706800 | -3.66813300 |
| C | -2.12137200 | -3.08589800 | -1.97332900 |
| H | -2.22119500 | -2.01176600 | -1.82779900 |
| C | -1.00969600 | -3.68949300 | -1.51971300 |
| H | -0.83078600 | -4.74610900 | -1.66881400 |
| C | 0.01441700  | -2.90975700 | -0.80857600 |
| O | -0.17058600 | -1.74402200 | -0.41647900 |
| N | 1.24789100  | -3.48962100 | -0.54282400 |
| C | 1.72639700  | -4.76386200 | -0.94566700 |
| O | 3.02703100  | -4.85021400 | -0.59617500 |
| C | 2.25495300  | -2.80639900 | 0.29166600  |
| H | 2.32276700  | -1.75631500 | 0.00818600  |
| C | 3.51533400  | -3.57136200 | -0.13132100 |
| H | 4.20613800  | -3.74959000 | 0.69257000  |
| H | 4.04294600  | -3.07731200 | -0.95165800 |
| O | 1.12098500  | -5.64800800 | -1.49285300 |
| C | 1.91184700  | -2.92142200 | 1.79462000  |
| H | 1.89944200  | -3.98204800 | 2.07049600  |
| H | 0.89687800  | -2.53622400 | 1.93238900  |
| C | 2.88211800  | -2.16007200 | 2.67201200  |
| C | 2.81153500  | -0.76183200 | 2.75779300  |
| C | 3.87678300  | -2.82638700 | 3.39927400  |
| C | 3.71466900  | -0.04896900 | 3.54480300  |
| H | 2.03640300  | -0.22854400 | 2.21260200  |
| C | 4.78199200  | -2.11527400 | 4.18965800  |
| H | 3.93424500  | -3.91163200 | 3.35958800  |
| C | 4.70421900  | -0.72468800 | 4.26242600  |
| H | 3.64249900  | 1.03299900  | 3.60224600  |
| H | 5.54299100  | -2.64935400 | 4.75090000  |
| H | 5.40564500  | -0.17005000 | 4.87826500  |

#### Complex B

|   |            |             |             |
|---|------------|-------------|-------------|
| C | 5.81768000 | 0.96966000  | -0.06270400 |
| C | 3.78056900 | -0.87021000 | 0.30488700  |
| C | 6.14539400 | -0.36302800 | 0.18431700  |
| C | 4.49184500 | 1.39826300  | -0.13698800 |
| C | 3.45676000 | 0.47181300  | 0.05161500  |
| C | 5.10962600 | -1.27875500 | 0.36354400  |
| H | 7.17955200 | -0.67580200 | 0.24752700  |
| H | 4.26274000 | 2.43756200  | -0.32015200 |
| H | 2.98587000 | -1.58982900 | 0.46904600  |
| C | 6.91599500 | 1.96993900  | -0.32536700 |
| C | 5.40454100 | -2.73802800 | 0.58082800  |
| F | 5.24997300 | -3.45329200 | -0.56330700 |

|   |             |             |             |
|---|-------------|-------------|-------------|
| F | 6.66157600  | -2.95040900 | 1.01419100  |
| F | 4.55923500  | -3.29111700 | 1.48514800  |
| F | 7.15288500  | 2.10280600  | -1.65134000 |
| F | 6.60287800  | 3.19417400  | 0.14400400  |
| F | 8.08144400  | 1.59651700  | 0.24759700  |
| N | 2.08446400  | 0.76151900  | -0.04681300 |
| C | 1.38421900  | 1.93261800  | 0.12118600  |
| N | 0.03932100  | 1.70625300  | -0.09719600 |
| H | -0.22626000 | 0.74325100  | -0.27267200 |
| S | 2.03985200  | 3.40690600  | 0.56246800  |
| H | 1.51955700  | -0.07907600 | -0.15920400 |
| C | -2.25008100 | 4.65971700  | -0.15156700 |
| C | -2.29073400 | 1.93732000  | 0.34373100  |
| C | -3.46620400 | 4.04434800  | 0.15192700  |
| C | -1.06099800 | 3.93560300  | -0.23156000 |
| C | -1.07572700 | 2.55560600  | 0.02189400  |
| C | -3.47229700 | 2.67291200  | 0.39213400  |
| H | -4.38289600 | 4.61830600  | 0.19141500  |
| H | -0.13575700 | 4.42932400  | -0.48858000 |
| H | -2.30905500 | 0.87376200  | 0.55153000  |
| C | -2.21363500 | 6.15281600  | -0.36555800 |
| C | -4.75061900 | 1.93300900  | 0.67071100  |
| F | -5.07023000 | 1.09443900  | -0.35425900 |
| F | -4.64422000 | 1.14560200  | 1.77135500  |
| F | -5.79938700 | 2.75260000  | 0.85529600  |
| F | -2.00304200 | 6.81288700  | 0.79423200  |
| F | -1.23056600 | 6.51503000  | -1.21495700 |
| F | -3.38099500 | 6.60948900  | -0.87304700 |
| C | 2.74663500  | -6.18699900 | 0.03001500  |
| H | 2.91872500  | -6.74842200 | 0.95699800  |
| H | 3.34254200  | -5.27299900 | 0.06086400  |
| H | 3.11925100  | -6.82225600 | -0.78361300 |
| C | 1.28919300  | -5.92026700 | -0.14896800 |
| H | 0.62206600  | -6.78062700 | -0.17924600 |
| C | 0.73794500  | -4.70217800 | -0.27551100 |
| H | 1.33556600  | -3.80106900 | -0.25032700 |
| C | -0.71997000 | -4.58514200 | -0.45095500 |
| O | -1.49293600 | -5.52978000 | -0.50900700 |
| N | -1.28177500 | -3.28185300 | -0.58833700 |
| C | -0.67345600 | -2.04528300 | -0.51904000 |
| O | -1.57603200 | -1.08716700 | -0.84242300 |
| C | -2.74037300 | -3.13268700 | -0.78233200 |
| H | -3.07475200 | -3.87167900 | -1.51115800 |
| C | -2.79346800 | -1.70689100 | -1.34625700 |
| H | -3.64039600 | -1.11919000 | -0.99370100 |
| H | -2.75241400 | -1.68053200 | -2.43883900 |
| O | 0.46941400  | -1.75514100 | -0.21279400 |
| C | -3.52114500 | -3.31870500 | 0.53760000  |
| H | -3.23089500 | -2.52719100 | 1.23852700  |
| H | -3.20908000 | -4.27365100 | 0.96844300  |
| C | -5.01882300 | -3.30824200 | 0.31646200  |
| C | -5.65139000 | -4.43272900 | -0.23489800 |
| C | -5.79414300 | -2.18368100 | 0.62632400  |
| C | -7.02456200 | -4.43068700 | -0.47432400 |
| H | -5.06206300 | -5.31686500 | -0.46691700 |
| C | -7.17008100 | -2.18060400 | 0.38639200  |
| H | -5.32705800 | -1.30679200 | 1.06535600  |
| C | -7.78805300 | -3.30237100 | -0.16536500 |
| H | -7.50003400 | -5.31121800 | -0.89647500 |
| H | -7.75604100 | -1.30053100 | 0.63408300  |
| H | -8.85823600 | -3.30103500 | -0.34943300 |

TS-Mode A

|   |             |             |             |
|---|-------------|-------------|-------------|
| C | -2.06482300 | -3.65265800 | -2.06450200 |
| H | -2.85642400 | -3.78717800 | -1.31897700 |
| H | -1.54909200 | -4.60969400 | -2.18135300 |
| H | -2.55010100 | -3.40226700 | -3.01291300 |
| C | -1.10458100 | -2.57368100 | -1.61297900 |
| H | -1.49054200 | -1.55623400 | -1.62858800 |
| C | -0.14435000 | -2.85995300 | -0.64593900 |
| H | 0.10857500  | -3.88468300 | -0.41619000 |
| C | 0.44168000  | -1.82279100 | 0.16111700  |
| O | 0.18564100  | -0.59612100 | 0.02431200  |
| N | 1.33385500  | -2.16466300 | 1.18898800  |

|   |             |             |             |
|---|-------------|-------------|-------------|
| C | 1.73099300  | -3.45571700 | 1.59412000  |
| O | 2.68551400  | -3.32874300 | 2.54719100  |
| C | 1.95672600  | -1.14027200 | 2.04549900  |
| H | 2.33279000  | -0.32864500 | 1.42217200  |
| C | 3.11521600  | -1.95566000 | 2.63947300  |
| H | 3.30586000  | -1.72663300 | 3.68809900  |
| H | 4.03661600  | -1.84105900 | 2.06127400  |
| O | 1.32045900  | -4.52287300 | 1.21398600  |
| C | 0.98195700  | -0.58340400 | 3.10744100  |
| H | 0.57362000  | -1.42258800 | 3.68178700  |
| H | 0.14637500  | -0.11510900 | 2.57855000  |
| C | 1.64369700  | 0.40730000  | 4.04418600  |
| C | 2.16806600  | 1.61602800  | 3.56195200  |
| C | 1.76656400  | 0.12825400  | 5.41172200  |
| C | 2.79746600  | 2.51634100  | 4.42033200  |
| H | 2.08723800  | 1.86291300  | 2.50751300  |
| C | 2.39037100  | 1.03073100  | 6.27555000  |
| H | 1.36249000  | -0.80134000 | 5.80495200  |
| C | 2.90974400  | 2.22717300  | 5.78172600  |
| H | 3.19880300  | 3.44402200  | 4.02313000  |
| H | 2.46932900  | 0.79682600  | 7.33322000  |
| H | 3.39659900  | 2.92981900  | 6.45134200  |
| C | 4.10880200  | -5.34323800 | -1.42541100 |
| C | 3.46713200  | -4.16215000 | -1.72840800 |
| C | 4.04868800  | -2.93134400 | -1.37042900 |
| C | 5.28009600  | -2.83055400 | -0.69759100 |
| C | 5.93012900  | -4.06020400 | -0.39826300 |
| C | 5.35611500  | -5.27125200 | -0.75382200 |
| H | 3.67116800  | -6.30084200 | -1.68821000 |
| C | 3.24844000  | -1.81414400 | -1.76352300 |
| C | 5.73591900  | -1.51359800 | -0.39899900 |
| H | 6.88705700  | -4.04693400 | 0.11650500  |
| H | 5.87338800  | -6.19339300 | -0.50722600 |
| C | 4.96689100  | -0.42378300 | -0.76356000 |
| C | 3.72094200  | -0.55033900 | -1.44069800 |
| H | 6.68536400  | -1.36857300 | 0.10863700  |
| H | 5.31296800  | 0.57764600  | -0.53134400 |
| H | 3.18291900  | 0.35639900  | -1.68679900 |
| C | 2.18073900  | -3.86632500 | -2.41979500 |
| C | 2.05318800  | -2.37411500 | -2.39339100 |
| O | 1.42165200  | -4.67545000 | -2.94829200 |
| N | 1.10780800  | -1.72638900 | -3.10817600 |
| C | 1.10846900  | -0.25654900 | -3.33134900 |
| C | 0.08076100  | -0.07247500 | -4.45519300 |
| C | -0.07845200 | -2.27743200 | -3.48586600 |
| H | 2.11385900  | 0.06510000  | -3.60478300 |
| C | -0.86171900 | -1.29466600 | -4.32686300 |
| H | 0.58686400  | -0.08949200 | -5.42447800 |
| H | -0.44323500 | 0.88171000  | -4.36974600 |
| H | 0.81275400  | 0.23264000  | -2.39989600 |
| H | -0.06965200 | -3.34392000 | -3.66178500 |
| H | -1.12108200 | -1.71441500 | -5.30377000 |
| H | -1.80804100 | -1.02636700 | -3.84172300 |
| C | 0.60541100  | 5.47712000  | -0.92112700 |
| C | 1.38389300  | 2.90069500  | -0.28606500 |
| C | 1.96334300  | 5.20365500  | -0.75900400 |
| C | -0.37002300 | 4.49112200  | -0.77151000 |
| C | 0.01542800  | 3.18164400  | -0.44099600 |
| C | 2.33962300  | 3.90019400  | -0.44090400 |
| H | 2.70524200  | 5.98187800  | -0.88021400 |
| H | -1.41524900 | 4.72722800  | -0.90400800 |
| H | 1.69304500  | 1.88944200  | -0.03957500 |
| C | 0.16905600  | 6.89301600  | -1.20944800 |
| C | 3.78890100  | 3.53099300  | -0.29028300 |
| F | 4.22136900  | 2.77581500  | -1.33803700 |
| F | 4.59400500  | 4.60468700  | -0.21786000 |
| F | 4.00204700  | 2.78158500  | 0.82100400  |
| F | -0.95176900 | 6.93145900  | -1.95798100 |
| F | -0.08863900 | 7.56956900  | -0.06863500 |
| F | 1.12629800  | 7.58260300  | -1.87023300 |
| N | -0.83970800 | 2.08417600  | -0.27720100 |
| C | -2.20749000 | 1.97725600  | -0.12985000 |
| N | -2.53898000 | 0.65142500  | 0.05413600  |
| H | -1.74066900 | 0.01791400  | 0.11634200  |
| S | -3.28897100 | 3.25432300  | -0.14880300 |

|   |             |             |             |
|---|-------------|-------------|-------------|
| H | -0.33071200 | 1.20992900  | -0.15397000 |
| C | -6.17593600 | -0.21968600 | 0.14734200  |
| C | -3.70749200 | -1.27672600 | 0.82501700  |
| C | -6.11529000 | -1.49978100 | 0.69530100  |
| C | -5.02621700 | 0.53774500  | -0.07754500 |
| C | -3.77287900 | 0.01167100  | 0.26909400  |
| C | -4.86563700 | -2.02193900 | 1.02588600  |
| H | -7.01662100 | -2.07705900 | 0.85779700  |
| H | -5.09881800 | 1.52289100  | -0.51214800 |
| H | -2.74728900 | -1.69945600 | 1.10202300  |
| C | -7.52295700 | 0.38392800  | -0.16424600 |
| C | -4.74940100 | -3.42988200 | 1.54656200  |
| F | -3.71869200 | -3.56422600 | 2.40821900  |
| F | -5.87047100 | -3.82895900 | 2.17950200  |
| F | -4.53273500 | -4.31221000 | 0.53691300  |
| F | -8.03862300 | 1.02009200  | 0.91077100  |
| F | -7.45276800 | 1.28573600  | -1.16512100 |
| F | -8.41802200 | -0.56162500 | -0.52911600 |

TS-Mode B

|   |             |             |             |
|---|-------------|-------------|-------------|
| C | -0.74326500 | -3.15518800 | -3.84012800 |
| H | -0.71387500 | -2.29634700 | -4.52143600 |
| H | -1.62647600 | -3.05648400 | -3.20338800 |
| H | -0.86669600 | -4.05055100 | -4.45774000 |
| C | 0.52544900  | -3.20531300 | -3.01562400 |
| H | 1.44167800  | -3.42895900 | -3.55863400 |
| C | 0.67879000  | -2.35155800 | -1.92386300 |
| H | -0.16200100 | -1.80775300 | -1.52062600 |
| C | 1.99507000  | -2.12061500 | -1.38821300 |
| O | 3.01301900  | -2.74036000 | -1.72135000 |
| N | 2.16921500  | -1.11500000 | -0.38058200 |
| C | 1.26088700  | -0.21685600 | 0.12244300  |
| O | 1.82260500  | 0.47377100  | 1.14239000  |
| C | 3.50393400  | -0.89355700 | 0.20928700  |
| H | 3.93996300  | -1.85988200 | 0.46160600  |
| C | 3.11769600  | -0.10006000 | 1.46556300  |
| H | 3.79804800  | 0.72145600  | 1.68852700  |
| H | 2.99184000  | -0.73680400 | 2.34539900  |
| O | 0.11847200  | 0.01869200  | -0.24734500 |
| C | 4.45053000  | -0.12999900 | -0.74476700 |
| H | 4.08100500  | 0.89279800  | -0.88090800 |
| H | 4.41247900  | -0.63400400 | -1.71374300 |
| C | 5.87246600  | -0.11252700 | -0.22388700 |
| C | 6.65099100  | -1.27880900 | -0.28132300 |
| C | 6.43206400  | 1.04038900  | 0.34106700  |
| C | 7.95208500  | -1.29371400 | 0.21834500  |
| H | 6.23189000  | -2.17480700 | -0.73346200 |
| C | 7.73612500  | 1.02702800  | 0.84182300  |
| H | 5.85118000  | 1.95719000  | 0.37200200  |
| C | 8.49841200  | -0.13926000 | 0.78455700  |
| H | 8.54314300  | -2.20334700 | 0.15992700  |
| H | 8.15604500  | 1.93190400  | 1.27154700  |
| H | 9.51326000  | -0.14845400 | 1.17112700  |
| C | -1.81986800 | -2.92452200 | 2.29617000  |
| C | -0.78795900 | -3.47077600 | 1.56318900  |
| C | 0.49713600  | -3.58498000 | 2.12396800  |
| C | 0.80528500  | -3.15313500 | 3.42655600  |
| C | -0.26694600 | -2.57759400 | 4.16419400  |
| C | -1.53386600 | -2.47272800 | 3.61048300  |
| H | -2.82095800 | -2.85422100 | 1.88355800  |
| C | 1.42709300  | -4.20417600 | 1.23068000  |
| C | 2.14564300  | -3.35816600 | 3.86506300  |
| H | -0.08952300 | -2.22475100 | 5.17657900  |
| H | -2.33363100 | -2.03608300 | 4.20094600  |
| C | 3.05360800  | -3.96430100 | 3.01696800  |
| C | 2.71795300  | -4.39525300 | 1.70181800  |
| H | 2.44478200  | -3.05492000 | 4.86432600  |
| H | 4.06987300  | -4.13064000 | 3.36254100  |
| H | 3.48763300  | -4.87465500 | 1.11047600  |
| C | -0.73092900 | -4.04714300 | 0.18961600  |
| C | 0.69268000  | -4.45611200 | -0.01157800 |
| O | -1.67713400 | -4.18620100 | -0.58453500 |
| N | 1.09868700  | -5.14605800 | -1.10029600 |
| C | 2.44388300  | -5.77376500 | -1.23154000 |



|   |             |             |             |
|---|-------------|-------------|-------------|
| C | 2.56322800  | -6.08314700 | -2.73057900 |
| C | 0.40629400  | -5.17780000 | -2.27549200 |
| H | 2.45687400  | -6.67171400 | -0.60368700 |
| C | 1.10550400  | -6.11008400 | -3.23151700 |
| H | 3.09590300  | -7.01878900 | -2.91306100 |
| H | 3.11383600  | -5.27384700 | -3.21568200 |
| H | 3.20729200  | -5.07579500 | -0.89894300 |
| H | -0.67043700 | -5.11691300 | -2.18915100 |
| H | 0.67283300  | -7.11826700 | -3.16753000 |
| H | 1.00838400  | -5.78793000 | -4.27245700 |
| C | -6.23431200 | 0.54278100  | 0.50166400  |
| C | -3.88411500 | -0.62121200 | -0.39388500 |
| C | -6.25679200 | -0.78122300 | 0.06612200  |
| C | -5.05906200 | 1.29348100  | 0.50280400  |
| C | -3.86822900 | 0.71463700  | 0.03922300  |
| C | -5.06647300 | -1.35691500 | -0.37507400 |
| H | -7.17659400 | -1.35162400 | 0.07454000  |
| H | -5.06352300 | 2.31413100  | 0.85359600  |
| H | -2.97161200 | -1.08821200 | -0.75138300 |
| C | -7.52117500 | 1.19702200  | 0.93769200  |
| C | -5.03643700 | -2.80605400 | -0.78494400 |
| F | -4.63784600 | -3.59899700 | 0.24054500  |
| F | -6.25488200 | -3.24660300 | -1.16656400 |
| F | -4.18667300 | -3.02218600 | -1.81065200 |
| F | -8.15458500 | 1.78599500  | -0.10098500 |
| F | -8.38275600 | 0.29672100  | 1.46423900  |
| F | -7.31233700 | 2.15151100  | 1.86831500  |
| N | -2.61912100 | 1.35871400  | 0.02565800  |
| C | -2.28176500 | 2.69588600  | -0.03965200 |
| N | -0.91174900 | 2.82309000  | -0.03440000 |
| H | -0.40427800 | 1.94497800  | 0.06130300  |
| S | -3.37237100 | 3.96475200  | -0.11307900 |
| H | -1.83846600 | 0.71219500  | -0.04940200 |
| C | 0.54859700  | 6.21282500  | -0.65559400 |
| C | 1.27987600  | 3.69420700  | 0.22648800  |
| C | 1.88052100  | 5.97709400  | -0.31526600 |
| C | -0.42146400 | 5.21321700  | -0.57493000 |
| C | -0.05795600 | 3.93330600  | -0.12733500 |
| C | 2.23291100  | 4.70223200  | 0.12388800  |
| H | 2.61801600  | 6.76675000  | -0.37926600 |
| H | -1.44738800 | 5.42164800  | -0.83919800 |
| H | 1.56970100  | 2.71907300  | 0.60252400  |
| C | 0.16200200  | 7.56683000  | -1.19681700 |
| C | 3.66295700  | 4.36876200  | 0.44477500  |
| F | 4.25227500  | 3.67933500  | -0.57174800 |
| F | 4.41402000  | 5.46295000  | 0.66497000  |
| F | 3.76832100  | 3.57247900  | 1.53937100  |
| F | 0.34912700  | 7.63177900  | -2.53578100 |
| F | -1.13228400 | 7.85774400  | -0.96238100 |
| F | 0.90967200  | 8.55218800  | -0.64956500 |
